# Supplementary material for: Celastrol alleviates comorbid obesity and depression by directly binding amygdala HnRNPA1 in a mouse model
Source: PubMed Central journal article supplement (PMC8181197; doi:10.1002/ctm2.394), 2021-06-06
Supplement: CTM2-11-e394-s002.pdf [file CTM2-11-e394-s002.pdf]

Fig S1

| ALT   |       |       |       |       | AST    |        |        |        |        | Cr    |       |       |       |       |
|-------|-------|-------|-------|-------|--------|--------|--------|--------|--------|-------|-------|-------|-------|-------|
| chow  | HFD   | 0.5mg | 1mg   | 2mg   | chow   | HFD    | 0.5mg  | 1mg    | 2mg    | chow  | HFD   | 0.5mg | 1mg   | 2mg   |
| 28.22 | 36.14 | 29.71 | 31.14 | 29.43 | 113.51 | 154.19 | 94.08  | 133.85 | 126.66 | 16.92 | 18.31 | 15.54 | 15.54 | 15.54 |
| 27.79 | 30.16 | 19.15 | 36.02 | 30.31 | 104.59 | 170.04 | 104.59 | 114.4  | 127.09 | 19.69 | 15.54 | 12.77 | 18.31 | 16.92 |
| 19.86 | 27.67 | 23.42 | 33.5  | 41.63 | 170.4  | 165.74 | 147.54 | 110.01 | 106.32 | 15.54 | 16.92 | 14.15 | 12.77 | 19.69 |
| 30.41 | 27.91 | 38.45 | 44.67 | 25.66 | 134.8  | 179.71 | 85.2   | 129.64 | 146.74 | 18.31 | 15.54 | 18.31 | 15.54 | 19.69 |
| 32.26 | 23.43 | 41.79 | 34.45 | 35.68 | 161.71 | 133.18 | 178.17 | 100.18 | 107.93 | 12.77 | 15.54 | 14.15 | 11.38 | 18.31 |
| 20.11 | 42.37 | 37.79 | 42.31 | 15.78 | 159.3  | 131.39 | 124.6  | 106.98 | 134.2  | 14.15 | 12.77 | 14.15 | 19.69 | 22.46 |
| 33.98 | 43.09 | 31.98 | 33.4  | 23.54 | 123.25 | 119.38 | 158.65 | 138.19 | 170.98 | 11.38 | 16.92 | 19.69 | 23.85 | 12.77 |
| 33.75 | 46.8  | 29.27 | 38.9  | 24.72 | 106.15 | 122.89 | 103.88 | 172.78 | 165.46 | 15.54 | 19.69 | 16.92 | 18.31 | 15.54 |

Fig S2

| No. HnRNPA1 |     |     |
|-------------|-----|-----|
| Chow        | Com | Cel |
| 6           | 17  | 15  |
| 10          | 31  | 10  |
| 8           | 18  | 11  |
| 9           | 22  | 9   |
| 5           | 34  | 11  |
