# Supplementary material for: Celastrol alleviates comorbid obesity and depression by directly binding amygdala HnRNPA1 in a mouse model
Source: PubMed Central journal article supplement (PMC8181197; doi:10.1002/ctm2.394), 2021-06-06
Supplement: CTM2-11-e394-s004.pdf [file CTM2-11-e394-s004.pdf]

|                |        |        |        |        |        |        |        |        |        |        |        |        |        |        |        |
|----------------|--------|--------|--------|--------|--------|--------|--------|--------|--------|--------|--------|--------|--------|--------|--------|
| CXCL1          | 36.61  | 43.76  | 34.15  | 32.9   | 41.41  | 31.64  | 44.92  | 46.07  | 41.41  | 47.21  | 40.23  | 44.92  | 39.63  | 35.39  | 37.83  |
| CCL4           | 42.32  | 32.81  | 32.81  | 29.1   | 69.88  | 51.66  | 32.81  | 32.81  | 32.81  | 51.66  | 51.66  | 32.81  | 32.81  | 51.66  | 32.81  |
| TIMP-1         | 123.14 | 143.65 | 117.89 | 128.34 | 101.86 | 143.65 | 123.14 | 128.34 | 128.34 | 158.56 | 123.14 | 128.34 | 130.92 | 123.14 | 128.34 |
| C1qR1          | 683.91 | 613.09 | 521.68 | 446.58 | 461.67 | 451.61 | 546.51 | 481.74 | 436.49 | 837.98 | 666.88 | 652.25 | 539.07 | 654.69 | 561.37 |
| FGF-basic      | 2366   | 3217   | 3024   | 2322   | 1688   | 2536   | 2138   | 1819   | 2173   | 2572   | 2893   | 2314   | 2293   | 3084   | 2697   |
| Angiopoietin-2 | 539.4  | 787.15 | 593.16 | 483    | 423.58 | 693.92 | 453.69 | 423.58 | 483    | 566.59 | 593.16 | 553.08 | 566.59 | 483    | 511.55 |

n=5 mice/ group

**Fig.1F**

| No.TNF $\alpha$ -TMEM119 |       |         | TNF $\alpha$ /GAPDH mRNA expression in BLA |         |         |
|--------------------------|-------|---------|--------------------------------------------|---------|---------|
| Chow                     | Com   | Cel-2.0 | Chow                                       | Com     | Cel-2.0 |
| 4.67                     | 15.33 | 6.33    | 0.00001                                    | 0.00082 | 0.00012 |
| 6.33                     | 20.00 | 4.33    | 0.00007                                    | 0.00132 | 0.00008 |
| 8.33                     | 25.67 | 6.00    | 0.00002                                    | 0.00083 | 0.00004 |
| 7.67                     | 25.00 | 10.00   | 0.00005                                    | 0.00095 | 0.00001 |
| 8.00                     | 22.00 | 8.40    |                                            |         |         |

n=5 mice/ group

n=4 mice/ group

**Fig.1G**

| Tail suspension test-Immunobility |                   |         |                  | Forced swimming test- |                   |         |                  |
|-----------------------------------|-------------------|---------|------------------|-----------------------|-------------------|---------|------------------|
| Chow-PBS                          | Chow-TNF $\alpha$ | DIO-PBS | DIO-TNF $\alpha$ | Chow-PBS              | Chow-TNF $\alpha$ | DIO-PBS | DIO-TNF $\alpha$ |
| 131                               | 87                | 101     | 147              | 180                   | 177               | 144     | 230              |
| 86                                | 46                | 128     | 128              | 149                   | 165               | 189     | 235              |
| 13                                | 134               | 99      | 117              | 210                   | 203               | 171     | 220              |
| 124                               | 123               | 127     | 182              | 202                   | 213               | 201     | 216              |
| 88                                | 55                | 35      | 171              | 206                   | 159               | 197     | 210              |
| 105                               | 114               | 140     | 139              | 199                   | 204               | 211     | 199              |
| 90                                | 70                | 47      | 155              | 187                   | 162               | 205     | 186              |
| 67                                | 117               | 120     | 116              | 163                   | 180               | 182     | 227              |

n=8 mice/ group

n=8 mice/ group

| Celastrol<br>( $\mu\text{M}$ ) | Fig2.C                      |                             |                              |
|--------------------------------|-----------------------------|-----------------------------|------------------------------|
|                                | HnRNPA1<br>(52°C<br>pixels) | HnRNPA1<br>(37°C<br>pixels) | HnRNPA1<br>(52°C/ 37°C<br>C) |
| 0                              | 8157.468                    | 26100.589                   | 0.3125396                    |
| 5                              | 12127.64                    | 28028.104                   | 0.4326957                    |
| 10                             | 12545.64                    | 28098.225                   | 0.4464923                    |
| 50                             | 17066.589                   | 27451.811                   | 0.6216926                    |
| 100                            | 20526.054                   | 28977.518                   | 0.7083441                    |
| 200                            | 24033.125                   | 29343.711                   | 0.8190213                    |

| Fig. 2E      |                    |                     |                    |                    |                  |       |           |       |           |       |      |       |      |       |   |       |   |       |   |       |   |       |   |
|--------------|--------------------|---------------------|--------------------|--------------------|------------------|-------|-----------|-------|-----------|-------|------|-------|------|-------|---|-------|---|-------|---|-------|---|-------|---|
|              | 1.56 $\mu\text{M}$ | 3.125 $\mu\text{M}$ | 6.25 $\mu\text{M}$ | 12.5 $\mu\text{M}$ | 25 $\mu\text{M}$ | data  | data      | data  | data      | data  | data | data  | data |       |   |       |   |       |   |       |   |       |   |
| -37.80000305 | -1.127498092       | -37.70000076        | -1.1127            | -37.6              | -0.9713          | -37.5 | -0.9566   | -37.5 | -0.8837   | -37.8 | 0    | -37.7 | 0    | -37.6 | 0 | -37.5 | 0 | -37.5 | 0 | -37.4 | 0 | -37.4 | 0 |
| -37.70000076 | -1.109100053       | -37.59999847        | -1.0463            | -37.5              | -0.9792          | -37.4 | -0.959999 | -37.4 | -0.775699 | -37.7 | 0    | -37.6 | 0    | -37.5 | 0 | -37.4 | 0 | -37.4 | 0 | -37.3 | 0 | -37.4 | 0 |
| -37.60000229 | -1.066599979       | -37.5               | -0.9557            | -37.4              | -0.942           | -37.3 | -0.8697   | -37.3 | -0.6625   | -37.6 | 0    | -37.5 | 0    | -37.4 | 0 | -37.3 | 0 | -37.3 | 0 | -37.2 | 0 | -37.3 | 0 |
| -37.5        | -1.009400042       | -37.39999771        | -0.929099          | -37.3              | -0.9044          | -37.2 | -0.663    | -37.2 | -0.5791   | -37.5 | 0    | -37.4 | 0    | -37.3 | 0 | -37.2 | 0 | -37.2 | 0 | -37.1 | 0 | -37.2 | 0 |
| -37.40000153 | -0.894299956       | -37.29999924        | -0.7549            | -37.2              | -0.8521          | -37.1 | -0.5963   | -37.1 | -0.4678   | -37.4 | 0    | -37.3 | 0    | -37.2 | 0 | -37.1 | 0 | -37.1 | 0 | -37.0 | 0 | -37.1 | 0 |
| -37.30000305 | -0.923200707       | -37.20000076        | -0.7776            | -37.1              | -0.8312          | -37   | -0.6385   | -37   | -0.5283   | -37.3 | 0    | -37.2 | 0    | -37.1 | 0 | -37   | 0 | -37   | 0 | -36.9 | 0 | -37   | 0 |
| -37.20000076 | -0.921000107       | -37.09999847        | -0.8336            | -37                | -0.8146          | -36.9 | -0.7352   | -36.9 | -0.6295   | -37.2 | 0    | -37.1 | 0    | -37   | 0 | -36.9 | 0 | -36.9 | 0 | -36.8 | 0 | -36.9 | 0 |
| -37.10000229 | -0.988000043       | -37                 | -0.9166            | -36.9              | -0.913           | -36.8 | -0.8393   | -36.8 | -0.7096   | -37.1 | 0    | -37   | 0    | -36.9 | 0 | -36.8 | 0 | -36.8 | 0 | -36.7 | 0 | -36.8 | 0 |
| -37          | -1.112100006       | -36.89999771        | -0.9198            | -36.8              | -1.027           | -36.7 | -0.9313   | -36.7 | -0.778    | -37   | 0    | -36.9 | 0    | -36.8 | 0 | -36.7 | 0 | -36.7 | 0 | -36.6 | 0 | -36.7 | 0 |
| -36.90000153 | -1.162500054       | -36.79999924        | -1.0125            | -36.7              | -1.0869          | -36.6 | -1.0163   | -36.6 | -0.889    | -36.9 | 0    | -36.8 | 0    | -36.7 | 0 | -36.6 | 0 | -36.6 | 0 | -36.5 | 0 | -36.6 | 0 |
| -36.80000305 | -1.246600332       | -36.70000076        | -1.0961            | -36.6              | -1.1279          | -36.5 | -1.0934   | -36.5 | -0.9321   | -36.8 | 0    | -36.7 | 0    | -36.6 | 0 | -36.5 | 0 | -36.5 | 0 | -36.4 | 0 | -36.5 | 0 |
| -36.70000076 | -1.288799944       | -36.59999847        | -1.1196            | -36.5              | -1.1524          | -36.4 | -1.0878   | -36.4 | -0.9943   | -36.7 | 0    | -36.6 | 0    | -36.5 | 0 | -36.4 | 0 | -36.4 | 0 | -36.3 | 0 | -36.4 | 0 |
| -36.60000229 | -1.33059997        | -36.5               | -1.1786            | -36.4              | -1.1873          | -36.3 | -1.1127   | -36.3 | -0.9919   | -36.6 | 0    | -36.5 | 0    | -36.4 | 0 | -36.3 | 0 | -36.3 | 0 | -36.2 | 0 | -36.3 | 0 |
| -36.5        | -1.343200044       | -36.39999771        | -1.2137            | -36.3              | -1.2043          | -36.2 | -1.1153   | -36.2 | -1.0118   | -36.5 | 0    | -36.4 | 0    | -36.3 | 0 | -36.2 | 0 | -36.2 | 0 | -36.1 | 0 | -36.2 | 0 |
| -36.40000153 | -1.383800058       | -36.29999924        | -1.2368            | -36.2              | -1.2153          | -36.1 | -1.1718   | -36.1 | -1.0396   | -36.4 | 0    | -36.3 | 0    | -36.2 | 0 | -36.1 | 0 | -36.1 | 0 | -36   | 0 | -36.1 | 0 |
| -36.30000305 | -1.357000346       | -36.20000076        | -1.2551            | -36.1              | -1.2621          | -36   | -1.197    | -36   | -1.0443   | -36.3 | 0    | -36.2 | 0    | -36.1 | 0 | -36   | 0 | -36   | 0 | -35.9 | 0 | -36   | 0 |
| -36.20000076 | -1.36029997        | -36.09999847        | -1.2607            | -36                | -1.2608          | -35.9 | -1.2036   | -35.9 | -1.0548   | -36.2 | 0    | -36.1 | 0    | -36   | 0 | -35.9 | 0 | -35.9 | 0 | -35.8 | 0 | -35.9 | 0 |
| -36.10000229 | -1.390399991       | -36                 | -1.2742            | -35.9              | -1.2762          | -35.8 | -1.2219   | -35.8 | -1.0953   | -36.1 | 0    | -36   | 0    | -35.9 | 0 | -35.8 | 0 | -35.8 | 0 | -35.7 | 0 | -35.8 | 0 |
| -36          | -1.406199975       | -35.89999771        | -1.3153            | -35.8              | -1.3099          | -35.7 | -1.2105   | -35.7 | -1.0873   | -36   | 0    | -35.9 | 0    | -35.8 | 0 | -35.7 | 0 | -35.7 | 0 | -35.6 | 0 | -35.7 | 0 |
| -35.90000153 | -1.382899981       | -35.79999924        | -1.339             | -35.7              | -1.3075          | -35.6 | -1.1949   | -35.6 | -1.0953   | -35.9 | 0    | -35.8 | 0    | -35.7 | 0 | -35.6 | 0 | -35.6 | 0 | -35.5 | 0 | -35.6 | 0 |
| -35.80000305 | -1.421899647       | -35.70000076        | -1.3196            | -35.6              | -1.2746          | -35.5 | -1.1805   | -35.5 | -1.0887   | -35.8 | 0    | -35.7 | 0    | -35.6 | 0 | -35.5 | 0 | -35.5 | 0 | -35.4 | 0 | -35.5 | 0 |
| -35.70000076 | -1.419700003       | -35.59999847        | -1.3488            | -35.5              | -1.2595          | -35.4 | -1.1628   | -35.4 | -1.0692   | -35.7 | 0    | -35.6 | 0    | -35.5 | 0 | -35.4 | 0 | -35.4 | 0 | -35.3 | 0 | -35.4 | 0 |
| -35.60000229 | -1.411699944       | -35.5               | -1.3414            | -35.4              | -1.2601          | -35.3 | -1.1566   | -35.3 | -1.0646   | -35.6 | 0    | -35.5 | 0    | -35.4 | 0 | -35.3 | 0 | -35.3 | 0 | -35.2 | 0 | -35.3 | 0 |
| -35.5        | -1.423099962       | -35.39999771        | -1.3267            | -35.3              | -1.2614          | -35.2 | -1.1118   | -35.2 | -1.0666   | -35.5 | 0    | -35.4 | 0    | -35.3 | 0 | -35.2 | 0 | -35.2 | 0 | -35.1 | 0 | -35.2 | 0 |
| -35.40000153 | -1.383600002       | -35.29999924        | -1.3069            | -35.2              | -1.2225          | -35.1 | -1.121599 | -35.1 | -1.036599 | -35.4 | 0    | -35.3 | 0    | -35.2 | 0 | -35.1 | 0 | -35.1 | 0 | -35   | 0 | -35.1 | 0 |
| -35.30000305 | -1.369700159       | -35.20000076        | -1.3114            | -35.1              | -1.2344          | -35   | -1.1045   | -35   | -1.0297   | -35.3 | 0    | -35.2 | 0    | -35.1 | 0 | -35   | 0 | -35   | 0 | -34.9 | 0 | -35   | 0 |
| -35.20000076 | -1.3509            | -35.09999847        | -1.308399          | -35                | -1.2259          | -34.9 | -1.0633   | -34.9 | -1.0007   | -35.2 | 0    | -35.1 | 0    | -35   | 0 | -34.9 | 0 | -34.9 | 0 | -34.8 | 0 | -34.9 | 0 |
| -35.10000229 | -1.365499994       | -35                 | -1.2889            | -34.9              | -1.1964          | -34.8 | -1.0553   | -34.8 | -0.9926   | -35.1 | 0    | -35   | 0    | -34.9 | 0 | -34.8 | 0 | -34.8 | 0 | -34.7 | 0 | -34.8 | 0 |
| -35          | -1.324300002       | -34.89999771        | -1.2574            | -34.8              | -1.1676          | -34.7 | -1.0647   | -34.7 | -0.9865   | -35   | 0    | -34.9 | 0    | -34.8 | 0 | -34.7 | 0 | -34.7 | 0 | -34.6 | 0 | -34.7 | 0 |
| -34.90000153 | -1.300599998       | -34.79999924        | -1.2511            | -34.7              | -1.1762          | -34.6 | -1.0379   | -34.6 | -0.9776   | -34.9 | 0    | -34.8 | 0    | -34.7 | 0 | -34.6 | 0 | -34.6 | 0 | -34.5 | 0 | -34.6 | 0 |
| -34.80000305 | -1.292000116       | -34.70000076        | -1.2461            | -34.6              | -1.1628          | -34.5 | -1.0371   | -34.5 | -0.9735   | -34.8 | 0    | -34.7 | 0    | -34.6 | 0 | -34.5 | 0 | -34.5 | 0 | -34.4 | 0 | -34.5 | 0 |
| -34.70000076 | -1.268500013       | -34.59999847        | -1.2323            | -34.5              | -1.1429          | -34.4 | -1.0289   | -34.4 | -0.945    | -34.7 | 0    | -34.6 | 0    | -34.5 | 0 | -34.4 | 0 | -34.4 | 0 | -34.3 | 0 | -34.4 | 0 |
| -34.60000229 | -1.255699993       | -34.5               | -1.2495            | -34.4              | -1.1308          | -34.3 | -1.011    | -34.3 | -0.9531   | -34.6 | 0    | -34.5 | 0    | -34.4 | 0 | -34.3 | 0 | -34.3 | 0 | -34.2 | 0 | -34.3 | 0 |
| -34.5        | -1.255100019       | -34.39999771        | -1.2191            | -34.3              | -1.119           | -34.2 | -1.0093   | -34.2 | -0.9207   | -34.5 | 0    | -34.4 | 0    | -34.3 | 0 | -34.2 | 0 | -34.2 | 0 | -34.1 | 0 | -34.2 | 0 |
| -34.40000153 | -1.239699973       | -34.29999924        | -1.2029            | -34.2              | -1.1004          | -34.1 | -0.9992   | -34.1 | -0.9159   | -34.4 | 0    | -34.3 | 0    | -34.2 | 0 | -34.1 | 0 | -34.1 | 0 | -34   | 0 | -34.1 | 0 |
| -34.30000305 | -1.218100105       | -34.20000076        | -1.167             | -34.1              | -1.0878          | -34   | -0.9991   | -34   | -0.9208   | -34.3 | 0    | -34.2 | 0    | -34.1 | 0 | -34   | 0 | -34   | 0 | -33.9 | 0 | -34   | 0 |
| -34.20000076 | -1.199999984       | -34.09999847        | -1.1683            | -34                | -1.0819          | -33.9 | -0.9854   | -33.9 | -0.9151   | -34.2 | 0    | -34.1 | 0    | -34   | 0 | -33.9 | 0 | -33.9 | 0 | -33.8 | 0 | -33.9 | 0 |
| -34.10000229 | -1.189000003       | -34                 | -1.1681            | -33.9              | -1.0779          | -33.8 | -0.9736   | -33.8 | -0.9085   | -34.1 | 0    | -34   | 0    | -33.9 | 0 | -33.8 | 0 | -33.8 | 0 | -33.7 | 0 | -33.8 | 0 |
| -34          | -1.183599971       | -33.89999771        | -1.158             | -33.8              | -1.0674          | -33.7 | -0.9634   | -33.7 | -0.8974   | -34   | 0    | -33.9 | 0    | -33.8 | 0 | -33.7 | 0 | -33.7 | 0 | -33.6 | 0 | -33.7 | 0 |
| -33.90000153 | -1.17449999        | -33.79999924        | -1.1468            | -33.7              | -1.0574          | -33.6 | -0.9552   | -33.6 | -0.8941   | -33.9 | 0    | -33.8 | 0    | -33.7 | 0 | -33.6 | 0 | -33.6 | 0 | -33.5 | 0 | -33.6 | 0 |
| -33.80000305 | -1.163600193       | -33.70000076        | -1.1364            | -33.6              | -1.043           | -33.5 | -0.9542   | -33.5 | -0.889    | -33.8 | 0    | -33.7 | 0    | -33.6 | 0 | -33.5 | 0 | -33.5 | 0 | -33.4 | 0 | -33.5 | 0 |
| -33.70000076 | -1.151999996       | -33.59999847        | -1.1248            | -33.5              | -1.0355          | -33.4 | -0.9488   | -33.4 | -0.8799   | -33.7 | 0    | -33.6 | 0    | -33.5 | 0 | -33.4 | 0 | -33.4 | 0 | -33.3 | 0 | -33.4 | 0 |
| -33.60000229 | -1.138099971       | -33.5               | -1.116             | -33.4              | -1.0284          | -33.3 | -0.9419   | -33.3 | -0.8708   | -33.6 | 0    | -33.5 | 0    | -33.4 | 0 | -33.3 | 0 | -33.3 | 0 | -33.2 | 0 | -33.3 | 0 |
| -33.5        | -1.130699996       | -33.39999771        | -1.1045            | -33.3              | -1.0232          | -33.2 | -0.9337   | -33.2 | -0.8644   | -33.5 | 0    | -33.4 | 0    | -33.3 | 0 | -33.2 | 0 | -33.2 | 0 | -33.1 | 0 | -33.2 | 0 |
| -33.40000153 | -1.120599972       | -33.29999924        | -1.0904            | -33.2              | -1.0119          | -33.1 | -0.9258   | -33.1 | -0.8566   | -33.4 | 0    | -33.3 | 0    | -33.2 | 0 | -33.1 | 0 | -33.1 | 0 | -33   | 0 | -33.1 | 0 |
| -33.30000305 | -1.108000093       | -33.20000076        | -1.0779            | -33.1              | -1.0027          | -33   | -0.9187   | -33   | -0.8478   | -33.3 | 0    | -33.2 | 0    | -33.1 | 0 | -33   | 0 | -33   | 0 | -32.9 | 0 | -33   | 0 |
| -33.20000076 | -1.097500025       | -33.09999847        | -1.0659            | -33                | -0.996           | -32.9 | -0.91     | -32.9 | -0.8372   | -33.2 | 0    | -33.1 | 0    | -33   | 0 | -32.9 | 0 | -32.9 | 0 | -32.8 | 0 | -32.9 | 0 |
| -33.10000229 | -1.087500027       | -33                 | -1.0574            | -32.9              | -0.9877          | -32.8 | -0.9023   | -32.8 | -0.829    | -33.1 | 0    | -33   | 0    | -32.9 | 0 | -32.8 | 0 | -32.8 | 0 | -32.7 | 0 | -32.8 | 0 |
| -33          | -1.078500006       | -32.89999771        | -1.0446            | -32.8              | -0.9758          | -32.7 | -0.8924   | -32.7 | -0.8208   | -33   | 0    | -32.9 | 0    | -32.8 | 0 | -32.7 | 0 | -32.7 | 0 | -32.6 | 0 | -32.7 | 0 |
| -32.90000153 | -1.067899994       | -32.79999924        | -1.0338            | -32.7              | -0.964           | -32.6 | -0.8773   | -32.6 | -0.8075   | -32.9 | 0    | -32.8 | 0    | -32.7 | 0 | -32.6 | 0 | -32.6 | 0 | -32.5 | 0 | -32.6 | 0 |
| -32.80000305 | -1.057000204       | -32.70000076        | -1.0201            | -32.6              | -0.9524          | -32.5 | -0.8705   | -32.5 | -0.7984   | -32.8 | 0    | -32.7 | 0    | -32.6 | 0 | -32.5 | 0 | -32.5 | 0 | -32.4 | 0 | -32.5 | 0 |
| -32.70000076 | -1.0493            | -32.59999847        | -1.0066            | -32.5              | -0.9415          | -32.4 | -0.8646   | -32.4 | -0.7896   | -32.7 | 0    | -32.6 | 0    | -32.5 | 0 | -32.4 | 0 | -32.4 | 0 | -32.3 | 0 | -32.4 | 0 |

|              |              |              |         |       |         |       |         |       |         |       |   |       |   |       |   |       |   |       |   |
|--------------|--------------|--------------|---------|-------|---------|-------|---------|-------|---------|-------|---|-------|---|-------|---|-------|---|-------|---|
| -27.60000229 | -0.716100079 | -27.5        | -0.6782 | -27.4 | -0.6113 | -27.3 | -0.603  | -27.3 | -0.5208 | -27.6 | 0 | -27.5 | 0 | -27.4 | 0 | -27.3 | 0 | -27.3 | 0 |
| -27.50000191 | -0.707400106 | -27.3999962  | -0.6708 | -27.3 | -0.6073 | -27.2 | -0.5972 | -27.2 | -0.5174 | -27.5 | 0 | -27.4 | 0 | -27.3 | 0 | -27.2 | 0 | -27.2 | 0 |
| -27.40000153 | -0.702999982 | -27.2999924  | -0.6664 | -27.2 | -0.6004 | -27.1 | -0.5899 | -27.1 | -0.5123 | -27.4 | 0 | -27.3 | 0 | -27.2 | 0 | -27.1 | 0 | -27.1 | 0 |
| -27.30000114 | -0.700099978 | -27.1999986  | -0.6579 | -27.1 | -0.5935 | -27   | -0.5823 | -27   | -0.5088 | -27.3 | 0 | -27.2 | 0 | -27.1 | 0 | -27   | 0 | -27   | 0 |
| -27.20000076 | -0.701799993 | -27.09999847 | -0.6559 | -27.1 | -0.5892 | -26.9 | -0.578  | -26.9 | -0.5078 | -27.2 | 0 | -27.1 | 0 | -27   | 0 | -26.9 | 0 | -26.9 | 0 |
| -27.10000229 | -0.701200048 | -27          | -0.6518 | -26.9 | -0.5884 | -26.8 | -0.5755 | -26.8 | -0.5027 | -27.1 | 0 | -27   | 0 | -26.9 | 0 | -26.8 | 0 | -26.8 | 0 |
| -27.00000191 | -0.702200057 | -26.8999962  | -0.6451 | -26.8 | -0.5842 | -26.7 | -0.5744 | -26.7 | -0.5007 | -27   | 0 | -26.9 | 0 | -26.8 | 0 | -26.7 | 0 | -26.7 | 0 |
| -26.90000153 | -0.699800013 | -26.7999924  | -0.6342 | -26.7 | -0.5835 | -26.6 | -0.5723 | -26.6 | -0.4989 | -26.9 | 0 | -26.8 | 0 | -26.7 | 0 | -26.6 | 0 | -26.6 | 0 |
| -26.80000114 | -0.693700002 | -26.6999986  | -0.6298 | -26.6 | -0.5847 | -26.5 | -0.564  | -26.5 | -0.4939 | -26.8 | 0 | -26.7 | 0 | -26.6 | 0 | -26.5 | 0 | -26.5 | 0 |
| -26.70000076 | -0.689099998 | -26.59999847 | -0.6248 | -26.5 | -0.5796 | -26.4 | -0.5579 | -26.4 | -0.4927 | -26.7 | 0 | -26.6 | 0 | -26.5 | 0 | -26.4 | 0 | -26.4 | 0 |
| -26.60000229 | -0.687000037 | -26.5        | -0.6232 | -26.4 | -0.5806 | -26.3 | -0.5499 | -26.3 | -0.489  | -26.6 | 0 | -26.5 | 0 | -26.4 | 0 | -26.3 | 0 | -26.3 | 0 |
| -26.50000191 | -0.684500086 | -26.3999962  | -0.6207 | -26.3 | -0.5733 | -26.2 | -0.5471 | -26.2 | -0.4906 | -26.5 | 0 | -26.4 | 0 | -26.3 | 0 | -26.2 | 0 | -26.2 | 0 |
| -26.40000153 | -0.681199993 | -26.2999924  | -0.6162 | -26.2 | -0.5689 | -26.1 | -0.5406 | -26.1 | -0.4886 | -26.4 | 0 | -26.3 | 0 | -26.2 | 0 | -26.1 | 0 | -26.1 | 0 |
| -26.30000114 | -0.678900025 | -26.1999986  | -0.6187 | -26.1 | -0.5608 | -26   | -0.5335 | -26   | -0.4837 | -26.3 | 0 | -26.2 | 0 | -26.1 | 0 | -26   | 0 | -26   | 0 |
| -26.20000076 | -0.676100005 | -26.09999847 | -0.6112 | -26   | -0.5545 | -25.9 | -0.527  | -25.9 | -0.4813 | -26.2 | 0 | -26.1 | 0 | -26   | 0 | -25.9 | 0 | -25.9 | 0 |
| -26.10000229 | -0.672500099 | -26          | -0.6044 | -25.9 | -0.5482 | -25.8 | -0.5195 | -25.8 | -0.4777 | -26.1 | 0 | -26   | 0 | -25.9 | 0 | -25.8 | 0 | -25.8 | 0 |
| -26.00000191 | -0.665600107 | -25.8999962  | -0.5997 | -25.8 | -0.5454 | -25.7 | -0.5164 | -25.7 | -0.4731 | -26   | 0 | -25.9 | 0 | -25.8 | 0 | -25.7 | 0 | -25.7 | 0 |
| -25.90000153 | -0.662200029 | -25.7999924  | -0.594  | -25.7 | -0.5395 | -25.6 | -0.5091 | -25.6 | -0.4663 | -25.9 | 0 | -25.8 | 0 | -25.7 | 0 | -25.6 | 0 | -25.6 | 0 |
| -25.80000114 | -0.658300024 | -25.6999986  | -0.5903 | -25.6 | -0.5312 | -25.5 | -0.5007 | -25.5 | -0.459  | -25.8 | 0 | -25.7 | 0 | -25.6 | 0 | -25.5 | 0 | -25.5 | 0 |
| -25.70000076 | -0.654800016 | -25.59999847 | -0.5846 | -25.5 | -0.5239 | -25.4 | -0.4951 | -25.4 | -0.4535 | -25.7 | 0 | -25.6 | 0 | -25.5 | 0 | -25.4 | 0 | -25.4 | 0 |
| -25.60000229 | -0.64770012  | -25.5        | -0.578  | -25.4 | -0.517  | -25.3 | -0.4857 | -25.3 | -0.4465 | -25.6 | 0 | -25.5 | 0 | -25.4 | 0 | -25.3 | 0 | -25.3 | 0 |
| -25.50000191 | -0.640500101 | -25.3999962  | -0.5727 | -25.3 | -0.511  | -25.2 | -0.483  | -25.2 | -0.4451 | -25.5 | 0 | -25.4 | 0 | -25.3 | 0 | -25.2 | 0 | -25.2 | 0 |
| -25.40000153 | -0.631600003 | -25.2999924  | -0.5654 | -25.2 | -0.5095 | -25.1 | -0.4802 | -25.1 | -0.4445 | -25.4 | 0 | -25.3 | 0 | -25.2 | 0 | -25.1 | 0 | -25.1 | 0 |
| -25.30000114 | -0.625199974 | -25.1999986  | -0.5655 | -25.1 | -0.5087 | -25   | -0.4756 | -25   | -0.4422 | -25.3 | 0 | -25.2 | 0 | -25.1 | 0 | -25   | 0 | -25   | 0 |
| -25.20000076 | -0.622399973 | -25.09999847 | -0.5623 | -25   | -0.507  | -24.9 | -0.4688 | -24.9 | -0.4308 | -25.2 | 0 | -25.1 | 0 | -25   | 0 | -24.9 | 0 | -24.9 | 0 |
| -25.10000229 | -0.621300068 | -25          | -0.5606 | -24.9 | -0.4971 | -24.8 | -0.4627 | -24.8 | -0.4253 | -25.1 | 0 | -25   | 0 | -24.9 | 0 | -24.8 | 0 | -24.8 | 0 |
| -25.00000191 | -0.616400106 | -24.8999962  | -0.555  | -24.8 | -0.4885 | -24.7 | -0.4582 | -24.7 | -0.425  | -25   | 0 | -24.9 | 0 | -24.8 | 0 | -24.7 | 0 | -24.7 | 0 |
| -24.90000153 | -0.612899978 | -24.7999924  | -0.5481 | -24.7 | -0.483  | -24.6 | -0.4558 | -24.6 | -0.4193 | -24.9 | 0 | -24.8 | 0 | -24.7 | 0 | -24.6 | 0 | -24.6 | 0 |
| -24.80000114 | -0.606600019 | -24.6999986  | -0.5449 | -24.6 | -0.4751 | -24.5 | -0.4466 | -24.5 | -0.4107 | -24.8 | 0 | -24.7 | 0 | -24.6 | 0 | -24.5 | 0 | -24.5 | 0 |
| -24.70000076 | -0.604199972 | -24.59999847 | -0.541  | -24.5 | -0.4685 | -24.4 | -0.44   | -24.4 | -0.4083 | -24.7 | 0 | -24.6 | 0 | -24.5 | 0 | -24.4 | 0 | -24.4 | 0 |
| -24.60000229 | -0.599300132 | -24.5        | -0.5298 | -24.4 | -0.4644 | -24.3 | -0.4352 | -24.3 | -0.4048 | -24.6 | 0 | -24.5 | 0 | -24.4 | 0 | -24.3 | 0 | -24.3 | 0 |
| -24.50000191 | -0.589200142 | -24.3999962  | -0.5274 | -24.3 | -0.4599 | -24.2 | -0.429  | -24.2 | -0.4005 | -24.5 | 0 | -24.4 | 0 | -24.3 | 0 | -24.2 | 0 | -24.2 | 0 |
| -24.40000153 | -0.579199975 | -24.2999924  | -0.5241 | -24.2 | -0.4611 | -24.1 | -0.4239 | -24.1 | -0.3994 | -24.4 | 0 | -24.3 | 0 | -24.2 | 0 | -24.1 | 0 | -24.1 | 0 |
| -24.30000114 | -0.57320002  | -24.1999986  | -0.521  | -24.1 | -0.4622 | -24   | -0.4242 | -24   | -0.3932 | -24.3 | 0 | -24.2 | 0 | -24.1 | 0 | -24   | 0 | -24   | 0 |
| -24.20000076 | -0.569600002 | -24.09999847 | -0.5139 | -24   | -0.4609 | -23.9 | -0.4207 | -23.9 | -0.388  | -24.2 | 0 | -24.1 | 0 | -24   | 0 | -23.9 | 0 | -23.9 | 0 |
| -24.10000229 | -0.56740008  | -24          | -0.5113 | -23.9 | -0.4559 | -23.8 | -0.416  | -23.8 | -0.3883 | -24.1 | 0 | -24   | 0 | -23.9 | 0 | -23.8 | 0 | -23.8 | 0 |
| -24.00000191 | -0.565700042 | -23.8999962  | -0.504  | -23.8 | -0.4512 | -23.7 | -0.4091 | -23.7 | -0.3862 | -24   | 0 | -23.9 | 0 | -23.8 | 0 | -23.7 | 0 | -23.7 | 0 |
| -23.90000153 | -0.558200013 | -23.7999924  | -0.4996 | -23.7 | -0.4486 | -23.6 | -0.4116 | -23.6 | -0.3836 | -23.9 | 0 | -23.8 | 0 | -23.7 | 0 | -23.6 | 0 | -23.6 | 0 |
| -23.80000114 | -0.554500009 | -23.6999986  | -0.4944 | -23.6 | -0.4482 | -23.5 | -0.4067 | -23.5 | -0.3788 | -23.8 | 0 | -23.7 | 0 | -23.6 | 0 | -23.5 | 0 | -23.5 | 0 |
| -23.70000076 | -0.550600001 | -23.59999847 | -0.4938 | -23.5 | -0.4411 | -23.4 | -0.4001 | -23.4 | -0.3725 | -23.7 | 0 | -23.6 | 0 | -23.5 | 0 | -23.4 | 0 | -23.4 | 0 |
| -23.60000229 | -0.549000046 | -23.5        | -0.486  | -23.4 | -0.4336 | -23.3 | -0.3927 | -23.3 | -0.3644 | -23.6 | 0 | -23.5 | 0 | -23.4 | 0 | -23.3 | 0 | -23.3 | 0 |
| -23.50000191 | -0.53950001  | -23.3999962  | -0.4787 | -23.3 | -0.4281 | -23.2 | -0.3892 | -23.2 | -0.3643 | -23.5 | 0 | -23.4 | 0 | -23.3 | 0 | -23.2 | 0 | -23.2 | 0 |
| -23.40000153 | -0.532499975 | -23.2999924  | -0.4711 | -23.2 | -0.4256 | -23.1 | -0.3854 | -23.1 | -0.3607 | -23.4 | 0 | -23.3 | 0 | -23.2 | 0 | -23.1 | 0 | -23.1 | 0 |
| -23.30000114 | -0.521099999 | -23.1999986  | -0.4698 | -23.1 | -0.4171 | -23   | -0.3776 | -23   | -0.3569 | -23.3 | 0 | -23.2 | 0 | -23.1 | 0 | -23   | 0 | -23   | 0 |
| -23.20000076 | -0.517300001 | -23.09999847 | -0.4661 | -23   | -0.4095 | -22.9 | -0.3711 | -22.9 | -0.3525 | -23.2 | 0 | -23.1 | 0 | -23   | 0 | -22.9 | 0 | -22.9 | 0 |
| -23.10000229 | -0.514900085 | -23          | -0.4601 | -22.9 | -0.4037 | -22.8 | -0.366  | -22.8 | -0.348  | -23.1 | 0 | -23   | 0 | -22.9 | 0 | -22.8 | 0 | -22.8 | 0 |
| -23.00000191 | -0.512900067 | -22.8999962  | -0.4527 | -22.8 | -0.4016 | -22.7 | -0.3608 | -22.7 | -0.3437 | -23   | 0 | -22.9 | 0 | -22.8 | 0 | -22.7 | 0 | -22.7 | 0 |
| -22.90000153 | -0.511899994 | -22.7999924  | -0.4494 | -22.7 | -0.398  | -22.6 | -0.3521 | -22.6 | -0.3361 | -22.9 | 0 | -22.8 | 0 | -22.7 | 0 | -22.6 | 0 | -22.6 | 0 |
| -22.80000114 | -0.509399993 | -22.6999986  | -0.443  | -22.6 | -0.3859 | -22.5 | -0.3466 | -22.5 | -0.3345 | -22.8 | 0 | -22.7 | 0 | -22.6 | 0 | -22.5 | 0 | -22.5 | 0 |
| -22.70000076 | -0.503999986 | -22.59999847 | -0.4371 | -22.5 | -0.384  | -22.4 | -0.3425 | -22.4 | -0.3335 | -22.7 | 0 | -22.6 | 0 | -22.5 | 0 | -22.4 | 0 | -22.4 | 0 |
| -22.60000229 | -0.491500161 | -22.5        | -0.4351 | -22.4 | -0.3818 | -22.3 | -0.3283 | -22.3 | -0.3297 | -22.6 | 0 | -22.5 | 0 | -22.4 | 0 | -22.3 | 0 | -22.3 | 0 |
| -22.50000191 | -0.486100119 | -22.3999962  | -0.4336 | -22.3 | -0.3769 | -22.2 | -0.3195 | -22.2 | -0.3249 | -22.5 | 0 | -22.4 | 0 | -22.3 | 0 | -22.2 | 0 | -22.2 | 0 |
| -22.40000153 | -0.48280001  | -22.2999924  | -0.4289 | -22.2 | -0.3759 | -22.1 | -0.3088 | -22.1 | -0.3194 | -22.4 | 0 | -22.3 | 0 | -22.2 | 0 | -22.1 | 0 | -22.1 | 0 |
| -22.30000114 | -0.466499989 | -22.1999986  | -0.4235 | -22.1 | -0.373  | -22   | -0.3038 | -22   | -0.3162 | -22.3 | 0 | -22.2 | 0 | -22.1 | 0 | -22   | 0 | -22   | 0 |
| -22.20000076 | -0.461099999 | -22.09999847 | -0.4086 | -22   | -0.3631 | -21.9 | -0.3015 | -21.9 | -0.3122 | -22.2 | 0 | -22.1 | 0 | -22   | 0 | -21.9 | 0 | -21.9 | 0 |
| -22.10000229 | -0.453900223 | -22          | -0.4008 | -21.9 | -0.3588 | -21.8 | -0.2934 | -21.8 | -0.3044 | -22.1 | 0 | -22   | 0 | -21.9 | 0 | -21.8 | 0 | -21.8 | 0 |
| -22.00000191 | -0.450000007 | -21.8999962  | -0.3901 | -21.8 | -0.3441 | -21.7 | -0.2833 | -21.7 | -0.2942 | -22   | 0 | -21.9 | 0 | -21.8 | 0 | -21.7 | 0 | -21.7 | 0 |
| -21.90000153 | -0.444899999 | -21.7999924  | -0.3715 | -21.7 | -0.3302 | -21.6 | -0.2769 | -21.6 | -0.2817 | -21.9 | 0 | -21.8 | 0 | -21.7 | 0 | -21.6 | 0 | -21.6 | 0 |
| -21.80000114 | -0.437099997 | -21.6999986  | -0.3523 | -21.6 | -0.3281 | -21.5 | -0.2754 | -21.5 | -0.284  | -21.8 | 0 | -21.7 | 0 | -21.6 | 0 | -21.5 | 0 | -21.5 | 0 |
| -21.70000076 | -0.438700009 | -21.59999847 | -0.3467 | -21.5 | -0.3379 | -21.4 | -0.2857 | -21.4 | -0.2944 | -21.7 | 0 | -21.6 | 0 | -21.5 | 0 | -21.4 | 0 | -21.4 | 0 |
| -21.60000229 | -0.443200042 | -21.5        | -0.3559 | -21.4 | -0.3493 | -21.3 | -0.2866 | -21.3 | -0.3044 | -21.6 | 0 | -21.5 | 0 | -21.4 | 0 | -21.3 | 0 | -21.3 | 0 |
| -21.50000191 | -0.45029982  | -21.3999962  | -0.3665 | -21.3 | -0.3567 | -21.2 | -0.3015 | -21.2 | -0.3145 | -21.5 | 0 | -21.4 | 0 | -21.3 | 0 | -21.2 | 0 | -21.2 | 0 |
| -21.40000153 | -0.456999996 | -21.2999924  | -0.3786 | -21.2 | -0.3625 | -21.1 | -0.3176 | -21.1 | -0.3195 | -21.4 | 0 | -21.3 | 0 | -21.2 | 0 | -21.1 | 0 | -21.1 | 0 |
| -21.30000114 | -0.464499987 | -21.1999986  | -0.3853 | -21.1 | -0.3652 |       |         |       |         |       |   |       |   |       |   |       |   |       |   |

|              |              |             |         |           |         |           |         |           |          |           |   |           |   |           |   |           |   |           |   |
|--------------|--------------|-------------|---------|-----------|---------|-----------|---------|-----------|----------|-----------|---|-----------|---|-----------|---|-----------|---|-----------|---|
| -16.10000229 | -0.293100156 | -16         | -0.1931 | -15.9     | -0.2129 | -15.8     | -0.1806 | -15.8     | -0.1473  | -16.1     | 0 | -16       | 0 | -15.9     | 0 | -15.8     | 0 | -15.8     | 0 |
| -16.00000191 | -0.278600172 | -15.8999962 | -0.1864 | -15.8     | -0.2207 | -15.7     | -0.1651 | -15.7     | -0.1422  | -16       | 0 | -15.9     | 0 | -15.8     | 0 | -15.7     | 0 | -15.7     | 0 |
| -15.90000153 | -0.274099999 | -15.7999924 | -0.1804 | -15.7     | -0.2127 | -15.6     | -0.1526 | -15.6     | -0.1372  | -15.9     | 0 | -15.8     | 0 | -15.6     | 0 | -15.6     | 0 | -15.6     | 0 |
| -15.80000114 | -0.266700006 | -15.6999886 | -0.1661 | -15.6     | -0.2077 | -15.5     | -0.1424 | -15.5     | -0.1299  | -15.8     | 0 | -15.7     | 0 | -15.6     | 0 | -15.5     | 0 | -15.5     | 0 |
| -15.70000076 | -0.247800001 | -15.5999847 | -0.1522 | -15.5     | -0.1967 | -15.4     | -0.1357 | -15.4     | -0.1255  | -15.7     | 0 | -15.6     | 0 | -15.5     | 0 | -15.4     | 0 | -15.4     | 0 |
| -15.60000229 | -0.236700285 | -15.5       | -0.1421 | -15.4     | -0.1903 | -15.3     | -0.1329 | -15.3     | -0.1195  | -15.6     | 0 | -15.5     | 0 | -15.4     | 0 | -15.3     | 0 | -15.3     | 0 |
| -15.50000191 | -0.227800225 | -15.3999962 | -0.1306 | -15.3     | -0.1824 | -15.2     | -0.134  | -15.2     | -0.1151  | -15.5     | 0 | -15.4     | 0 | -15.3     | 0 | -15.2     | 0 | -15.2     | 0 |
| -15.40000153 | -0.222900005 | -15.2999924 | -0.1256 | -15.2     | -0.1812 | -15.1     | -0.1379 | -15.1     | -0.1148  | -15.4     | 0 | -15.3     | 0 | -15.2     | 0 | -15.1     | 0 | -15.1     | 0 |
| -15.30000114 | -0.2154      | -15.1999886 | -0.1228 | -15.1     | -0.1814 | -15       | -0.1379 | -15       | -0.1103  | -15.3     | 0 | -15.2     | 0 | -15.1     | 0 | -15       | 0 | -15       | 0 |
| -15.20000076 | -0.213199999 | -15.0999847 | -0.1226 | -15       | -0.177  | -14.9     | -0.1397 | -14.9     | -0.1054  | -15.2     | 0 | -15.1     | 0 | -15       | 0 | -14.9     | 0 | -14.9     | 0 |
| -15.10000229 | -0.215800012 | -15         | -0.1162 | -14.9     | -0.1761 | -14.8     | -0.1374 | -14.8     | -0.1054  | -15.1     | 0 | -15       | 0 | -14.9     | 0 | -14.8     | 0 | -14.8     | 0 |
| -15.00000191 | -0.21410007  | -14.8999962 | -0.1148 | -14.8     | -0.1738 | -14.7     | -0.1356 | -14.7     | -0.1024  | -15       | 0 | -14.9     | 0 | -14.8     | 0 | -14.7     | 0 | -14.7     | 0 |
| -14.90000153 | -0.209999999 | -14.7999924 | -0.1142 | -14.7     | -0.1667 | -14.6     | -0.1356 | -14.6     | -0.0952  | -14.9     | 0 | -14.8     | 0 | -14.7     | 0 | -14.6     | 0 | -14.6     | 0 |
| -14.80000114 | -0.203000001 | -14.6999886 | -0.1073 | -14.6     | -0.1622 | -14.5     | -0.1274 | -14.5     | -0.0877  | -14.8     | 0 | -14.7     | 0 | -14.6     | 0 | -14.5     | 0 | -14.5     | 0 |
| -14.70000076 | -0.196999995 | -14.5999847 | -0.1082 | -14.5     | -0.1568 | -14.4     | -0.1275 | -14.4     | -0.0846  | -14.7     | 0 | -14.6     | 0 | -14.5     | 0 | -14.4     | 0 | -14.4     | 0 |
| -14.60000229 | -0.196300026 | -14.5       | -0.1058 | -14.4     | -0.1537 | -14.3     | -0.1291 | -14.3     | -0.0828  | -14.6     | 0 | -14.5     | 0 | -14.4     | 0 | -14.3     | 0 | -14.3     | 0 |
| -14.50000191 | -0.190500093 | -14.3999962 | -0.1033 | -14.3     | -0.1525 | -14.2     | -0.1362 | -14.2     | -0.0848  | -14.5     | 0 | -14.4     | 0 | -14.3     | 0 | -14.2     | 0 | -14.2     | 0 |
| -14.40000153 | -0.188900005 | -14.2999924 | -0.106  | -14.2     | -0.1526 | -14.1     | -0.1396 | -14.1     | -0.085   | -14.4     | 0 | -14.3     | 0 | -14.2     | 0 | -14.1     | 0 | -14.1     | 0 |
| -14.30000114 | -0.187900003 | -14.1999886 | -0.1114 | -14.1     | -0.154  | -14       | -0.1353 | -14       | -0.08    | -14.3     | 0 | -14.2     | 0 | -14.1     | 0 | -14       | 0 | -14       | 0 |
| -14.20000076 | -0.197300004 | -14.0999847 | -0.1171 | -14       | -0.1458 | -13.9     | -0.138  | -13.9     | -0.0757  | -14.2     | 0 | -14.1     | 0 | -14       | 0 | -13.9     | 0 | -13.9     | 0 |
| -14.10000229 | -0.208699934 | -14         | -0.1206 | -13.9     | -0.1483 | -13.8     | -0.1264 | -13.8     | -0.074   | -14.1     | 0 | -14       | 0 | -13.9     | 0 | -13.8     | 0 | -13.8     | 0 |
| -14.00000191 | -0.201200028 | -13.8999962 | -0.1191 | -13.8     | -0.147  | -13.7     | -0.1251 | -13.7     | -0.075   | -14       | 0 | -13.9     | 0 | -13.8     | 0 | -13.7     | 0 | -13.7     | 0 |
| -13.90000153 | -0.198800001 | -13.7999924 | -0.1155 | -13.7     | -0.1472 | -13.6     | -0.126  | -13.6     | -0.0779  | -13.9     | 0 | -13.8     | 0 | -13.7     | 0 | -13.6     | 0 | -13.6     | 0 |
| -13.80000114 | -0.197899993 | -13.6999886 | -0.1176 | -13.6     | -0.1434 | -13.5     | -0.1317 | -13.5     | -0.0778  | -13.8     | 0 | -13.7     | 0 | -13.6     | 0 | -13.5     | 0 | -13.5     | 0 |
| -13.70000076 | -0.200600002 | -13.5999847 | -0.1158 | -13.5     | -0.1382 | -13.4     | -0.1275 | -13.4     | -0.0677  | -13.7     | 0 | -13.6     | 0 | -13.5     | 0 | -13.4     | 0 | -13.4     | 0 |
| -13.60000229 | -0.192599978 | -13.5       | -0.1071 | -13.4     | -0.1286 | -13.3     | -0.1189 | -13.3     | -0.0596  | -13.6     | 0 | -13.5     | 0 | -13.4     | 0 | -13.3     | 0 | -13.3     | 0 |
| -13.50000191 | -0.192200004 | -13.3999962 | -0.1023 | -13.3     | -0.1231 | -13.2     | -0.111  | -13.2     | -0.0494  | -13.5     | 0 | -13.4     | 0 | -13.3     | 0 | -13.2     | 0 | -13.2     | 0 |
| -13.40000153 | -0.184899999 | -13.2999924 | -0.1058 | -13.2     | -0.1198 | -13.1     | -0.1071 | -13.1     | -0.0436  | -13.4     | 0 | -13.3     | 0 | -13.2     | 0 | -13.1     | 0 | -13.1     | 0 |
| -13.30000114 | -0.165199995 | -13.1999886 | -0.1073 | -13.1     | -0.1182 | -13       | -0.0976 | -13       | -0.0352  | -13.3     | 0 | -13.2     | 0 | -13.1     | 0 | -13       | 0 | -13       | 0 |
| -13.20000076 | -0.1443      | -13.0999847 | -0.1049 | -13       | -0.114  | -12.9     | -0.0891 | -12.9     | -0.0237  | -13.2     | 0 | -13.1     | 0 | -13       | 0 | -12.9     | 0 | -12.9     | 0 |
| -13.10000229 | -0.132400157 | -13         | -0.097  | -12.9     | -0.1151 | -12.8     | -0.0786 | -12.8     | -0.0147  | -13.1     | 0 | -13       | 0 | -12.9     | 0 | -12.8     | 0 | -12.8     | 0 |
| -13.00000191 | -0.118300218 | -12.8999962 | -0.0853 | -12.8     | -0.1186 | -12.7     | -0.0769 | -12.7     | -0.014   | -13       | 0 | -12.9     | 0 | -12.8     | 0 | -12.7     | 0 | -12.7     | 0 |
| -12.90000153 | -0.104200004 | -12.7999924 | -0.0753 | -12.7     | -0.1227 | -12.6     | -0.0812 | -12.6     | -0.0126  | -12.9     | 0 | -12.8     | 0 | -12.7     | 0 | -12.6     | 0 | -12.6     | 0 |
| -12.80000114 | -0.092899994 | -12.6999886 | -0.0743 | -12.6     | -0.119  | -12.5     | -0.0878 | -12.5     | -0.0186  | -12.8     | 0 | -12.7     | 0 | -12.6     | 0 | -12.5     | 0 | -12.5     | 0 |
| -12.70000076 | -0.088299998 | -12.5999847 | -0.0705 | -12.5     | -0.1136 | -12.4     | -0.0861 | -12.4     | -0.015   | -12.7     | 0 | -12.6     | 0 | -12.5     | 0 | -12.4     | 0 | -12.4     | 0 |
| -12.60000229 | -0.089899993 | -12.5       | -0.0807 | -12.4     | -0.1058 | -12.3     | -0.085  | -12.3     | -0.0097  | -12.6     | 0 | -12.5     | 0 | -12.4     | 0 | -12.3     | 0 | -12.3     | 0 |
| -12.50000191 | -0.0699998   | -12.3999962 | -0.0824 | -12.3     | -0.0988 | -12.2     | -0.0862 | -12.2     | -0.0071  | -12.5     | 0 | -12.4     | 0 | -12.3     | 0 | -12.2     | 0 | -12.2     | 0 |
| -12.40000153 | -0.098399994 | -12.2999924 | -0.0847 | -12.2     | -0.0939 | -12.1     | -0.0804 | -12.1     | -0.0066  | -12.4     | 0 | -12.3     | 0 | -12.2     | 0 | -12.1     | 0 | -12.1     | 0 |
| -12.30000114 | -0.100500002 | -12.1999886 | -0.0842 | -12.1     | -0.0819 | -12       | -0.0715 | -12       | -0.001   | -12.3     | 0 | -12.2     | 0 | -12.1     | 0 | -12       | 0 | -12       | 0 |
| -12.20000076 | -0.102500005 | -12.0999847 | -0.0767 | -12       | -0.073  | -11.9     | -0.0701 | -11.9     | 0.0004   | -12.2     | 0 | -12.1     | 0 | -12       | 0 | -11.9     | 0 | -11.9     | 0 |
| -12.10000229 | -0.093800036 | -12         | -0.0734 | -11.9     | -0.0744 | -11.8     | -0.0734 | -11.8     | -0.0015  | -12.1     | 0 | -12       | 0 | -11.9     | 0 | -11.8     | 0 | -11.8     | 0 |
| -12.00000191 | -0.087800032 | -11.8999962 | -0.0737 | -11.8     | -0.0729 | -11.7     | -0.0718 | -11.7     | 0.004    | -12       | 0 | -11.9     | 0 | -11.8     | 0 | -11.7     | 0 | -11.7     | 0 |
| -11.90000153 | -0.090599996 | -11.7999924 | -0.0755 | -11.7     | -0.0679 | -11.6     | -0.0656 | -11.6     | 0.005    | -11.9     | 0 | -11.8     | 0 | -11.7     | 0 | -11.6     | 0 | -11.6     | 0 |
| -11.80000114 | -0.090500003 | -11.6999886 | -0.0696 | -11.6     | -0.0691 | -11.5     | -0.0543 | -11.5     | 0.0109   | -11.8     | 0 | -11.7     | 0 | -11.6     | 0 | -11.5     | 0 | -11.5     | 0 |
| -11.70000076 | -0.093599994 | -11.5999847 | -0.0662 | -11.5     | -0.0731 | -11.4     | -0.0543 | -11.4     | 0.0047   | -11.7     | 0 | -11.6     | 0 | -11.5     | 0 | -11.4     | 0 | -11.4     | 0 |
| -11.60000229 | -0.093699939 | -11.5       | -0.0652 | -11.4     | -0.077  | -11.3     | -0.0558 | -11.3     | -0.003   | -11.6     | 0 | -11.5     | 0 | -11.4     | 0 | -11.3     | 0 | -11.3     | 0 |
| -11.50000191 | -0.090099977 | -11.3999962 | -0.0689 | -11.3     | -0.0863 | -11.2     | -0.0498 | -11.2     | -0.0065  | -11.5     | 0 | -11.4     | 0 | -11.3     | 0 | -11.2     | 0 | -11.2     | 0 |
| -11.40000153 | -0.095500001 | -11.2999924 | -0.0732 | -11.2     | -0.0841 | -11.1     | -0.0457 | -11.1     | -0.0073  | -11.4     | 0 | -11.3     | 0 | -11.2     | 0 | -11.1     | 0 | -11.1     | 0 |
| -11.30000114 | -0.090999994 | -11.1999886 | -0.0736 | -11.1     | -0.0817 | -11       | -0.0429 | -11       | -0.0086  | -11.3     | 0 | -11.2     | 0 | -11.1     | 0 | -11       | 0 | -11       | 0 |
| -11.20000076 | -0.091699997 | -11.0999847 | -0.0711 | -11       | -0.0763 | -10.9     | -0.0363 | -10.9     | -0.0058  | -11.2     | 0 | -11.1     | 0 | -11       | 0 | -10.9     | 0 | -10.9     | 0 |
| -11.10000229 | -0.087400059 | -11         | -0.0654 | -10.9     | -0.07   | -10.8     | -0.0302 | -10.8     | -0.0062  | -11.1     | 0 | -11       | 0 | -10.9     | 0 | -10.8     | 0 | -10.8     | 0 |
| -11.00000191 | -0.083400089 | -10.8999962 | -0.0601 | -10.8     | -0.059  | -10.7     | -0.0212 | -10.7     | 6.38E-08 | -11       | 0 | -10.9     | 0 | -10.8     | 0 | -10.7     | 0 | -10.7     | 0 |
| -10.90000153 | -0.077400001 | -10.7999924 | -0.0529 | -10.7     | -0.0479 | -10.6     | -0.0091 | -10.6     | 0.0035   | -10.9     | 0 | -10.8     | 0 | -10.7     | 0 | -10.6     | 0 | -10.6     | 0 |
| -10.80000114 | -0.071700001 | -10.6999886 | -0.0483 | -10.6     | -0.0457 | -10.5     | -0.0011 | -10.5     | 0.0099   | -10.8     | 0 | -10.7     | 0 | -10.6     | 0 | -10.5     | 0 | -10.5     | 0 |
| -10.70000076 | -0.063999996 | -10.5999847 | -0.0476 | -10.5     | -0.0483 | -10.4     | 0.0038  | -10.4     | 0.0117   | -10.7     | 0 | -10.6     | 0 | -10.5     | 0 | -10.4     | 0 | -10.4     | 0 |
| -10.60000229 | -0.065200064 | -10.5       | -0.0458 | -10.4     | -0.0441 | -10.3     | 0.0071  | -10.3     | 0.0161   | -10.6     | 0 | -10.5     | 0 | -10.4     | 0 | -10.3     | 0 | -10.3     | 0 |
| -10.50000191 | -0.060000087 | -10.3999962 | -0.0429 | -10.3     | -0.0385 | -10.2     | 0.0095  | -10.2     | 0.0159   | -10.5     | 0 | -10.4     | 0 | -10.3     | 0 | -10.2     | 0 | -10.2     | 0 |
| -10.40000153 | -0.058900002 | -10.2999924 | -0.0402 | -10.2     | -0.0367 | -10.1     | 0.0175  | -10.1     | 0.0191   | -10.4     | 0 | -10.3     | 0 | -10.2     | 0 | -10.1     | 0 | -10.1     | 0 |
| -10.30000114 | -0.0583      | -10.1999886 | -0.0366 | -10.1     | -0.0298 | -9.999998 | 0.0188  | -9.999998 | 0.0227   | -10.3     | 0 | -10.2     | 0 | -10.1     | 0 | -10       | 0 | -10       | 0 |
| -10.20000076 | -0.055300005 | -10.0999847 | -0.0312 | -10       | -0.0258 | -9.899998 | 0.0166  | -9.899998 | 0.0171   | -10.2     | 0 | -10.1     | 0 | -10       | 0 | -9.900002 | 0 | -9.900002 | 0 |
| -10.10000229 | -0.04570009  | -10         | -0.0268 | -9.900002 | -0.0279 | -9.799999 | 0.0129  | -9.799999 | 0.0178   | -10.1     | 0 | -10       | 0 | -9.900002 | 0 | -9.800001 | 0 | -9.800001 | 0 |
| -10.00000191 | -0.042700007 | -9.89999619 | -0.0284 | -9.800001 | -0.0329 | -9.699999 | 0.0064  | -9.699999 | 0.0118   | -10       | 0 | -9.900002 | 0 | -9.800001 | 0 | -9.700001 | 0 | -9.700001 | 0 |
| -9.900001526 | -0.045999999 | -9.79999237 | -0.0321 | -9.700001 | -0.0328 | -9.599998 | 0.0048  | -9.599998 | 0.0103   | -9.900002 | 0 | -9.800001 | 0 | -9.700001 | 0 | -9.600002 | 0 | -9.600002 | 0 |
| -9.80000114  | -0.0475      | -9.69999856 | -0.0375 | -9.6      | -0.0    |           |         |           |          |           |   |           |   |           |   |           |   |           |   |

|             |             |              |          |           |          |           |          |           |          |          |          |          |          |          |          |          |          |          |          |          |          |
|-------------|-------------|--------------|----------|-----------|----------|-----------|----------|-----------|----------|----------|----------|----------|----------|----------|----------|----------|----------|----------|----------|----------|----------|
| -4.60002289 | 0.02030001  | -4.5         | 0.0261   | -4.40002  | 0.0302   | -4.299999 | 0.0231   | -4.299999 | 0.03     | -4.60002 | 0        | -4.5     | 0        | -4.40002 | 0        | -4.30003 | 0        | -4.30003 | 0        |          |          |
| -4.5        | 0.02110001  | -4.39997711  | 0.0247   | -4.299999 | 0.0309   | -4.199997 | 0.0176   | -4.199997 | 0.0259   | -4.5     | 0        | -4.40002 | 0        | -4.30003 | 0        | -4.20001 | 0        | -4.20001 | 0        |          |          |
| -4.40001526 | 0.02280001  | -4.29999237  | 0.0255   | -4.200001 | 0.0287   | -4.099998 | 0.0149   | -4.099998 | 0.0213   | -4.40002 | 0        | -4.30003 | 0        | -4.20001 | 0        | -4.10002 | 0        | -4.10002 | 0        |          |          |
| -4.30003052 | 0.024199828 | -4.20000763  | 0.0222   | -4.100002 | 0.0292   | -4        | 0.0158   | -4        | 0.0187   | -4.30003 | 0        | -4.20001 | 0        | -4.10002 | 0        | -4       | 0        | -4       | 0        |          |          |
| -4.20000763 | 0.02430001  | -4.099998474 | 0.021    | -4        | 0.0308   | -3.899998 | 0.0174   | -3.899998 | 0.0195   | -4.20001 | 0        | -4.10002 | 0        | -4       | 0        | -3.90002 | 0        | -3.90002 | 0        |          |          |
| -4.10002289 | 0.02600001  | -4           | 0.0248   | -3.900002 | 0.0313   | -3.799999 | 0.0172   | -3.799999 | 0.0175   | -4.10002 | 0        | -4       | 0        | -3.90002 | 0        | -3.80003 | 0        | -3.80003 | 0        |          |          |
| -4          | 0.03050001  | -3.89997711  | 0.0245   | -3.799999 | 0.0374   | -3.699997 | 0.0181   | -3.699997 | 0.0174   | -4       | 0        | -3.90002 | 0        | -3.80003 | 0        | -3.70001 | 0        | -3.70001 | 0        |          |          |
| -3.90001526 | 0.03500001  | -3.79999237  | 0.0296   | -3.700001 | 0.043    | -3.599998 | 0.0179   | -3.599998 | 0.0215   | -3.90002 | 0        | -3.80003 | 0        | -3.70001 | 0        | -3.60002 | 0        | -3.60002 | 0        |          |          |
| -3.80003052 | 0.03589942  | -3.70000763  | 0.0361   | -3.600002 | 0.0445   | -3.5      | 0.0206   | -3.5      | 0.0309   | -3.80003 | 0        | -3.70001 | 0        | -3.60002 | 0        | -3.5     | 0        | -3.5     | 0        |          |          |
| -3.70000763 | 0.0406      | -3.599998474 | 0.0319   | -3.5      | 0.0416   | -3.399998 | 0.0298   | -3.399998 | 0.0327   | -3.70001 | 0        | -3.60002 | 0        | -3.5     | 0        | -3.40002 | 0        | -3.40002 | 0        |          |          |
| -3.60002289 | 0.04699999  | -3.5         | 0.0325   | -3.400002 | 0.0452   | -3.299999 | 0.0304   | -3.299999 | 0.0353   | -3.60002 | 0        | -3.5     | 0        | -3.40002 | 0        | -3.30003 | 0        | -3.30003 | 0        |          |          |
| -3.5        | 0.05169998  | -3.39997711  | 0.0452   | -3.299999 | 0.0486   | -3.199997 | 0.0357   | -3.199997 | 0.034    | -3.5     | 0        | -3.40002 | 0        | -3.30003 | 0        | -3.20001 | 0        | -3.20001 | 0        |          |          |
| -3.40001526 | 0.05840003  | -3.29999237  | 0.0474   | -3.200001 | 0.0497   | -3.099998 | 0.0358   | -3.099998 | 0.034    | -3.40002 | 0        | -3.30003 | 0        | -3.20001 | 0        | -3.10002 | 0        | -3.10002 | 0        |          |          |
| -3.30003052 | 0.060299816 | -3.20000763  | 0.0549   | -3.100002 | 0.049    | -3        | 0.0181   | -3        | 0.0167   | -3.30003 | 0        | -3.20001 | 0        | -3.10002 | 0        | -3       | 0        | -3       | 0        |          |          |
| -3.20000763 | 0.06400001  | -3.099998474 | 0.0656   | -3        | 0.0399   | -2.899998 | 0.004    | -2.899998 | 0.0104   | -3.20001 | 0        | -3.10002 | 0        | -3       | 0        | -2.90002 | 0        | -2.90002 | 0        |          |          |
| -3.10002289 | 0.071600002 | -3           | 0.0658   | -2.900002 | 0.032    | -2.799999 | 0.0089   | -2.799999 | 0.008    | -3.10002 | 0        | -3       | 0        | -2.90002 | 0        | -2.80003 | 0        | -2.80003 | 0        |          |          |
| -3          | 0.06640001  | -2.89997711  | 0.0608   | -2.799999 | 0.0291   | -2.699997 | 0.0114   | -2.699997 | 0.0135   | -3       | 0        | -2.90002 | 0        | -2.80003 | 0        | -2.70001 | 0        | -2.70001 | 0        |          |          |
| -2.90001526 | 0.06179997  | -2.79999237  | 0.0636   | -2.700001 | 0.0344   | -2.599998 | 0.0113   | -2.599998 | 0.0162   | -2.90002 | 0        | -2.80003 | 0        | -2.70001 | 0        | -2.60002 | 0        | -2.60002 | 0        |          |          |
| -2.80003052 | 0.06609996  | -2.70000763  | 0.069    | -2.600002 | 0.0359   | -2.5      | 0.0114   | -2.5      | 0.0137   | -2.80003 | 0        | -2.70001 | 0        | -2.60002 | 0        | -2.5     | 0        | -2.5     | 0        |          |          |
| -2.70000763 | 0.06870000  | -2.599998474 | 0.074    | -2.5      | 0.0367   | -2.399998 | 0.0043   | -2.399998 | 0.009    | -2.70001 | 0        | -2.60002 | 0        | -2.5     | 0        | -2.40002 | 0        | -2.40002 | 0        |          |          |
| -2.60002289 | 0.0698      | -2.5         | 0.0744   | -2.400002 | 0.0337   | -2.299999 | 0.0027   | -2.299999 | 0.0142   | -2.60002 | 0        | -2.5     | 0        | -2.40002 | 0        | -2.30003 | 0        | -2.30003 | 0        |          |          |
| -2.5        | 0.071       | -2.39997711  | 0.0764   | -2.299999 | 0.0323   | -2.199997 | 0.0089   | -2.199997 | 0.0223   | -2.5     | 0        | -2.40002 | 0        | -2.30003 | 0        | -2.20001 | 0        | -2.20001 | 0        |          |          |
| -2.40001526 | 0.0759      | -2.29999237  | 0.0801   | -2.200001 | 0.0387   | -2.099998 | 0.0152   | -2.099998 | 0.0291   | -2.40002 | 0        | -2.30003 | 0        | -2.20001 | 0        | -2.10002 | 0        | -2.10002 | 0        |          |          |
| -2.30003052 | 0.07969918  | -2.20000763  | 0.0833   | -2.100002 | 0.0407   | -2        | 0.0241   | -2        | 0.036    | -2.30003 | 0        | -2.20001 | 0        | -2.10002 | 0        | -2       | 0        | -2       | 0        |          |          |
| -2.20000763 | 0.08529999  | -2.099998474 | 0.0865   | -2        | 0.0484   | -1.899998 | 0.0263   | -1.899998 | 0.043    | -2.20001 | 0        | -2.10002 | 0        | -2       | 0        | -1.90002 | 0        | -1.90002 | 0        |          |          |
| -2.10002289 | 0.09500001  | -2           | 0.087    | -1.900002 | 0.061    | -1.799999 | 0.0274   | -1.799999 | 0.0423   | -2.10002 | 0        | -2       | 0        | -1.90002 | 0        | -1.80003 | 0        | -1.80003 | 0        |          |          |
| -2          | 0.09779998  | -1.89997711  | 0.0938   | -1.799999 | 0.0653   | -1.699997 | 0.0303   | -1.699997 | 0.0386   | -2       | 0        | -1.90002 | 0        | -1.80003 | 0        | -1.70001 | 0        | -1.70001 | 0        |          |          |
| -1.90001526 | 0.10529997  | -1.79999237  | 0.1022   | -1.700001 | 0.0625   | -1.599998 | 0.025    | -1.599998 | 0.0455   | -1.90002 | 0        | -1.80003 | 0        | -1.70001 | 0        | -1.60002 | 0        | -1.60002 | 0        |          |          |
| -1.80003052 | 0.114399849 | -1.70000763  | 0.1193   | -1.600002 | 0.0588   | -1.5      | 0.0127   | -1.5      | 0.0332   | -1.80003 | 0        | -1.70001 | 0        | -1.60002 | 0        | -1.5     | 0        | -1.5     | 0        |          |          |
| -1.70000763 | 0.12190003  | -1.599998474 | 0.1311   | -1.5      | 0.0443   | -1.399998 | 0.0174   | -1.399998 | 0.0282   | -1.70001 | 0        | -1.60002 | 0        | -1.5     | 0        | -1.40002 | 0        | -1.40002 | 0        |          |          |
| -1.60002289 | 0.13109999  | -1.5         | 0.1267   | -1.400002 | 0.0433   | -1.299999 | 0.0186   | -1.299999 | 0.0282   | -1.60002 | 0        | -1.5     | 0        | -1.40002 | 0        | -1.30003 | 0        | -1.30003 | 0        |          |          |
| -1.5        | 0.12330002  | -1.39997711  | 0.1299   | -1.299999 | 0.0433   | -1.199997 | 0.0186   | -1.199997 | 0.027    | -1.5     | 0        | -1.40002 | 0        | -1.30003 | 0        | -1.20001 | 0        | -1.20001 | 0        |          |          |
| -1.40001526 | 0.1298      | -1.29999237  | 0.1482   | -1.200001 | 0.0433   | -1.099998 | 0.0186   | -1.099998 | 0.0266   | -1.40002 | 0        | -1.30003 | 0        | -1.20001 | 0        | -1.10002 | 0        | -1.10002 | 0        |          |          |
| -1.30003052 | 0.1313      | -1.20000763  | 0.1396   | -1.100002 | 0.0443   | -1        | 0.0186   | -1        | 0.015    | -1.30003 | 0        | -1.20001 | 0        | -1.10002 | 0        | -1       | 0        | -1       | 0        |          |          |
| -1.20000763 | 0.1313      | -1.099998474 | 0.1299   | -1        | 0.0443   | -0.899998 | 0.0186   | -0.899998 | -0.0092  | -1.20001 | 0        | -1.10002 | 0        | -1       | 0        | -0.90002 | 0        | -0.90002 | 0        |          |          |
| -1.10002289 | 0.1298      | -1           | 0.1267   | -0.900002 | 0.0644   | -0.799999 | 0.0198   | -0.799999 | -0.0006  | -1.10002 | 0        | -1       | 0        | -0.90002 | 0        | -0.80003 | 0        | -0.80003 | 0        |          |          |
| -1          | 0.12330002  | -0.89997711  | 0.1091   | -0.799999 | 0.0641   | -0.699997 | 0.0223   | -0.699997 | 0.007999 | -1       | 0        | -0.90002 | 0        | -0.80003 | 0        | -0.70001 | 0        | -0.70001 | 0        |          |          |
| -0.90001526 | 0.12260002  | -0.79999237  | 0.1091   | -0.700001 | 0.0636   | -0.599998 | 0.0246   | -0.599998 | 0.015    | -0.90002 | 0        | -0.80003 | 0        | -0.70001 | 0        | -0.60002 | 0        | -0.60002 | 0        |          |          |
| -0.80003052 | 0.12260002  | -0.70000763  | 0.1091   | -0.600002 | 0.0505   | -0.5      | 0.0246   | -0.5      | 0.0266   | -0.80003 | 0        | -0.70001 | 0        | -0.60002 | 0        | -0.5     | 0        | -0.5     | 0        |          |          |
| -0.70000763 | 0.12260002  | -0.599998474 | 0.1091   | -0.5      | 0.0636   | -0.399998 | 0.0283   | -0.399998 | 0.027    | -0.70001 | 0        | -0.60002 | 0        | -0.5     | 0        | -0.40002 | 0        | -0.40002 | 0        |          |          |
| -0.60002289 | 0.12260002  | -0.5         | 0.1091   | -0.400002 | 0.0641   | -0.299999 | 0.0297   | -0.299999 | 0.0282   | -0.60002 | 0        | -0.5     | 0        | -0.40002 | 0        | -0.30003 | 0        | -0.30003 | 0        |          |          |
| -0.5        | 0.12330002  | -0.39997711  | 0.1091   | -0.299999 | 0.0644   | -0.199997 | 0.0337   | -0.199997 | 0.0282   | -0.5     | 0        | -0.40002 | 0        | -0.30003 | 0        | -0.20001 | 0        | -0.20001 | 0        |          |          |
| -0.40001526 | 0.1273      | -0.29999237  | 0.1267   | -0.200001 | 0.0683   | -0.099998 | 0.0341   | -0.099998 | 0.0315   | -0.40002 | 0        | -0.30003 | 0        | -0.20001 | 0        | -0.10002 | 0        | -0.10002 | 0        |          |          |
| -0.30003052 | 0.1298      | -0.20000763  | 0.1299   | -0.100002 | 0.0701   | 0         | 0.0364   | 0         | 0.0332   | -0.30003 | 0        | -0.20001 | 0        | -0.10002 | 0        | 0        | 0        | 0        | 0        |          |          |
| -0.20000763 | 0.1313      | -0.099998474 | 0.1396   | 0         | 0.0727   | 0.10002   | 0.055599 | 0.10002   | 0.035698 | -0.20001 | 0        | -0.10002 | 0        | 0        | 0        | 0.099998 | 24.51    | 0.099998 | 44.43    |          |          |
| -0.10002289 | 0.132700002 | 0            | 0.1482   | 0.099998  | 0.0746   | 0.20001   | 0.084998 | 0.20001   | 0.125442 | -0.10002 | 0        | 0        | 0        | 0.099998 | 7.893    | 0.199997 | 15.5669  | 0.299999 | 24.60217 | 0.199997 | 44.61437 |
| 0           | 0.1328      | 0.10002289   | 0.1487   | 0.20001   | 0.0747   | 0.30003   | 0.249306 | 0.30003   | 0.279737 | 0        | 0        | 0.099998 | 7.893    | 0.199997 | 15.5669  | 0.299999 | 24.69422 | 0.299999 | 44.79853 | 0.299999 | 44.79853 |
| 0.099998474 | 0.13340003  | 0.10002289   | 0.1512   | 0.299999  | 0.0747   | 0.400002  | 0.264189 | 0.400002  | 0.277234 | 0.099998 | 4.321    | 0.199997 | 7.916045 | 0.299999 | 15.60211 | 0.399998 | 24.78612 | 0.399998 | 44.78612 | 0.399998 | 44.78612 |
| 0.199996948 | 0.13360001  | 0.29999237   | 5.282065 | 0.399998  | 6.530829 | 0.5       | 19.46801 | 0.5       | 28.93383 | 0.199997 | 4.332506 | 0.299999 | 7.93906  | 0.399998 | 15.64807 | 0.5      | 24.87789 | 0.5      | 45.16618 | 0.399998 | 45.16618 |
| 0.29999237  | 0.136026444 | 0.40001526   | 5.787715 | 0.5       | 11.33858 | 0.600002  | 22.29793 | 0.600002  | 33.27675 | 0.299999 | 4.343999 | 0.399998 | 7.962044 | 0.5      | 15.69397 | 0.5      | 24.96953 | 0.5      | 45.34967 | 0.399998 | 45.34967 |
| 0.399997711 | 0.134014816 | 0.5          | 8.532541 | 0.599998  | 11.41587 | 0.700001  | 25.59223 | 0.700001  | 36.48404 | 0.399998 | 4.35548  | 0.5      | 9.984999 | 0.599998 | 15.7398  | 0.699997 | 25.06103 | 0.699997 | 45.53294 | 0.399998 | 45.53294 |
| 0.5         | 3.42914495  | 0.60002289   | 8.598787 | 0.700001  | 11.70258 | 0.800003  | 22.85464 | 0.800003  | 33.52852 | 0.5      | 4.366949 | 0.599998 | 8.007922 | 0.699997 | 17.58557 | 25.1524  | 0.799999 | 45.71598 | 0.399998 | 45.71598 |          |
| 0.599998474 | 3.445849775 | 0.70000763   | 6.062369 | 0.799999  | 11.95429 | 0.900002  | 24.94233 | 0.900002  | 41.17753 | 0.599998 | 4.378405 | 0.699997 | 8.030815 | 0.799999 | 15.83127 | 0.899998 | 25.24363 | 0.899998 | 45.8988  | 0.399998 | 45.8988  |
| 0.699996948 | 3.445849775 | 0.79999237   | 6.111809 | 0.899998  | 12.18903 | 1         | 23.09785 | 1         | 42.81351 | 0.699997 | 4.389848 | 0.799999 | 8.053678 | 0.899998 | 15.8769  | 1        | 25.33472 | 1        | 46.0814  | 0.399998 | 46.0814  |
| 0.79999237  | 3.445849775 | 0.90001526   | 6.142207 | 1         | 12.34625 | 1.100002  | 23.31548 | 1.100002  | 43.74649 | 0.799999 | 4.40128  | 0.899998 | 8.07651  | 1        | 15.92248 | 1.099998 | 25.42568 | 1.099998 | 46.26376 | 0.399998 | 46.26376 |
| 0.899997711 | 3.445849775 | 1            | 6.152409 | 1.099998  | 12.40557 | 1.200001  | 23.5547  | 1.200001  | 43.79145 | 0.899998 | 4.412669 | 1        | 8.099312 | 1.       |          |          |          |          |          |          |          |

|             |             |              |          |          |          |          |          |          |          |          |          |          |          |          |          |          |          |          |          |
|-------------|-------------|--------------|----------|----------|----------|----------|----------|----------|----------|----------|----------|----------|----------|----------|----------|----------|----------|----------|----------|
| 6.89997711  | 4.774389223 | 7            | 9.144874 | 7.099998 | 18.34888 | 7.200001 | 31.81168 | 7.200001 | 58.91797 | 6.899998 | 5.075636 | 7        | 9.412627 | 7.099998 | 18.58058 | 7.199997 | 30.7095  | 7.199997 | 56.92562 |
| 7           | 4.771839076 | 7.100002289  | 9.200112 | 7.200001 | 18.41564 | 7.300003 | 31.90913 | 7.300003 | 59.07894 | 7        | 5.086321 | 7.099998 | 9.433616 | 7.199997 | 18.62216 | 7.299999 | 30.79166 | 7.299999 | 57.09224 |
| 7.099998474 | 4.798841414 | 7.200000763  | 9.237009 | 7.299999 | 18.48166 | 7.400002 | 31.99531 | 7.400002 | 59.23419 | 7.099998 | 5.069694 | 7.199997 | 9.454575 | 7.299999 | 18.66368 | 7.399998 | 30.87368 | 7.399998 | 57.25857 |
| 7.199996948 | 4.807992829 | 7.299999237  | 9.268458 | 7.399998 | 18.55606 | 7.5      | 32.08946 | 7.5      | 59.40505 | 7.199997 | 5.107656 | 7.299999 | 9.475506 | 7.399998 | 18.70513 | 7.5      | 30.95555 | 7.5      | 57.42462 |
| 7.299999237 | 4.815520326 | 7.400001526  | 9.298046 | 7.5      | 18.62502 | 7.600002 | 32.17337 | 7.600002 | 59.58473 | 7.299999 | 5.118306 | 7.399998 | 9.496407 | 7.5      | 18.74653 | 7.599998 | 31.03727 | 7.599998 | 57.59038 |
| 7.399997711 | 4.826685435 | 7.5          | 9.341687 | 7.599998 | 18.68597 | 7.700001 | 32.25514 | 7.700001 | 59.74165 | 7.399998 | 5.128944 | 7.5      | 9.517281 | 7.599998 | 18.82785 | 7.699997 | 31.11884 | 7.699997 | 57.75585 |
| 7.5         | 4.8485099   | 7.600002289  | 9.377358 | 7.700001 | 18.74178 | 7.800003 | 32.33448 | 7.800003 | 59.91515 | 7.5      | 5.139571 | 7.599998 | 9.538124 | 7.699997 | 18.82911 | 7.799999 | 31.07227 | 7.799999 | 57.92104 |
| 7.599998474 | 4.862442328 | 7.700000763  | 9.395657 | 7.799999 | 18.80571 | 7.900002 | 32.42958 | 7.900002 | 60.08441 | 7.599998 | 5.150185 | 7.699997 | 9.558938 | 7.799999 | 18.87031 | 7.899998 | 31.28154 | 7.899998 | 58.08594 |
| 7.699996948 | 4.873129667 | 7.799999237  | 9.427879 | 7.899998 | 18.866   | 8        | 32.50563 | 8        | 60.23564 | 7.699997 | 5.160788 | 7.799999 | 9.579725 | 7.899998 | 18.91145 | 8        | 31.36267 | 8        | 58.25055 |
| 7.799999237 | 4.887074852 | 7.900001526  | 9.45659  | 8        | 18.92196 | 8.100002 | 32.58251 | 8.100002 | 60.37664 | 7.799999 | 5.17138  | 7.899998 | 9.600481 | 8        | 18.95252 | 8.099998 | 31.44365 | 8.099998 | 58.41487 |
| 7.899997711 | 4.911214595 | 8            | 9.482147 | 8.099998 | 18.97605 | 8.200001 | 32.67473 | 8.200001 | 60.54714 | 7.899998 | 5.18196  | 8        | 9.62121  | 8.099998 | 18.99352 | 8.199997 | 31.52448 | 8.199997 | 58.57889 |
| 8           | 4.925896015 | 8.100002289  | 9.496151 | 8.200001 | 19.03625 | 8.300003 | 32.76125 | 8.300003 | 60.69578 | 8        | 5.192528 | 8.099998 | 9.641909 | 8.199997 | 19.03446 | 8.299999 | 31.60516 | 8.299999 | 58.74263 |
| 8.099998474 | 4.938501191 | 8.200000763  | 9.531669 | 8.299999 | 19.09452 | 8.400002 | 32.84533 | 8.400002 | 60.84556 | 8.099998 | 5.203085 | 8.199997 | 9.662579 | 8.299999 | 19.07534 | 8.399998 | 31.68569 | 8.399998 | 58.90607 |
| 8.199996948 | 4.961570814 | 8.299999237  | 9.558623 | 8.399998 | 19.16087 | 8.5      | 32.93212 | 8.5      | 61.00031 | 8.199997 | 5.213629 | 8.299999 | 9.683221 | 8.399998 | 19.11616 | 8.5      | 31.76608 | 8.5      | 59.06922 |
| 8.299999237 | 4.97008289  | 8.400001526  | 9.57482  | 8.5      | 19.21921 | 8.600002 | 33.01871 | 8.600002 | 61.15148 | 8.299999 | 5.224163 | 8.399998 | 9.703834 | 8.5      | 19.15691 | 8.599998 | 31.84631 | 8.599998 | 59.23207 |
| 8.399997711 | 4.98171379  | 8.5          | 9.59385  | 8.599998 | 19.28254 | 8.700001 | 33.10156 | 8.700001 | 61.31003 | 8.399998 | 5.234685 | 8.5      | 9.724418 | 8.599998 | 19.1976  | 8.699997 | 31.9264  | 8.699997 | 59.39462 |
| 8.5         | 4.989526779 | 8.600002289  | 9.613645 | 8.700001 | 19.35007 | 8.800003 | 33.18275 | 8.800003 | 61.45781 | 8.5      | 5.245195 | 8.599998 | 9.744793 | 8.699997 | 19.23822 | 8.799999 | 32.00633 | 8.799999 | 59.55689 |
| 8.599998474 | 4.999577156 | 8.700000763  | 9.640828 | 8.799999 | 19.40396 | 8.900002 | 33.26128 | 8.900002 | 61.59982 | 8.599998 | 5.255693 | 8.699997 | 9.765499 | 8.799999 | 19.27878 | 8.899998 | 32.08612 | 8.899998 | 59.71884 |
| 8.699996948 | 5.001443074 | 8.799999237  | 9.666901 | 8.899998 | 19.45541 | 9        | 33.32809 | 9        | 61.74039 | 8.699997 | 5.266618 | 8.799999 | 9.785998 | 8.899998 | 19.31927 | 9        | 32.16576 | 9        | 59.88051 |
| 8.799999237 | 5.028581617 | 8.900001526  | 9.688656 | 9        | 19.5103  | 9.100002 | 33.40536 | 9.100002 | 61.86775 | 8.799999 | 5.276656 | 8.899998 | 9.806467 | 9        | 19.35971 | 9.099998 | 32.24524 | 9.099998 | 60.04187 |
| 8.899997711 | 5.04604498  | 9            | 9.731016 | 9.099998 | 19.5575  | 9.200001 | 33.47966 | 9.200001 | 62.01375 | 8.899998 | 5.28712  | 9        | 9.826098 | 9.099998 | 19.40007 | 9.199997 | 32.32457 | 9.199997 | 60.20292 |
| 9           | 5.06016396  | 9.100002289  | 9.739528 | 9.200001 | 19.60988 | 9.300003 | 33.5544  | 9.300003 | 62.15648 | 9        | 5.297572 | 9.099998 | 9.847319 | 9.199997 | 19.44038 | 9.299999 | 32.40376 | 9.299999 | 60.36368 |
| 9.099998474 | 5.076572136 | 9.200000763  | 9.764789 | 9.299999 | 19.65926 | 9.400002 | 33.62339 | 9.400002 | 62.29181 | 9.099998 | 5.308013 | 9.199997 | 9.867703 | 9.299999 | 19.48062 | 9.399998 | 32.4828  | 9.399998 | 60.52413 |
| 9.199996948 | 5.087812936 | 9.299999237  | 9.789158 | 9.399998 | 19.71339 | 9.5      | 33.69553 | 9.5      | 62.43035 | 9.199997 | 5.318442 | 9.299999 | 9.888058 | 9.399998 | 19.52079 | 9.5      | 32.56168 | 9.5      | 60.68428 |
| 9.299999237 | 5.097698278 | 9.400001526  | 9.81623  | 9.5      | 19.75669 | 9.600002 | 33.76459 | 9.600002 | 62.57496 | 9.299999 | 5.32886  | 9.399998 | 9.908384 | 9.5      | 19.56091 | 9.599998 | 32.64041 | 9.599998 | 60.84412 |
| 9.399997711 | 5.115969958 | 9.5          | 9.846072 | 9.599998 | 19.8105  | 9.700001 | 33.84074 | 9.700001 | 62.71661 | 9.399998 | 5.339267 | 9.5      | 9.928682 | 9.599998 | 19.60096 | 9.699997 | 32.71899 | 9.699997 | 61.00365 |
| 9.5         | 5.127116112 | 9.600002289  | 9.86756  | 9.700001 | 19.86424 | 9.800003 | 33.91141 | 9.800003 | 62.84676 | 9.5      | 5.349662 | 9.599998 | 9.948591 | 9.699997 | 19.64094 | 9.799999 | 32.79743 | 9.799999 | 61.16289 |
| 9.599998474 | 5.13862141  | 9.700000763  | 9.893227 | 9.799999 | 19.91298 | 9.900002 | 33.98513 | 9.900002 | 62.97704 | 9.599998 | 5.360045 | 9.699997 | 9.969191 | 9.799999 | 19.68086 | 9.899998 | 32.87571 | 9.899998 | 61.3218  |
| 9.699996948 | 5.153595511 | 9.799999237  | 9.914925 | 9.899998 | 19.96824 | 10       | 34.05967 | 10       | 63.11153 | 9.699997 | 5.370417 | 9.799999 | 9.989404 | 9.899998 | 19.7202  | 10       | 32.95384 | 10       | 61.48042 |
| 9.799999237 | 5.164244227 | 9.900001526  | 9.940536 | 10       | 20.02086 | 10.1     | 34.12961 | 10.1     | 63.24483 | 9.799999 | 5.380777 | 9.899998 | 10.00959 | 10       | 19.76052 | 10.1     | 33.03181 | 10.1     | 61.63871 |
| 9.899997711 | 5.174489303 | 10           | 9.96559  | 10.1     | 20.06798 | 10.2     | 34.19383 | 10.2     | 63.37452 | 9.899998 | 5.391126 | 10       | 10.02974 | 10.1     | 19.80025 | 10.2     | 33.10964 | 10.2     | 61.7967  |
| 10          | 5.186012635 | 10.100002289 | 9.984183 | 10.2     | 20.12331 | 10.3     | 34.27063 | 10.3     | 63.51547 | 10       | 5.401464 | 10.1     | 10.04987 | 10.2     | 19.83991 | 10.3     | 33.18731 | 10.3     | 61.95437 |
| 10.09999847 | 5.197818783 | 10.200000763 | 10.01235 | 10.3     | 20.18238 | 10.4     | 34.34501 | 10.4     | 63.65849 | 10.1     | 5.41179  | 10.2     | 10.06997 | 10.3     | 19.87952 | 10.4     | 33.26483 | 10.4     | 62.11173 |
| 10.19999695 | 5.210199294 | 10.299999237 | 10.03987 | 10.4     | 20.23215 | 10.5     | 34.41123 | 10.5     | 63.78783 | 10.2     | 5.422104 | 10.3     | 10.09004 | 10.4     | 19.91906 | 10.5     | 33.34221 | 10.5     | 62.26878 |
| 10.29999924 | 5.224653357 | 10.400001526 | 10.06083 | 10.5     | 20.27175 | 10.6     | 34.48289 | 10.6     | 63.91845 | 10.3     | 5.432408 | 10.4     | 10.11008 | 10.5     | 19.95853 | 10.6     | 33.41942 | 10.6     | 62.42551 |
| 10.39999771 | 5.23257679  | 10.5         | 10.08241 | 10.6     | 20.31546 | 10.7     | 34.55103 | 10.7     | 64.04736 | 10.4     | 5.4427   | 10.5     | 10.13009 | 10.6     | 19.99795 | 10.7     | 33.49649 | 10.7     | 62.58192 |
| 10.5        | 5.243157158 | 10.600002289 | 10.10436 | 10.7     | 20.36462 | 10.8     | 34.62727 | 10.8     | 64.18645 | 10.5     | 5.45298  | 10.6     | 10.15008 | 10.7     | 20.03729 | 10.8     | 33.5734  | 10.8     | 62.73802 |
| 10.59999847 | 5.253074095 | 10.700000763 | 10.12426 | 10.8     | 20.41979 | 10.9     | 34.69975 | 10.9     | 64.31931 | 10.6     | 5.463249 | 10.7     | 10.17004 | 10.8     | 20.07658 | 10.9     | 33.65016 | 10.9     | 62.89379 |
| 10.69999695 | 5.265667715 | 10.799999237 | 10.15262 | 10.9     | 20.46977 | 11       | 34.77174 | 11       | 64.4518  | 10.7     | 5.473507 | 10.8     | 10.18997 | 10.9     | 20.1158  | 11       | 33.72677 | 11       | 63.04925 |
| 10.79999924 | 5.287139851 | 10.900001526 | 10.175   | 11       | 20.52623 | 11.1     | 34.84606 | 11.1     | 64.57547 | 10.8     | 5.483753 | 10.9     | 10.20987 | 11       | 20.15496 | 11.1     | 33.80322 | 11.1     | 63.20438 |
| 10.89999771 | 5.302615935 | 11           | 10.2025  | 11.1     | 20.58332 | 11.2     | 34.91245 | 11.2     | 64.70151 | 10.9     | 5.493988 | 11       | 10.22974 | 11.1     | 20.19406 | 11.2     | 33.87952 | 11.2     | 63.35919 |
| 11          | 5.317128595 | 11.100002289 | 10.22971 | 11.2     | 20.63028 | 11.3     | 34.9829  | 11.3     | 64.83004 | 11       | 5.504212 | 11.1     | 10.24958 | 11.2     | 20.23309 | 11.3     | 33.95567 | 11.3     | 63.51368 |
| 11.09999847 | 5.33585925  | 11.200000763 | 10.25349 | 11.3     | 20.67896 | 11.4     | 35.05589 | 11.4     | 64.9576  | 11.1     | 5.514424 | 11.2     | 10.2694  | 11.3     | 20.27206 | 11.4     | 34.03167 | 11.4     | 63.66785 |
| 11.19999695 | 5.349004646 | 11.299999237 | 10.27871 | 11.4     | 20.73378 | 11.5     | 35.12589 | 11.5     | 65.08251 | 11.2     | 5.524625 | 11.3     | 10.28919 | 11.4     | 20.31096 | 11.5     | 34.10751 | 11.5     | 63.82169 |
| 11.29999924 | 5.366832971 | 11.400001526 | 10.30448 | 11.5     | 20.78483 | 11.6     | 35.19458 | 11.6     | 65.20591 | 11.3     | 5.534815 | 11.4     | 10.30895 | 11.5     | 20.34981 | 11.6     | 34.1832  | 11.6     | 63.9752  |
| 11.39999771 | 5.3806982   | 11.5         | 10.32581 | 11.6     | 20.83386 | 11.7     | 35.26128 | 11.7     | 65.32562 | 11.4     | 5.544993 | 11.5     | 10.32868 | 11.6     | 20.38859 | 11.7     | 34.25873 | 11.7     | 64.12838 |
| 11.5        | 5.393878505 | 11.600002289 | 10.35089 | 11.7     | 20.88587 | 11.8     | 35.33051 | 11.8     | 65.45094 | 11.5     | 5.555161 | 11.6     | 10.34838 | 11.7     | 20.4273  | 11.8     | 34.33412 | 11.8     | 64.28124 |
| 11.59999847 | 5.404586976 | 11.700000763 | 10.37419 | 11.8     | 20.93658 | 11.9     | 35.40212 | 11.9     | 65.58412 | 11.6     | 5.565316 | 11.7     | 10.36806 | 11.8     | 20.46595 | 11.9     | 34.40934 | 11.9     | 64.43377 |
| 11.69999695 | 5.415491401 | 11.799999237 | 10.39602 | 11.9     | 20.98981 | 12       | 35.46814 | 12       | 65.71363 | 11.7     | 5.575461 | 11.8     | 10.38771 | 11.9     | 20.50454 | 12       | 34.48442 | 12       | 64.58597 |
| 11.79999924 | 5.428390823 | 11.900001526 | 10.42    |          |          |          |          |          |          |          |          |          |          |          |          |          |          |          |          |

|             |             |             |          |      |          |      |          |      |          |      |          |      |          |      |          |      |          |      |          |
|-------------|-------------|-------------|----------|------|----------|------|----------|------|----------|------|----------|------|----------|------|----------|------|----------|------|----------|
| 18.39999771 | 6.234136022 | 18.5        | 11.841   | 18.6 | 23.76851 | 18.7 | 39.57271 | 18.7 | 73.13651 | 18.4 | 6.229975 | 18.5 | 11.64156 | 18.6 | 22.94733 | 18.7 | 39.15825 | 18.7 | 73.97561 |
| 18.5        | 6.245921093 | 18.60000229 | 11.86511 | 18.7 | 23.80393 | 18.8 | 39.62537 | 18.8 | 73.23866 | 18.5 | 6.239736 | 18.6 | 11.65935 | 18.7 | 22.98168 | 18.8 | 39.22263 | 18.8 | 74.10291 |
| 18.59999847 | 6.263878183 | 18.70000076 | 11.89158 | 18.8 | 23.83877 | 18.9 | 39.68275 | 18.9 | 73.34417 | 18.6 | 6.248766 | 18.7 | 11.67713 | 18.8 | 23.01597 | 18.9 | 39.28685 | 18.9 | 74.2298  |
| 18.69999695 | 6.281109319 | 18.79999924 | 11.91148 | 18.9 | 23.87251 | 19   | 39.73963 | 19   | 73.44448 | 18.7 | 6.258146 | 18.8 | 11.69487 | 18.9 | 23.0502  | 19   | 39.35092 | 19   | 74.3563  |
| 18.79999924 | 6.289819417 | 18.90000153 | 11.92929 | 19   | 23.91069 | 19.1 | 39.79227 | 19.1 | 73.54279 | 18.8 | 6.267515 | 18.9 | 11.71259 | 19   | 23.08437 | 19.1 | 39.41482 | 19.1 | 74.4824  |
| 18.89999771 | 6.304359211 | 19          | 11.94932 | 19.1 | 23.94779 | 19.2 | 39.84624 | 19.2 | 73.64427 | 18.9 | 6.276873 | 19   | 11.73029 | 19.1 | 23.11848 | 19.2 | 39.47856 | 19.2 | 74.60809 |
| 19          | 6.313272417 | 19.10000229 | 11.96655 | 19.2 | 23.98547 | 19.3 | 39.89637 | 19.3 | 73.7495  | 19   | 6.286221 | 19.1 | 11.74796 | 19.2 | 23.15253 | 19.3 | 39.54215 | 19.3 | 74.73338 |
| 19.09999847 | 6.322917848 | 19.20000076 | 11.9859  | 19.3 | 24.02129 | 19.4 | 39.94758 | 19.4 | 73.85746 | 19.1 | 6.295558 | 19.2 | 11.7656  | 19.3 | 23.18651 | 19.4 | 39.60558 | 19.4 | 74.85826 |
| 19.19999695 | 6.33645041  | 19.29999924 | 12.00456 | 19.4 | 24.05541 | 19.5 | 40.00048 | 19.5 | 73.95478 | 19.2 | 6.304885 | 19.3 | 11.78321 | 19.4 | 23.22044 | 19.5 | 39.66884 | 19.5 | 74.98275 |
| 19.29999924 | 6.346732287 | 19.40000153 | 12.02367 | 19.5 | 24.09507 | 19.6 | 40.05934 | 19.6 | 74.05035 | 19.3 | 6.314201 | 19.4 | 11.8008  | 19.5 | 23.2543  | 19.6 | 39.73195 | 19.6 | 75.10682 |
| 19.39999771 | 6.359815158 | 19.5        | 12.04326 | 19.6 | 24.13287 | 19.7 | 40.11428 | 19.7 | 74.14744 | 19.4 | 6.323507 | 19.5 | 11.81837 | 19.6 | 23.28811 | 19.7 | 39.79489 | 19.7 | 75.23049 |
| 19.5        | 6.373385117 | 19.60000229 | 12.06073 | 19.7 | 24.16801 | 19.8 | 40.16813 | 19.8 | 74.24776 | 19.5 | 6.332802 | 19.6 | 11.8359  | 19.7 | 23.32185 | 19.8 | 39.85768 | 19.8 | 75.35375 |
| 19.59999847 | 6.383856367 | 19.70000076 | 12.08108 | 19.8 | 24.20047 | 19.9 | 40.22354 | 19.9 | 74.34283 | 19.6 | 6.342087 | 19.7 | 11.85341 | 19.8 | 23.35553 | 19.9 | 39.92031 | 19.9 | 75.4766  |
| 19.69999695 | 6.400443547 | 19.79999924 | 12.10056 | 19.9 | 24.23083 | 20   | 40.27288 | 20   | 74.43603 | 19.7 | 6.351361 | 19.8 | 11.8709  | 19.9 | 23.38915 | 20   | 39.98278 | 20   | 75.59904 |
| 19.79999924 | 6.413793265 | 19.90000153 | 12.11594 | 20   | 24.26048 | 20.1 | 40.32796 | 20.1 | 74.53695 | 19.8 | 6.360625 | 19.9 | 11.88836 | 20   | 23.42271 | 20.1 | 40.04509 | 20.1 | 75.72107 |
| 19.89999771 | 6.424268947 | 20          | 12.13035 | 20.1 | 24.29119 | 20.2 | 40.38207 | 20.2 | 74.63542 | 19.9 | 6.369878 | 20   | 11.90579 | 20.1 | 23.45621 | 20.2 | 40.10723 | 20.2 | 75.84269 |
| 20          | 6.436412209 | 20.10000229 | 12.15302 | 20.2 | 24.32226 | 20.3 | 40.44169 | 20.3 | 74.73576 | 20   | 6.37912  | 20.1 | 11.9232  | 20.2 | 23.48965 | 20.3 | 40.16922 | 20.3 | 75.9639  |
| 20.09999847 | 6.449325191 | 20.20000076 | 12.17334 | 20.3 | 24.35961 | 20.4 | 40.49359 | 20.4 | 74.83066 | 20.1 | 6.388352 | 20.2 | 11.94058 | 20.3 | 23.52303 | 20.4 | 40.23105 | 20.4 | 76.0847  |
| 20.19999695 | 6.463542675 | 20.29999924 | 12.19207 | 20.4 | 24.38791 | 20.5 | 40.54721 | 20.5 | 74.92561 | 20.2 | 6.397574 | 20.3 | 11.95793 | 20.4 | 23.55635 | 20.5 | 40.29272 | 20.5 | 76.20508 |
| 20.29999924 | 6.480249183 | 20.40000153 | 12.20492 | 20.5 | 24.41987 | 20.6 | 40.59824 | 20.6 | 75.01932 | 20.3 | 6.406786 | 20.4 | 11.97526 | 20.5 | 23.58961 | 20.6 | 40.35423 | 20.6 | 76.32505 |
| 20.39999771 | 6.492265733 | 20.5        | 12.2222  | 20.6 | 24.45091 | 20.7 | 40.65092 | 20.7 | 75.10859 | 20.4 | 6.415986 | 20.5 | 11.99257 | 20.6 | 23.6228  | 20.7 | 40.41588 | 20.7 | 76.4446  |
| 20.5        | 6.503847782 | 20.60000229 | 12.23885 | 20.7 | 24.4822  | 20.8 | 40.70312 | 20.8 | 75.20607 | 20.5 | 6.425177 | 20.6 | 12.00984 | 20.7 | 23.65594 | 20.8 | 40.47677 | 20.8 | 76.56374 |
| 20.59999847 | 6.515725721 | 20.70000076 | 12.25596 | 20.8 | 24.51762 | 20.9 | 40.76106 | 20.9 | 75.30402 | 20.6 | 6.434357 | 20.7 | 12.02709 | 20.8 | 23.68902 | 20.9 | 40.5378  | 20.9 | 76.68246 |
| 20.69999695 | 6.526603611 | 20.79999924 | 12.27569 | 20.9 | 24.55346 | 21   | 40.81772 | 21   | 75.39867 | 20.7 | 6.443526 | 20.8 | 12.04432 | 20.9 | 23.72203 | 21   | 40.59868 | 21   | 76.80077 |
| 20.79999924 | 6.543414131 | 20.90000153 | 12.29753 | 21   | 24.59214 | 21.1 | 40.87007 | 21.1 | 75.49248 | 20.8 | 6.452686 | 20.9 | 12.06152 | 21   | 23.75499 | 21.1 | 40.65939 | 21.1 | 76.91865 |
| 20.89999771 | 6.560363996 | 21          | 12.32009 | 21.1 | 24.62738 | 21.2 | 40.91984 | 21.2 | 75.58655 | 20.9 | 6.461835 | 21   | 12.07669 | 21.1 | 23.78788 | 21.2 | 40.71994 | 21.2 | 77.03612 |
| 21          | 6.577561987 | 21.10000229 | 12.34128 | 21.2 | 24.65646 | 21.3 | 40.96804 | 21.3 | 75.68256 | 21   | 6.470973 | 21.1 | 12.09584 | 21.2 | 23.82072 | 21.3 | 40.78033 | 21.3 | 77.15317 |
| 21.09999847 | 6.591718282 | 21.20000076 | 12.35746 | 21.3 | 24.69079 | 21.4 | 41.01655 | 21.4 | 75.77739 | 21.1 | 6.480101 | 21.2 | 12.11296 | 21.3 | 23.85349 | 21.4 | 40.84064 | 21.4 | 77.2698  |
| 21.19999695 | 6.605304683 | 21.29999924 | 12.37919 | 21.4 | 24.71832 | 21.5 | 41.06511 | 21.5 | 75.86966 | 21.2 | 6.489219 | 21.3 | 12.13006 | 21.4 | 23.88621 | 21.5 | 40.90064 | 21.5 | 77.38601 |
| 21.29999924 | 6.620398422 | 21.40000153 | 12.40075 | 21.5 | 24.74593 | 21.6 | 41.11414 | 21.6 | 75.96047 | 21.3 | 6.498327 | 21.4 | 12.14713 | 21.5 | 23.91886 | 21.6 | 40.96055 | 21.6 | 77.50179 |
| 21.39999771 | 6.635517081 | 21.5        | 12.42169 | 21.6 | 24.77118 | 21.7 | 41.16294 | 21.7 | 76.04964 | 21.4 | 6.507423 | 21.5 | 12.16418 | 21.6 | 23.95146 | 21.7 | 41.0203  | 21.7 | 77.61716 |
| 21.5        | 6.650981893 | 21.60000229 | 12.43671 | 21.7 | 24.7988  | 21.8 | 41.21252 | 21.8 | 76.13521 | 21.5 | 6.51651  | 21.6 | 12.1812  | 21.7 | 23.98399 | 21.8 | 41.0799  | 21.8 | 77.7321  |
| 21.59999847 | 6.665514456 | 21.70000076 | 12.45322 | 21.8 | 24.82419 | 21.9 | 41.27003 | 21.9 | 76.22565 | 21.6 | 6.525587 | 21.7 | 12.19819 | 21.8 | 24.01646 | 21.9 | 41.13933 | 21.9 | 77.84662 |
| 21.69999695 | 6.672061395 | 21.79999924 | 12.47052 | 21.9 | 24.85715 | 22   | 41.32092 | 22   | 76.32108 | 21.7 | 6.534653 | 21.8 | 12.21516 | 21.9 | 24.04888 | 22   | 41.19861 | 22   | 77.96071 |
| 21.79999924 | 6.679980029 | 21.90000153 | 12.49538 | 22   | 24.88632 | 22.1 | 41.36671 | 22.1 | 76.40993 | 21.8 | 6.543709 | 21.9 | 12.2321  | 22   | 24.08123 | 22.1 | 41.25772 | 22.1 | 78.07438 |
| 21.89999771 | 6.691214955 | 22          | 12.51775 | 22.1 | 24.90857 | 22.2 | 41.41937 | 22.2 | 76.49917 | 21.9 | 6.552754 | 22   | 12.24902 | 22.1 | 24.11353 | 22.2 | 41.31668 | 22.2 | 78.18762 |
| 22          | 6.70621391  | 22.10000229 | 12.5294  | 22.2 | 24.93085 | 22.3 | 41.47769 | 22.3 | 76.59864 | 22   | 6.561789 | 22.1 | 12.26591 | 22.2 | 24.14576 | 22.3 | 41.37548 | 22.3 | 78.30044 |
| 22.09999847 | 6.715010364 | 22.20000076 | 12.54645 | 22.3 | 24.96545 | 22.4 | 41.5282  | 22.4 | 76.69319 | 22.1 | 6.570814 | 22.2 | 12.28278 | 22.3 | 24.17794 | 22.4 | 41.43411 | 22.4 | 78.41283 |
| 22.19999695 | 6.723557216 | 22.29999924 | 12.56999 | 22.4 | 24.99893 | 22.5 | 41.57126 | 22.5 | 76.78913 | 22.2 | 6.579829 | 22.3 | 12.29962 | 22.4 | 24.21005 | 22.5 | 41.49259 | 22.5 | 78.52448 |
| 22.29999924 | 6.738165889 | 22.40000153 | 12.58985 | 22.5 | 25.02551 | 22.6 | 41.61915 | 22.6 | 76.88847 | 22.3 | 6.588834 | 22.4 | 12.31644 | 22.5 | 24.24211 | 22.6 | 41.55091 | 22.6 | 78.63633 |
| 22.39999771 | 6.749593217 | 22.5        | 12.60668 | 22.6 | 25.05726 | 22.7 | 41.66762 | 22.7 | 76.97856 | 22.4 | 6.597828 | 22.5 | 12.33323 | 22.6 | 24.2741  | 22.7 | 41.60907 | 22.7 | 78.74744 |
| 22.5        | 6.761550731 | 22.60000229 | 12.62719 | 22.7 | 25.08486 | 22.8 | 41.71695 | 22.8 | 77.06919 | 22.5 | 6.606812 | 22.6 | 12.34999 | 22.7 | 24.30604 | 22.8 | 41.66707 | 22.8 | 78.85812 |
| 22.59999847 | 6.773552275 | 22.70000076 | 12.64788 | 22.8 | 25.115   | 22.9 | 41.76121 | 22.9 | 77.15618 | 22.6 | 6.615785 | 22.7 | 12.36673 | 22.8 | 24.33791 | 22.9 | 41.72491 | 22.9 | 78.96836 |
| 22.69999695 | 6.785038825 | 22.79999924 | 12.66425 | 22.9 | 25.14072 | 23   | 41.80699 | 23   | 77.24363 | 22.7 | 6.624749 | 22.8 | 12.38345 | 22.9 | 24.36973 | 23   | 41.78259 | 23   | 79.07818 |
| 22.79999924 | 6.795957417 | 22.90000153 | 12.6785  | 23   | 25.16986 | 23.1 | 41.85904 | 23.1 | 77.33311 | 22.8 | 6.633702 | 22.9 | 12.40014 | 23   | 24.40149 | 23.1 | 41.84011 | 23.1 | 79.18757 |
| 22.89999771 | 6.79790425  | 23          | 12.69636 | 23.1 | 25.19509 | 23.2 | 41.90729 | 23.2 | 77.42291 | 22.9 | 6.642645 | 23   | 12.4168  | 23.1 | 24.43319 | 23.2 | 41.89747 | 23.2 | 79.29652 |
| 23          | 6.807268218 | 23.10000229 | 12.71349 | 23.2 | 25.22342 | 23.3 | 41.9517  | 23.3 | 77.51597 | 23   | 6.651578 | 23.1 | 12.43344 | 23.2 | 24.46483 | 23.3 | 41.95467 | 23.3 | 79.40505 |
| 23.09999847 | 6.814133039 | 23.20000076 | 12.73134 | 23.3 | 25.25368 | 23.4 | 42.00176 | 23.4 | 77.61661 | 23.1 | 6.660501 | 23.2 | 12.45005 | 23.3 | 24.49641 | 23.4 | 42.01172 | 23.4 | 79.51314 |
| 23.19999695 | 6.819330303 | 23.29999924 | 12.74557 | 23.4 | 25.2807  | 23.5 | 42.04853 | 23.5 | 77.71574 | 23.2 | 6.669413 | 23.3 | 12.46664 | 23.4 | 24.52792 | 23.5 | 42.0686  | 23.5 | 79.6208  |
| 23.29999924 | 6.827304975 | 23.40000153 | 12.7726  | 23.5 | 25.30607 | 23.6 | 42.0945  | 23.6 | 77.81461 | 23.3 | 6.678316 | 23.4 | 12.4832  | 23.5 | 24.55939 | 23.6 | 42.12533 | 23.6 | 79.72803 |
| 23.39999771 | 6.842113004 | 23.5        | 12.79435 | 23.6 | 25.33466 | 23.7 | 42.13962 | 23.7 | 77.90456 | 23.4 | 6.687208 | 23.5 | 12.49974 | 23.6 | 24.59079 | 23.7 | 42.18189 | 23.7 | 79.83482 |
| 23.5        | 6.853386511 | 23.60000229 | 12.81358 | 23.7 | 25.35977 | 23.8 | 42.19176 | 23.8 | 77.99639 | 23.5 | 6.696091 | 23.6 | 12.51625 | 23.7 | 24.62213 | 23.8 | 42.2383  | 23.8 | 79.94118 |
| 23.59999847 | 6.863077152 | 23.70000076 | 12.83079 |      |          |      |          |      |          |      |          |      |          |      |          |      |          |      |          |



|             |             |             |          |      |          |      |          |      |          |      |          |      |          |      |          |      |          |      |          |
|-------------|-------------|-------------|----------|------|----------|------|----------|------|----------|------|----------|------|----------|------|----------|------|----------|------|----------|
| 29.90000153 | 7.49220317  | 30.00000381 | 13.80982 | 30.1 | 27.0326  | 30.2 | 45.14172 | 30.2 | 83.34652 | 29.9 | 7.24388  | 30   | 13.52199 | 30.1 | 26.50719 | 30.2 | 45.52139 | 30.2 | 85.83407 |
| 30          | 7.49779637  | 30.10000229 | 13.82118 | 30.2 | 27.05318 | 30.3 | 45.18728 | 30.3 | 83.43058 | 30   | 7.252123 | 30.1 | 13.53693 | 30.2 | 26.53479 | 30.3 | 45.56766 | 30.3 | 85.91187 |
| 30.09999847 | 7.50321442  | 30.20000076 | 13.83463 | 30.3 | 27.07507 | 30.4 | 45.2345  | 30.4 | 83.51814 | 30.1 | 7.260356 | 30.2 | 13.55184 | 30.3 | 26.56234 | 30.4 | 45.61377 | 30.4 | 85.98924 |
| 30.19999695 | 7.513352961 | 30.29999924 | 13.84998 | 30.4 | 27.10102 | 30.5 | 45.27657 | 30.5 | 83.59842 | 30.2 | 7.26858  | 30.3 | 13.56672 | 30.4 | 26.58983 | 30.5 | 45.65973 | 30.5 | 86.06617 |
| 30.29999542 | 7.522529042 | 30.39999771 | 13.86714 | 30.5 | 27.12118 | 30.6 | 45.31851 | 30.6 | 83.67438 | 30.3 | 7.276794 | 30.4 | 13.58159 | 30.5 | 26.61727 | 30.6 | 45.70555 | 30.6 | 86.14267 |
| 30.40000153 | 7.534655383 | 30.50000381 | 13.8803  | 30.6 | 27.14428 | 30.7 | 45.36281 | 30.7 | 83.75409 | 30.4 | 7.284999 | 30.5 | 13.59643 | 30.6 | 26.64644 | 30.7 | 45.7512  | 30.7 | 86.21873 |
| 30.5        | 7.539404756 | 30.60000229 | 13.89196 | 30.6 | 27.16329 | 30.8 | 45.41111 | 30.8 | 83.83314 | 30.5 | 7.293195 | 30.6 | 13.61125 | 30.7 | 26.67197 | 30.8 | 45.79671 | 30.8 | 86.29671 |
| 30.59999847 | 7.545330597 | 30.70000076 | 13.90521 | 30.8 | 27.18572 | 30.9 | 45.45783 | 30.9 | 83.91356 | 30.6 | 7.30138  | 30.7 | 13.62604 | 30.8 | 26.69924 | 30.9 | 45.84207 | 30.9 | 86.36958 |
| 30.69999695 | 7.549429372 | 30.79999924 | 13.91777 | 30.9 | 27.2069  | 31   | 45.49957 | 31   | 83.99306 | 30.7 | 7.309557 | 30.8 | 13.64081 | 30.9 | 26.72645 | 31   | 45.88728 | 31   | 86.44435 |
| 30.79999542 | 7.55667011  | 30.89999771 | 13.93207 | 31   | 27.23429 | 31.1 | 45.54084 | 31.1 | 84.07335 | 30.8 | 7.317724 | 30.9 | 13.65556 | 31   | 26.75361 | 31.1 | 45.93233 | 31.1 | 86.5187  |
| 30.90000153 | 7.561449691 | 31.00000381 | 13.94789 | 31.1 | 27.25633 | 31.2 | 45.57688 | 31.2 | 84.15136 | 30.9 | 7.325881 | 31   | 13.67029 | 31.1 | 26.78071 | 31.2 | 45.97724 | 31.2 | 86.59261 |
| 31          | 7.566226895 | 31.10000229 | 13.9608  | 31.2 | 27.27557 | 31.3 | 45.61774 | 31.3 | 84.23219 | 31   | 7.334029 | 31.1 | 13.68499 | 31.2 | 26.80776 | 31.3 | 46.02199 | 31.3 | 86.66661 |
| 31.09999847 | 7.570770004 | 31.20000076 | 13.96748 | 31.3 | 27.30043 | 31.4 | 45.66376 | 31.4 | 84.30995 | 31.1 | 7.342168 | 31.2 | 13.69967 | 31.3 | 26.83475 | 31.4 | 46.06666 | 31.4 | 86.73917 |
| 31.19999695 | 7.572808731 | 31.29999924 | 13.98187 | 31.4 | 27.32345 | 31.5 | 45.7056  | 31.5 | 84.38618 | 31.2 | 7.350297 | 31.3 | 13.71432 | 31.4 | 26.86169 | 31.5 | 46.11105 | 31.5 | 86.8118  |
| 31.29999542 | 7.579184685 | 31.39999771 | 14.00012 | 31.5 | 27.34437 | 31.6 | 45.74398 | 31.6 | 84.46153 | 31.3 | 7.358416 | 31.4 | 13.72896 | 31.5 | 26.88857 | 31.6 | 46.15536 | 31.6 | 86.88401 |
| 31.40000153 | 7.588096002 | 31.50000381 | 14.01472 | 31.6 | 27.36402 | 31.7 | 45.78615 | 31.7 | 84.54198 | 31.4 | 7.366527 | 31.5 | 13.74356 | 31.6 | 26.91539 | 31.7 | 46.19951 | 31.7 | 86.95579 |
| 31.5        | 7.592032434 | 31.60000229 | 14.02676 | 31.7 | 27.38701 | 31.8 | 45.82638 | 31.8 | 84.62195 | 31.5 | 7.374628 | 31.6 | 13.75815 | 31.7 | 26.94217 | 31.8 | 46.24352 | 31.8 | 87.02715 |
| 31.59999847 | 7.597984137 | 31.70000076 | 14.04288 | 31.8 | 27.40781 | 31.9 | 45.85748 | 31.9 | 84.69265 | 31.6 | 7.382719 | 31.7 | 13.77271 | 31.8 | 26.96888 | 31.9 | 46.28737 | 31.9 | 87.09809 |
| 31.69999695 | 7.609960259 | 31.79999924 | 14.05391 | 31.9 | 27.42377 | 32   | 45.89625 | 32   | 84.76294 | 31.7 | 7.390801 | 31.8 | 13.78725 | 31.9 | 26.99554 | 32   | 46.33108 | 32   | 87.1686  |
| 31.79999542 | 7.616595463 | 31.89999771 | 14.06294 | 32   | 27.4474  | 32.1 | 45.93962 | 32.1 | 84.84175 | 31.8 | 7.398874 | 31.9 | 13.80177 | 32   | 27.02215 | 32.1 | 46.37464 | 32.1 | 87.23869 |
| 31.90000153 | 7.617610214 | 32.00000381 | 14.07651 | 32.1 | 27.47634 | 32.2 | 45.98213 | 32.2 | 84.92221 | 31.9 | 7.406938 | 32   | 13.81626 | 32.1 | 27.04877 | 32.2 | 46.41805 | 32.2 | 87.30836 |
| 32          | 7.623856253 | 32.10000229 | 14.09208 | 32.2 | 27.50079 | 32.3 | 46.02468 | 32.3 | 84.99667 | 32   | 7.414992 | 32.1 | 13.83074 | 32.2 | 27.0752  | 32.3 | 46.46131 | 32.3 | 87.37761 |
| 32.09999847 | 7.633238692 | 32.20000076 | 14.10656 | 32.3 | 27.52628 | 32.4 | 46.06418 | 32.4 | 85.06932 | 32.1 | 7.423036 | 32.2 | 13.84518 | 32.3 | 27.10164 | 32.4 | 46.50443 | 32.4 | 87.44644 |
| 32.19999695 | 7.642314861 | 32.29999924 | 14.11577 | 32.4 | 27.54921 | 32.5 | 46.10512 | 32.5 | 85.14437 | 32.2 | 7.431072 | 32.3 | 13.85961 | 32.4 | 27.12803 | 32.5 | 46.54739 | 32.5 | 87.51485 |
| 32.29999542 | 7.648494216 | 32.39999771 | 14.12742 | 32.5 | 27.57164 | 32.6 | 46.14789 | 32.6 | 85.22244 | 32.3 | 7.439097 | 32.4 | 13.87401 | 32.5 | 27.15437 | 32.6 | 46.59021 | 32.6 | 87.58284 |
| 32.40000153 | 7.655168466 | 32.50000381 | 14.13858 | 32.6 | 27.59503 | 32.7 | 46.19098 | 32.7 | 85.29558 | 32.4 | 7.447115 | 32.5 | 13.88839 | 32.6 | 27.18064 | 32.7 | 46.63288 | 32.7 | 87.65041 |
| 32.5        | 7.659039502 | 32.60000229 | 14.15079 | 32.7 | 27.61785 | 32.8 | 46.23456 | 32.8 | 85.37228 | 32.5 | 7.455122 | 32.6 | 13.90275 | 32.7 | 27.20687 | 32.8 | 46.6754  | 32.8 | 87.71757 |
| 32.59999847 | 7.666402687 | 32.70000076 | 14.16329 | 32.8 | 27.64567 | 32.9 | 46.2737  | 32.9 | 85.44748 | 32.6 | 7.46312  | 32.7 | 13.91708 | 32.8 | 27.23304 | 32.9 | 46.71778 | 32.9 | 87.78432 |
| 32.69999695 | 7.671045665 | 32.79999924 | 14.17796 | 32.9 | 27.67046 | 33   | 46.31886 | 33   | 85.52257 | 32.7 | 7.471108 | 32.8 | 13.93139 | 32.9 | 27.25916 | 33   | 46.76001 | 33   | 87.85065 |
| 32.79999542 | 7.679377613 | 32.89999771 | 14.19233 | 33   | 27.69427 | 33.1 | 46.35887 | 33.1 | 85.59592 | 32.8 | 7.479088 | 32.9 | 13.94568 | 33   | 27.28522 | 33.1 | 46.80209 | 33.1 | 87.91656 |
| 32.90000153 | 7.688473218 | 33.00000381 | 14.20798 | 33.1 | 27.71776 | 33.2 | 46.39205 | 33.2 | 85.66935 | 32.9 | 7.487058 | 33   | 13.95995 | 33.1 | 27.31123 | 33.2 | 46.84402 | 33.2 | 87.98206 |
| 33          | 7.698314797 | 33.10000229 | 14.22212 | 33.2 | 27.74033 | 33.3 | 46.42824 | 33.3 | 85.74178 | 33   | 7.495019 | 33.1 | 13.97419 | 33.2 | 27.33718 | 33.3 | 46.88581 | 33.3 | 88.04715 |
| 33.09999847 | 7.704108463 | 33.20000076 | 14.23293 | 33.3 | 27.76066 | 33.4 | 46.46297 | 33.4 | 85.81005 | 33.1 | 7.502971 | 33.2 | 13.98841 | 33.3 | 27.36308 | 33.4 | 46.92745 | 33.4 | 88.11184 |
| 33.19999695 | 7.707542859 | 33.29999924 | 14.24718 | 33.4 | 27.77806 | 33.5 | 46.50111 | 33.5 | 85.88224 | 33.2 | 7.510913 | 33.3 | 14.00261 | 33.4 | 27.38893 | 33.5 | 46.96985 | 33.5 | 88.17611 |
| 33.29999542 | 7.712249075 | 33.39999771 | 14.25479 | 33.5 | 27.79986 | 33.6 | 46.53794 | 33.6 | 85.94839 | 33.3 | 7.518846 | 33.4 | 14.01678 | 33.5 | 27.41472 | 33.6 | 47.0103  | 33.6 | 88.23997 |
| 33.40000153 | 7.715896389 | 33.50000381 | 14.26876 | 33.6 | 27.81913 | 33.7 | 46.57558 | 33.7 | 86.01913 | 33.4 | 7.526771 | 33.5 | 14.03094 | 33.6 | 27.44046 | 33.7 | 47.0515  | 33.7 | 88.30343 |
| 33.5        | 7.722898407 | 33.60000229 | 14.2849  | 33.7 | 27.84264 | 33.8 | 46.61394 | 33.8 | 86.08357 | 33.5 | 7.534685 | 33.6 | 14.04507 | 33.7 | 27.46614 | 33.8 | 47.09256 | 33.8 | 88.36648 |
| 33.59999847 | 7.731948922 | 33.70000076 | 14.29934 | 33.8 | 27.86245 | 33.9 | 46.65348 | 33.9 | 86.14787 | 33.6 | 7.542591 | 33.7 | 14.05917 | 33.8 | 27.49177 | 33.9 | 47.13348 | 33.9 | 88.42913 |
| 33.69999695 | 7.739898726 | 33.79999924 | 14.31111 | 33.9 | 27.88448 | 34   | 46.69908 | 34   | 86.21855 | 33.7 | 7.550487 | 33.8 | 14.07326 | 33.9 | 27.51735 | 34   | 47.17425 | 34   | 88.49137 |
| 33.79999542 | 7.748349099 | 33.89999771 | 14.32284 | 34   | 27.90946 | 34.1 | 46.73828 | 34.1 | 86.28969 | 33.8 | 7.558374 | 33.9 | 14.08732 | 34   | 27.54283 | 34.1 | 47.21487 | 34.1 | 88.5532  |
| 33.90000153 | 7.753710219 | 34.00000381 | 14.34163 | 34.1 | 27.93035 | 34.2 | 46.77931 | 34.2 | 86.36328 | 33.9 | 7.566252 | 34   | 14.10136 | 34.1 | 27.56834 | 34.2 | 47.25535 | 34.2 | 88.61464 |
| 34          | 7.760525848 | 34.10000229 | 14.35749 | 34.2 | 27.95754 | 34.3 | 46.81763 | 34.3 | 86.43444 | 34   | 7.574121 | 34.1 | 14.11538 | 34.2 | 27.59376 | 34.3 | 47.29569 | 34.3 | 88.67567 |
| 34.09999847 | 7.767614238 | 34.20000076 | 14.37266 | 34.3 | 27.98232 | 34.4 | 46.85852 | 34.4 | 86.50821 | 34.1 | 7.58198  | 34.2 | 14.12938 | 34.3 | 27.61912 | 34.4 | 47.33588 | 34.4 | 88.73631 |
| 34.19999695 | 7.77586447  | 34.29999924 | 14.38379 | 34.4 | 28.00728 | 34.5 | 46.89824 | 34.5 | 86.57856 | 34.2 | 7.589831 | 34.3 | 14.14335 | 34.4 | 27.64443 | 34.5 | 47.37593 | 34.5 | 88.79654 |
| 34.29999542 | 7.783845032 | 34.39999771 | 14.40142 | 34.5 | 28.02805 | 34.6 | 46.94091 | 34.6 | 86.65032 | 34.3 | 7.597672 | 34.4 | 14.1573  | 34.5 | 27.66968 | 34.6 | 47.41583 | 34.6 | 88.85638 |
| 34.40000153 | 7.795725424 | 34.50000381 | 14.41512 | 34.6 | 28.04976 | 34.7 | 46.97953 | 34.7 | 86.72229 | 34.4 | 7.605504 | 34.5 | 14.17123 | 34.6 | 27.69498 | 34.7 | 47.45559 | 34.7 | 88.91582 |
| 34.5        | 7.803481323 | 34.60000229 | 14.42746 | 34.7 | 28.07286 | 34.8 | 47.01871 | 34.8 | 86.79472 | 34.5 | 7.613327 | 34.6 | 14.18513 | 34.7 | 27.72004 | 34.8 | 47.49521 | 34.8 | 88.97487 |
| 34.59999847 | 7.808696196 | 34.70000076 | 14.43519 | 34.8 | 28.09418 | 34.9 | 47.05419 | 34.9 | 86.86597 | 34.6 | 7.621141 | 34.7 | 14.19902 | 34.8 | 27.74513 | 34.9 | 47.53469 | 34.9 | 89.03353 |
| 34.69999695 | 7.817129409 | 34.79999924 | 14.44793 | 34.9 | 28.11561 | 35   | 47.09198 | 35   | 86.94119 | 34.7 | 7.628946 | 34.8 | 14.21288 | 34.9 | 27.77018 | 35   | 47.57402 | 35   | 89.09179 |
| 34.79999542 | 7.822863783 | 34.89999771 | 14.45638 | 35   | 28.14162 | 35.1 | 47.12692 | 35.1 | 87.01251 | 34.8 | 7.636741 | 34.9 | 14.22672 | 35   | 27.79517 | 35.1 | 47.61321 | 35.1 | 89.14966 |
| 34.90000153 | 7.828695934 | 35.00000381 | 14.46744 | 35.1 | 28.16597 | 35.2 | 47.16345 | 35.2 | 87.08806 | 34.9 | 7.644528 | 35   | 14.24054 | 35.1 | 27.82031 | 35.2 | 47.65226 | 35.2 | 89.20714 |
| 35          | 7.836728899 | 35.10000229 | 14.47842 | 35.2 | 28.1912  | 35.3 | 47.19773 | 35.3 | 87.16341 | 35   | 7.652306 | 35.1 | 14.25433 | 35.2 | 27.84499 | 35.3 |          |      |          |

|             |              |             |          |      |          |      |          |      |          |      |          |      |          |      |          |      |          |      |          |
|-------------|--------------|-------------|----------|------|----------|------|----------|------|----------|------|----------|------|----------|------|----------|------|----------|------|----------|
| 41.40000153 | 8.308201653  | 41.50000381 | 15.26312 | 41.6 | 29.48196 | 41.7 | 49.54855 | 41.7 | 91.5565  | 41.4 | 8.131559 | 41.5 | 15.09228 | 41.6 | 29.33058 | 41.7 | 49.89779 | 41.7 | 92.17413 |
| 41.5        | 8.318215222  | 41.6000229  | 15.27202 | 41.7 | 29.50258 | 41.8 | 49.58647 | 41.8 | 91.6176  | 41.5 | 8.138764 | 41.6 | 15.10469 | 41.7 | 29.35217 | 41.8 | 49.92804 | 41.8 | 92.20909 |
| 41.59999847 | 8.32441101   | 41.70000076 | 15.28341 | 41.8 | 29.52008 | 41.9 | 49.61452 | 41.9 | 91.6751  | 41.6 | 8.145961 | 41.7 | 15.11708 | 41.8 | 29.37371 | 41.9 | 49.95816 | 41.9 | 92.24375 |
| 41.69999695 | 8.334896752  | 41.79999924 | 15.29714 | 41.9 | 29.53182 | 42   | 49.64718 | 42   | 91.73851 | 41.7 | 8.153149 | 41.8 | 15.12945 | 41.9 | 29.3952  | 42   | 49.98817 | 42   | 92.27813 |
| 41.79999542 | 8.343293246  | 41.89999771 | 15.3028  | 42   | 29.54938 | 42.1 | 49.68094 | 42.1 | 91.80273 | 41.8 | 8.160329 | 41.9 | 15.1418  | 42   | 29.41664 | 42.1 | 50.01804 | 42.1 | 92.31223 |
| 41.90000153 | 8.345366421  | 42.00000381 | 15.3109  | 42.1 | 29.5629  | 42.2 | 49.71715 | 42.2 | 91.86795 | 41.9 | 8.167501 | 42   | 15.15413 | 42.1 | 29.43803 | 42.2 | 50.0478  | 42.2 | 92.34604 |
| 42          | 8.350223144  | 42.10000229 | 15.31843 | 42.2 | 29.58665 | 42.3 | 49.75829 | 42.3 | 91.93597 | 42   | 8.174664 | 42.1 | 15.16643 | 42.2 | 29.45938 | 42.3 | 50.07743 | 42.3 | 92.37958 |
| 42.09999847 | 8.353340483  | 42.20000076 | 15.33101 | 42.3 | 29.60479 | 42.4 | 49.79489 | 42.4 | 92.00411 | 42.2 | 8.181818 | 42.2 | 15.17872 | 42.3 | 29.48068 | 42.4 | 50.10695 | 42.4 | 92.41283 |
| 42.19999695 | 8.362798882  | 42.29999924 | 15.34371 | 42.4 | 29.62292 | 42.5 | 49.83316 | 42.5 | 92.0736  | 42.2 | 8.188964 | 42.3 | 15.19099 | 42.4 | 29.50193 | 42.5 | 50.13634 | 42.5 | 92.44581 |
| 42.29999542 | 8.37392162   | 42.39999771 | 15.35648 | 42.5 | 29.6449  | 42.6 | 49.86658 | 42.6 | 92.13608 | 42.3 | 8.196102 | 42.4 | 15.20323 | 42.5 | 29.52313 | 42.6 | 50.1656  | 42.6 | 92.47851 |
| 42.40000153 | 8.381813097  | 42.50000381 | 15.37614 | 42.6 | 29.66164 | 42.7 | 49.89683 | 42.7 | 92.19765 | 42.4 | 8.203231 | 42.5 | 15.21546 | 42.6 | 29.54428 | 42.7 | 50.19475 | 42.7 | 92.51094 |
| 42.5        | 8.391345951  | 42.60000229 | 15.3884  | 42.7 | 29.67758 | 42.8 | 49.93042 | 42.8 | 92.25946 | 42.5 | 8.210352 | 42.6 | 15.22767 | 42.7 | 29.56538 | 42.8 | 50.22378 | 42.8 | 92.5431  |
| 42.59999847 | 8.398074918  | 42.70000076 | 15.40277 | 42.8 | 29.69766 | 42.9 | 49.96599 | 42.9 | 92.31735 | 42.6 | 8.217464 | 42.7 | 15.23985 | 42.8 | 29.58644 | 42.9 | 50.25268 | 42.9 | 92.57498 |
| 42.69999695 | 8.402790739  | 42.79999924 | 15.41542 | 42.9 | 29.71588 | 43   | 50.00308 | 43   | 92.38018 | 42.7 | 8.224568 | 42.8 | 15.25202 | 42.9 | 29.60745 | 43   | 50.28147 | 43   | 92.6066  |
| 42.79999542 | 8.409995835  | 42.89999771 | 15.42729 | 43   | 29.73685 | 43.1 | 50.03945 | 43.1 | 92.44352 | 42.8 | 8.231663 | 42.9 | 15.26416 | 43   | 29.62841 | 43.1 | 50.31013 | 43.1 | 92.63795 |
| 42.90000153 | 8.4113856815 | 43.00000381 | 15.43945 | 43.1 | 29.75605 | 43.2 | 50.07491 | 43.2 | 92.51009 | 42.9 | 8.238751 | 43   | 15.27629 | 43.1 | 29.64933 | 43.2 | 50.33868 | 43.2 | 92.66903 |
| 43          | 8.423218812  | 43.10000229 | 15.45223 | 43.2 | 29.77751 | 43.3 | 50.11276 | 43.3 | 92.57304 | 43   | 8.245829 | 43.1 | 15.28839 | 43.2 | 29.67019 | 43.3 | 50.36711 | 43.3 | 92.69985 |
| 43.09999847 | 8.428790623  | 43.20000076 | 15.47053 | 43.3 | 29.79621 | 43.4 | 50.14483 | 43.4 | 92.63433 | 43.1 | 8.252899 | 43.2 | 15.30048 | 43.3 | 29.69101 | 43.4 | 50.39542 | 43.4 | 92.73041 |
| 43.19999695 | 8.438539659  | 43.29999924 | 15.48423 | 43.4 | 29.8098  | 43.5 | 50.17605 | 43.5 | 92.69949 | 43.2 | 8.259961 | 43.3 | 15.31254 | 43.4 | 29.71179 | 43.5 | 50.4236  | 43.5 | 92.76071 |
| 43.29999542 | 8.446412447  | 43.39999771 | 15.48869 | 43.5 | 29.82662 | 43.6 | 50.20727 | 43.6 | 92.76408 | 43.3 | 8.267014 | 43.4 | 15.32459 | 43.5 | 29.73251 | 43.6 | 50.45167 | 43.6 | 92.79075 |
| 43.40000153 | 8.451043722  | 43.50000381 | 15.49517 | 43.6 | 29.84779 | 43.7 | 50.24134 | 43.7 | 92.82706 | 43.4 | 8.27406  | 43.5 | 15.33661 | 43.6 | 29.75319 | 43.7 | 50.47963 | 43.7 | 92.82053 |
| 43.5        | 8.455487228  | 43.60000229 | 15.50479 | 43.7 | 29.86598 | 43.8 | 50.272   | 43.8 | 92.88692 | 43.5 | 8.281097 | 43.6 | 15.34862 | 43.7 | 29.77382 | 43.8 | 50.50746 | 43.8 | 92.85005 |
| 43.59999847 | 8.461346165  | 43.70000076 | 15.51623 | 43.8 | 29.87934 | 43.9 | 50.30764 | 43.9 | 92.9489  | 43.6 | 8.288125 | 43.7 | 15.3606  | 43.8 | 29.7944  | 43.9 | 50.53518 | 43.9 | 92.87933 |
| 43.69999695 | 8.471012337  | 43.79999924 | 15.52625 | 43.9 | 29.89681 | 44   | 50.3437  | 44   | 93.01395 | 43.7 | 8.295145 | 43.8 | 15.37257 | 43.9 | 29.81494 | 44   | 50.56278 | 44   | 92.90835 |
| 43.79999542 | 8.476992872  | 43.89999771 | 15.53721 | 44   | 29.91293 | 44.1 | 50.37725 | 44.1 | 93.0793  | 43.8 | 8.302157 | 43.9 | 15.38541 | 44   | 29.83542 | 44.1 | 50.59026 | 44.1 | 92.93712 |
| 43.90000153 | 8.483293538  | 44.00000381 | 15.5505  | 44.1 | 29.93451 | 44.2 | 50.4097  | 44.2 | 93.14002 | 43.9 | 8.30916  | 44   | 15.39644 | 44.1 | 29.85587 | 44.2 | 50.61763 | 44.2 | 92.96564 |
| 44          | 8.486148117  | 44.10000229 | 15.56326 | 44.2 | 29.95426 | 44.3 | 50.4433  | 44.3 | 93.20512 | 44   | 8.316155 | 44.1 | 15.40834 | 44.2 | 29.87626 | 44.3 | 50.64488 | 44.3 | 92.99391 |
| 44.09999847 | 8.491841597  | 44.20000076 | 15.57366 | 44.3 | 29.9773  | 44.4 | 50.47485 | 44.4 | 93.26823 | 44.1 | 8.323142 | 44.2 | 15.42023 | 44.3 | 29.89661 | 44.4 | 50.67202 | 44.4 | 93.02194 |
| 44.19999695 | 8.50081079   | 44.29999924 | 15.58678 | 44.4 | 29.99876 | 44.5 | 50.50619 | 44.5 | 93.32862 | 44.2 | 8.330121 | 44.3 | 15.4321  | 44.4 | 29.91691 | 44.5 | 50.69904 | 44.5 | 93.04973 |
| 44.29999542 | 8.50520591   | 44.39999771 | 15.59882 | 44.5 | 30.01678 | 44.6 | 50.53196 | 44.6 | 93.38422 | 44.3 | 8.337091 | 44.4 | 15.44394 | 44.5 | 29.93717 | 44.6 | 50.72594 | 44.6 | 93.07727 |
| 44.40000153 | 8.5128859    | 44.50000381 | 15.61135 | 44.6 | 30.03413 | 44.7 | 50.56704 | 44.7 | 93.44727 | 44.4 | 8.344053 | 44.5 | 15.45577 | 44.6 | 29.95737 | 44.7 | 50.75273 | 44.7 | 93.10457 |
| 44.5        | 8.518474813  | 44.60000229 | 15.6212  | 44.7 | 30.05364 | 44.8 | 50.59709 | 44.8 | 93.50899 | 44.5 | 8.351007 | 44.6 | 15.46758 | 44.7 | 29.97753 | 44.8 | 50.77941 | 44.8 | 93.13163 |
| 44.59999847 | 8.518254606  | 44.70000076 | 15.63328 | 44.8 | 30.07321 | 44.9 | 50.6291  | 44.9 | 93.56935 | 44.6 | 8.357952 | 44.7 | 15.47936 | 44.8 | 29.99807 | 44.9 | 50.80597 | 44.9 | 93.15846 |
| 44.69999695 | 8.527748642  | 44.79999924 | 15.64381 | 44.9 | 30.09333 | 45   | 50.66035 | 45   | 93.63154 | 44.7 | 8.364889 | 44.8 | 15.49113 | 44.9 | 30.01772 | 45   | 50.83242 | 45   | 93.18505 |
| 44.79999542 | 8.534984037  | 44.89999771 | 15.65465 | 45   | 30.11136 | 45.1 | 50.70213 | 45.1 | 93.70018 | 44.8 | 8.371818 | 44.9 | 15.50288 | 45   | 30.03774 | 45.1 | 50.85875 | 45.1 | 93.21141 |
| 44.90000153 | 8.541132036  | 45.00000381 | 15.6666  | 45.1 | 30.13283 | 45.2 | 50.74081 | 45.2 | 93.76501 | 44.9 | 8.378739 | 45   | 15.51461 | 45.1 | 30.05772 | 45.2 | 50.88497 | 45.2 | 93.23753 |
| 45          | 8.547110474  | 45.10000229 | 15.68108 | 45.2 | 30.15253 | 45.3 | 50.77832 | 45.3 | 93.8275  | 45   | 8.385652 | 45.1 | 15.52631 | 45.2 | 30.07765 | 45.3 | 50.91108 | 45.3 | 93.26343 |
| 45.09999847 | 8.55545755   | 45.20000076 | 15.69207 | 45.3 | 30.17215 | 45.4 | 50.80642 | 45.4 | 93.88735 | 45.1 | 8.392556 | 45.2 | 15.538   | 45.3 | 30.09753 | 45.4 | 50.93707 | 45.4 | 93.28909 |
| 45.19999695 | 8.561453821  | 45.29999924 | 15.70597 | 45.4 | 30.18957 | 45.5 | 50.84022 | 45.5 | 93.95152 | 45.2 | 8.399452 | 45.3 | 15.54967 | 45.4 | 30.11737 | 45.5 | 50.96296 | 45.5 | 93.31453 |
| 45.29999542 | 8.568340664  | 45.39999771 | 15.71398 | 45.5 | 30.2103  | 45.6 | 50.87308 | 45.6 | 94.01713 | 45.3 | 8.40634  | 45.4 | 15.56132 | 45.5 | 30.13716 | 45.6 | 50.98873 | 45.6 | 93.33974 |
| 45.40000153 | 8.577195389  | 45.50000381 | 15.72562 | 45.6 | 30.23117 | 45.7 | 50.90551 | 45.7 | 94.08143 | 45.4 | 8.41322  | 45.5 | 15.57295 | 45.6 | 30.15691 | 45.7 | 51.01439 | 45.7 | 93.36473 |
| 45.5        | 8.586689297  | 45.60000229 | 15.7357  | 45.7 | 30.25066 | 45.8 | 50.93604 | 45.8 | 94.14337 | 45.5 | 8.420091 | 45.6 | 15.58456 | 45.7 | 30.17661 | 45.8 | 51.03994 | 45.8 | 93.38949 |
| 45.59999847 | 8.59549746   | 45.70000076 | 15.74581 | 45.8 | 30.26774 | 45.9 | 50.9666  | 45.9 | 94.20362 | 45.6 | 8.426954 | 45.7 | 15.59615 | 45.8 | 30.19626 | 45.9 | 51.06537 | 45.9 | 93.41404 |
| 45.69999695 | 8.599246343  | 45.79999924 | 15.75278 | 45.9 | 30.28375 | 46   | 51.00383 | 46   | 94.26799 | 45.7 | 8.433809 | 45.8 | 15.60772 | 45.9 | 30.21587 | 46   | 51.0907  | 46   | 93.43836 |
| 45.79999542 | 8.604550556  | 45.89999771 | 15.75798 | 46   | 30.30448 | 46.1 | 51.04207 | 46.1 | 94.33419 | 45.8 | 8.440656 | 45.9 | 15.61928 | 46   | 30.23544 | 46.1 | 51.11922 | 46.1 | 93.46247 |
| 45.90000153 | 8.60943894   | 46.00000381 | 15.77086 | 46.1 | 30.32786 | 46.2 | 51.07089 | 46.2 | 94.39524 | 45.9 | 8.447496 | 46   | 15.63081 | 46.1 | 30.25495 | 46.2 | 51.14102 | 46.2 | 93.48635 |
| 46          | 8.617019957  | 46.10000229 | 15.78673 | 46.2 | 30.34936 | 46.3 | 51.10125 | 46.3 | 94.45376 | 46   | 8.454326 | 46.1 | 15.64232 | 46.2 | 30.27443 | 46.3 | 51.16602 | 46.3 | 93.51003 |
| 46.09999847 | 8.628464187  | 46.20000076 | 15.7986  | 46.3 | 30.36788 | 46.4 | 51.13621 | 46.4 | 94.51792 | 46.1 | 8.461149 | 46.2 | 15.65382 | 46.3 | 30.29385 | 46.4 | 51.19091 | 46.4 | 93.53349 |
| 46.19999695 | 8.634376256  | 46.29999924 | 15.80658 | 46.4 | 30.38618 | 46.5 | 51.1714  | 46.5 | 94.58213 | 46.2 | 8.467963 | 46.3 | 15.66529 | 46.4 | 30.31324 | 46.5 | 51.21569 | 46.5 | 93.55674 |
| 46.29999542 | 8.640556667  | 46.39999771 | 15.817   | 46.5 | 30.40189 | 46.6 | 51.20762 | 46.6 | 94.64745 | 46.3 | 8.474769 | 46.4 | 15.67675 | 46.5 | 30.33257 | 46.6 | 51.24036 | 46.6 | 93.57978 |
| 46.40000153 | 8.650187444  | 46.50000381 | 15.82805 | 46.6 | 30.42108 | 46.7 | 51.24265 | 46.7 | 94.71161 | 46.4 | 8.481568 | 46.5 | 15.68819 | 46.6 | 30.35186 | 46.7 | 51.26492 | 46.7 | 93.60261 |
| 46.5        | 8.657672236  | 46.60000229 | 15.83886 | 46.7 | 30.44443 | 46.8 | 51.27471 | 46.8 | 94.77392 | 46.5 | 8.488358 | 46.6 | 15.6996  | 46.7 | 30.37111 | 46.8 | 51.28937 | 46.8 |          |

|             |              |             |          |      |          |      |          |      |          |      |          |      |          |      |          |      |          |      |          |
|-------------|--------------|-------------|----------|------|----------|------|----------|------|----------|------|----------|------|----------|------|----------|------|----------|------|----------|
| 52.90000153 | 9.058707469  | 53.00000381 | 16.55249 | 53.1 | 31.56175 | 53.2 | 53.28544 | 53.2 | 98.61547 | 52.9 | 8.90645  | 53   | 16.39148 | 53.1 | 31.51237 | 53.2 | 52.64495 | 53.2 | 94.70876 |
| 53          | 9.064055585  | 53.10000229 | 16.56078 | 53.2 | 31.58156 | 53.3 | 53.32109 | 53.3 | 98.67262 | 53   | 8.912731 | 53.1 | 16.4017  | 53.2 | 31.52883 | 53.3 | 52.66309 | 53.3 | 94.72094 |
| 53.09999847 | 9.067944717  | 53.20000076 | 16.57213 | 53.3 | 31.60026 | 53.4 | 53.35203 | 53.4 | 98.72938 | 53.1 | 8.919004 | 53.2 | 16.4119  | 53.3 | 31.54526 | 53.4 | 52.68115 | 53.4 | 94.73301 |
| 53.19999695 | 9.0707068938 | 53.29999924 | 16.58189 | 53.4 | 31.6201  | 53.5 | 53.37968 | 53.5 | 98.79073 | 53.2 | 8.92527  | 53.3 | 16.42209 | 53.4 | 31.56165 | 53.5 | 52.69912 | 53.5 | 94.74495 |
| 53.29999542 | 9.085419201  | 53.39999771 | 16.59305 | 53.5 | 31.63754 | 53.6 | 53.40641 | 53.6 | 98.84666 | 53.3 | 8.931529 | 53.4 | 16.43226 | 53.5 | 31.578   | 53.6 | 52.71701 | 53.6 | 94.75677 |
| 53.40000153 | 9.096811389  | 53.50000381 | 16.60669 | 53.6 | 31.65203 | 53.7 | 53.43334 | 53.7 | 98.90204 | 53.4 | 8.93778  | 53.5 | 16.44241 | 53.6 | 31.59431 | 53.7 | 52.7348  | 53.7 | 94.76848 |
| 53.5        | 9.105872293  | 53.60000229 | 16.61481 | 53.7 | 31.66842 | 53.8 | 53.46039 | 53.8 | 98.95708 | 53.5 | 8.944023 | 53.6 | 16.45254 | 53.7 | 31.61058 | 53.8 | 52.75252 | 53.8 | 94.78007 |
| 53.59999847 | 9.110680819  | 53.70000076 | 16.62311 | 53.8 | 31.68736 | 53.9 | 53.48824 | 53.9 | 99.0144  | 53.6 | 8.950259 | 53.7 | 16.46266 | 53.8 | 31.62681 | 53.9 | 52.77015 | 53.9 | 94.79155 |
| 53.69999695 | 9.112669812  | 53.79999924 | 16.6335  | 53.9 | 31.70728 | 54   | 53.51426 | 54   | 99.07182 | 53.7 | 8.956487 | 53.8 | 16.47276 | 53.9 | 31.64299 | 54   | 52.7877  | 54   | 94.80291 |
| 53.79999542 | 9.119498484  | 53.89999771 | 16.64688 | 54   | 31.72127 | 54.1 | 53.54959 | 54.1 | 99.13375 | 53.8 | 8.962708 | 53.9 | 16.48284 | 54   | 31.65914 | 54.1 | 52.80516 | 54.1 | 94.81417 |
| 53.90000153 | 9.1217189643 | 54.00000381 | 16.66056 | 54.1 | 31.74122 | 54.2 | 53.57791 | 54.2 | 99.19169 | 53.9 | 8.968921 | 54   | 16.49291 | 54.1 | 31.67525 | 54.2 | 52.82254 | 54.2 | 94.82531 |
| 54          | 9.134987446  | 54.10000229 | 16.67547 | 54.2 | 31.75704 | 54.3 | 53.60677 | 54.3 | 99.24901 | 54   | 8.975127 | 54.1 | 16.50295 | 54.2 | 31.69132 | 54.3 | 52.83983 | 54.3 | 94.83634 |
| 54.09999847 | 9.143594285  | 54.20000076 | 16.68251 | 54.3 | 31.77048 | 54.4 | 53.63178 | 54.4 | 99.3042  | 54.1 | 8.981325 | 54.2 | 16.51298 | 54.3 | 31.70735 | 54.4 | 52.85704 | 54.4 | 94.84726 |
| 54.19999695 | 9.150814558  | 54.29999924 | 16.6955  | 54.4 | 31.78398 | 54.5 | 53.65739 | 54.5 | 99.35511 | 54.2 | 8.987516 | 54.3 | 16.52299 | 54.4 | 31.72334 | 54.5 | 52.87417 | 54.5 | 94.85807 |
| 54.29999542 | 9.156802383  | 54.39999771 | 16.70504 | 54.5 | 31.79651 | 54.6 | 53.68519 | 54.6 | 99.40766 | 54.3 | 8.993699 | 54.4 | 16.53299 | 54.5 | 31.73929 | 54.6 | 52.89122 | 54.6 | 94.86877 |
| 54.40000153 | 9.161739578  | 54.50000381 | 16.71034 | 54.6 | 31.81495 | 54.7 | 53.71213 | 54.7 | 99.46145 | 54.4 | 8.999875 | 54.5 | 16.54297 | 54.6 | 31.7552  | 54.7 | 52.90818 | 54.7 | 94.87937 |
| 54.5        | 9.162375965  | 54.60000229 | 16.72306 | 54.7 | 31.82819 | 54.8 | 53.74233 | 54.8 | 99.51682 | 54.5 | 9.000644 | 54.6 | 16.55293 | 54.7 | 31.77107 | 54.8 | 52.92507 | 54.8 | 94.88986 |
| 54.59999847 | 9.169589622  | 54.70000076 | 16.73323 | 54.8 | 31.8446  | 54.9 | 53.77066 | 54.9 | 99.57021 | 54.6 | 9.012205 | 54.7 | 16.56287 | 54.8 | 31.7869  | 54.9 | 52.94187 | 54.9 | 94.90025 |
| 54.69999695 | 9.176237762  | 54.79999924 | 16.74382 | 54.9 | 31.86207 | 55   | 53.80278 | 55   | 99.62034 | 54.7 | 9.018358 | 54.8 | 16.57279 | 54.9 | 31.8027  | 55   | 52.95859 | 55   | 94.91054 |
| 54.79999542 | 9.186146941  | 54.89999771 | 16.75605 | 55   | 31.87673 | 55.1 | 53.84109 | 55.1 | 99.67887 | 54.8 | 9.024504 | 54.9 | 16.5827  | 55   | 31.81845 | 55.1 | 52.97523 | 55.1 | 94.92072 |
| 54.90000153 | 9.195145599  | 55.00000381 | 16.76677 | 55.1 | 31.89534 | 55.2 | 53.87225 | 55.2 | 99.73459 | 54.9 | 9.030643 | 55   | 16.59259 | 55.1 | 31.83417 | 55.2 | 52.99179 | 55.2 | 94.9308  |
| 55          | 9.199782096  | 55.10000229 | 16.78012 | 55.2 | 31.9113  | 55.3 | 53.90233 | 55.3 | 99.78624 | 54.9 | 9.036774 | 55.1 | 16.60247 | 55.2 | 31.84984 | 55.3 | 53.00826 | 55.3 | 94.94078 |
| 55.09999847 | 9.209221248  | 55.20000076 | 16.79278 | 55.3 | 31.92673 | 55.4 | 53.93156 | 55.4 | 99.83554 | 55   | 9.042898 | 55.2 | 16.61233 | 55.3 | 31.86548 | 55.4 | 53.02466 | 55.4 | 94.95066 |
| 55.19999695 | 9.214512457  | 55.29999924 | 16.80308 | 55.4 | 31.93969 | 55.5 | 53.96135 | 55.5 | 99.8865  | 55.1 | 9.049014 | 55.3 | 16.62217 | 55.4 | 31.88108 | 55.5 | 53.04098 | 55.5 | 94.96044 |
| 55.29999542 | 9.219012374  | 55.39999771 | 16.80739 | 55.5 | 31.95954 | 55.6 | 53.98942 | 55.6 | 99.93544 | 55.3 | 9.055123 | 55.4 | 16.63199 | 55.5 | 31.89664 | 55.6 | 53.05722 | 55.6 | 94.97013 |
| 55.40000153 | 9.215890994  | 55.50000381 | 16.82024 | 55.6 | 31.97336 | 55.7 | 54.01456 | 55.7 | 99.98477 | 55.4 | 9.061225 | 55.5 | 16.64418 | 55.6 | 31.91216 | 55.7 | 53.07338 | 55.7 | 94.97971 |
| 55.5        | 9.216580726  | 55.60000229 | 16.82911 | 55.7 | 31.98764 | 55.8 | 54.03892 | 55.8 | 100.0381 | 55.5 | 9.06732  | 55.6 | 16.65158 | 55.7 | 31.92764 | 55.8 | 53.08946 | 55.8 | 94.9892  |
| 55.59999847 | 9.21891602   | 55.70000076 | 16.84027 | 55.8 | 32.00091 | 55.9 | 54.0708  | 55.9 | 100.0967 | 55.6 | 9.073406 | 55.7 | 16.66136 | 55.8 | 31.94308 | 55.9 | 53.10547 | 55.9 | 94.9986  |
| 55.69999695 | 9.22033517   | 55.79999924 | 16.84781 | 55.9 | 32.01721 | 56   | 54.10281 | 56   | 100.1504 | 55.7 | 9.079486 | 55.8 | 16.67111 | 55.9 | 31.95849 | 56   | 53.12139 | 56   | 95.0079  |
| 55.79999542 | 9.226789722  | 55.89999771 | 16.86026 | 56   | 32.03094 | 56.1 | 54.13063 | 56.1 | 100.2026 | 55.8 | 9.085558 | 55.9 | 16.68085 | 56   | 31.97386 | 56.1 | 53.13724 | 56.1 | 95.0171  |
| 55.90000153 | 9.232065805  | 56.00000381 | 16.86944 | 56.1 | 32.04613 | 56.2 | 54.1529  | 56.2 | 100.2547 | 55.9 | 9.091623 | 56   | 16.69057 | 56.1 | 31.98918 | 56.2 | 53.15031 | 56.2 | 95.02622 |
| 56          | 9.234093378  | 56.10000229 | 16.87494 | 56.2 | 32.0561  | 56.3 | 54.17876 | 56.3 | 100.3112 | 56   | 9.097681 | 56.1 | 16.70028 | 56.2 | 32.00447 | 56.3 | 53.1687  | 56.3 | 95.0344  |
| 56.09999847 | 9.237161027  | 56.20000076 | 16.87737 | 56.3 | 32.07049 | 56.4 | 54.20493 | 56.4 | 100.3648 | 56.1 | 9.103731 | 56.2 | 16.70996 | 56.3 | 32.01973 | 56.4 | 53.18432 | 56.4 | 95.04417 |
| 56.19999695 | 9.237808192  | 56.29999924 | 16.88384 | 56.4 | 32.08601 | 56.5 | 54.2293  | 56.5 | 100.4148 | 56.2 | 9.109774 | 56.3 | 16.71963 | 56.4 | 32.03494 | 56.5 | 53.19986 | 56.5 | 95.05302 |
| 56.29999542 | 9.24585609   | 56.39999771 | 16.89027 | 56.5 | 32.09981 | 56.6 | 54.25816 | 56.6 | 100.4639 | 56.3 | 9.115809 | 56.4 | 16.72929 | 56.5 | 32.05012 | 56.6 | 53.21532 | 56.6 | 95.06177 |
| 56.40000153 | 9.254267645  | 56.50000381 | 16.89926 | 56.6 | 32.11504 | 56.7 | 54.28448 | 56.7 | 100.5156 | 56.4 | 9.121838 | 56.5 | 16.73892 | 56.6 | 32.06252 | 56.7 | 53.23071 | 56.7 | 95.07043 |
| 56.5        | 9.25723964   | 56.60000229 | 16.90992 | 56.7 | 32.12674 | 56.8 | 54.31119 | 56.8 | 100.5649 | 56.5 | 9.127859 | 56.6 | 16.74855 | 56.7 | 32.08035 | 56.8 | 53.24602 | 56.8 | 95.07901 |
| 56.59999847 | 9.262444488  | 56.70000076 | 16.91927 | 56.8 | 32.13411 | 56.9 | 54.33482 | 56.9 | 100.6104 | 56.6 | 9.133872 | 56.7 | 16.75815 | 56.8 | 32.09542 | 56.9 | 53.26126 | 56.9 | 95.0875  |
| 56.69999695 | 9.267894745  | 56.79999924 | 16.92644 | 56.9 | 32.1438  | 57   | 54.36562 | 57   | 100.6571 | 56.7 | 9.139878 | 56.8 | 16.76774 | 56.9 | 32.11044 | 57   | 53.27642 | 57   | 95.09591 |
| 56.79999542 | 9.274196573  | 56.89999771 | 16.92763 | 57   | 32.15891 | 57.1 | 54.39241 | 57.1 | 100.7061 | 56.8 | 9.145877 | 56.9 | 16.77731 | 57   | 32.12543 | 57.1 | 53.2915  | 57.1 | 95.10423 |
| 56.90000153 | 9.276265214  | 57.00000381 | 16.93704 | 57.1 | 32.17589 | 57.2 | 54.41742 | 57.2 | 100.7628 | 56.9 | 9.15187  | 57   | 16.78686 | 57.1 | 32.14038 | 57.2 | 53.30651 | 57.2 | 95.11246 |
| 57          | 9.283219792  | 57.10000229 | 16.94703 | 57.2 | 32.19692 | 57.3 | 54.44124 | 57.3 | 100.8122 | 57   | 9.157854 | 57.1 | 16.79664 | 57.2 | 32.15529 | 57.3 | 53.32145 | 57.3 | 95.12061 |
| 57.09999847 | 9.286661583  | 57.20000076 | 16.9565  | 57.3 | 32.21365 | 57.4 | 54.46995 | 57.4 | 100.8636 | 57.1 | 9.163831 | 57.2 | 16.80592 | 57.3 | 32.17016 | 57.4 | 53.33632 | 57.4 | 95.12868 |
| 57.19999695 | 9.298022344  | 57.29999924 | 16.96409 | 57.4 | 32.23372 | 57.5 | 54.49554 | 57.5 | 100.9098 | 57.2 | 9.169801 | 57.3 | 16.81542 | 57.4 | 32.185   | 57.5 | 53.35111 | 57.5 | 95.13667 |
| 57.29999542 | 9.297420126  | 57.39999771 | 16.97656 | 57.5 | 32.25565 | 57.6 | 54.52224 | 57.6 | 100.9674 | 57.3 | 9.175764 | 57.4 | 16.82491 | 57.5 | 32.1998  | 57.6 | 53.36583 | 57.6 | 95.14458 |
| 57.40000153 | 9.304202595  | 57.50000381 | 16.98753 | 57.6 | 32.27446 | 57.7 | 54.55268 | 57.7 | 101.0107 | 57.4 | 9.18172  | 57.5 | 16.83438 | 57.6 | 32.21456 | 57.7 | 53.38047 | 57.7 | 95.1524  |
| 57.5        | 9.312552926  | 57.60000229 | 16.99776 | 57.7 | 32.28099 | 57.8 | 54.5901  | 57.8 | 101.0778 | 57.5 | 9.187668 | 57.6 | 16.84383 | 57.7 | 32.22927 | 57.8 | 53.39504 | 57.8 | 95.16015 |
| 57.59999847 | 9.321283604  | 57.70000076 | 17.00954 | 57.8 | 32.29662 | 57.9 | 54.62026 | 57.9 | 101.1325 | 57.6 | 9.193609 | 57.7 | 16.85327 | 57.8 | 32.24397 | 57.9 | 53.40954 | 57.9 | 95.16782 |
| 57.69999695 | 9.325690738  | 57.79999924 | 17.02265 | 57.9 | 32.30781 | 58   | 54.64734 | 58   | 101.1856 | 57.7 | 9.199543 | 57.8 | 16.86269 | 57.9 | 32.25862 | 58   | 53.42397 | 58   | 95.17541 |
| 57.79999542 | 9.334836504  | 57.89999771 | 17.02802 | 58   | 32.31458 | 58.1 | 54.67765 | 58.1 | 101.2463 | 57.8 | 9.20547  | 57.9 | 16.87209 | 58   | 32.27324 | 58.1 | 53.43833 | 58.1 | 95.18292 |
| 57.90000153 | 9.336415915  | 58.00000381 | 17.03835 | 58.1 | 32.32673 | 58.2 | 54.69622 | 58.2 | 101.2837 | 57.9 | 9.21139  | 58   | 16.88148 | 58.1 | 32.28781 | 58.2 | 53.45261 | 58.2 | 95.19036 |
| 58          | 9.34289138   | 58.10000229 | 17.0497  | 58.2 | 32.33834 | 58.3 | 54.72018 | 58.3 | 101.3344 | 58   | 9.217302 | 58.1 | 16.89085 | 58.2 | 32.30235 | 58.3 | 53.46682 | 58.3 |          |

|             |             |             |        |          |         |      |         |      |         |      |          |      |          |      |          |      |          |      |          |
|-------------|-------------|-------------|--------|----------|---------|------|---------|------|---------|------|----------|------|----------|------|----------|------|----------|------|----------|
| 64.40000153 | 5.017400849 | 64.5        | 8.6998 | 64.60001 | 16.2544 | 64.7 | 24.8049 | 64.7 | 44.5597 | 64.4 | 4.772358 | 64.5 | 8.579754 | 64.6 | 15.6756  | 64.7 | 25.91411 | 64.7 | 44.12986 |
| 64.5        | 5.018000048 | 64.6000061  | 8.6699 | 64.7     | 16.1841 | 64.8 | 24.6486 | 64.8 | 44.295  | 64.5 | 4.769098 | 64.6 | 8.566795 | 64.7 | 15.6468  | 64.8 | 25.85013 | 64.8 | 44.00738 |
| 64.59999847 | 4.98078915  | 64.6999965  | 8.6254 | 64.8     | 16.087  | 64.9 | 24.5306 | 64.9 | 44.0498 | 64.6 | 4.761466 | 64.7 | 8.553858 | 64.8 | 15.61807 | 64.9 | 25.78642 | 64.9 | 43.88567 |
| 64.69999695 | 4.983099994 | 64.80000305 | 8.5794 | 64.89999 | 16.0157 | 65   | 24.4063 | 65   | 43.801  | 64.7 | 4.756029 | 64.8 | 8.540944 | 64.9 | 15.5894  | 65   | 25.72298 | 65   | 43.76476 |
| 64.79999542 | 4.951400189 | 64.8999939  | 8.5367 | 65       | 15.9331 | 65.1 | 24.2839 | 65.1 | 43.5634 | 64.8 | 4.7506   | 64.9 | 8.52805  | 65   | 15.56081 | 65.1 | 25.6598  | 65.1 | 43.64461 |
| 64.90000153 | 4.921400723 | 65          | 8.4857 | 65.10001 | 15.8788 | 65.2 | 24.1572 | 65.2 | 43.3187 | 64.9 | 4.745176 | 65   | 8.51518  | 65.1 | 15.53229 | 65.2 | 25.59688 | 65.2 | 43.52523 |
| 65          | 4.906299949 | 65.1000061  | 8.45   | 65.2     | 15.806  | 65.3 | 24.0583 | 65.3 | 43.0812 | 65   | 4.73976  | 65.1 | 8.502333 | 65.2 | 15.50383 | 65.3 | 25.5422  | 65.3 | 43.40659 |
| 65.09999847 | 4.875698667 | 65.1999965  | 8.4113 | 65.3     | 15.724  | 65.4 | 23.9465 | 65.4 | 42.8506 | 65.1 | 4.73435  | 65.2 | 8.489507 | 65.3 | 15.47544 | 65.4 | 25.47182 | 65.4 | 43.28868 |
| 65.19999695 | 4.858300001 | 65.30000305 | 8.37   | 65.39999 | 15.665  | 65.5 | 23.8287 | 65.5 | 42.6275 | 65.2 | 4.728946 | 65.3 | 8.476703 | 65.4 | 15.44712 | 65.5 | 25.40967 | 65.5 | 43.17152 |
| 65.29999542 | 4.843699006 | 65.3999939  | 8.3366 | 65.5     | 15.5961 | 65.6 | 23.7088 | 65.6 | 42.3943 | 65.3 | 4.723549 | 65.4 | 8.463921 | 65.5 | 15.41887 | 65.6 | 25.34778 | 65.6 | 43.05507 |
| 65.40000153 | 4.828800813 | 65.5        | 8.288  | 65.60001 | 15.5201 | 65.7 | 23.5827 | 65.7 | 42.1781 | 65.4 | 4.718158 | 65.5 | 8.451161 | 65.6 | 15.39069 | 65.7 | 25.28614 | 65.7 | 42.93933 |
| 65.5        | 4.806600015 | 65.6000061  | 8.2448 | 65.7     | 15.4671 | 65.8 | 23.4724 | 65.8 | 41.9749 | 65.5 | 4.712774 | 65.6 | 8.438423 | 65.7 | 15.36257 | 65.8 | 25.22476 | 65.8 | 42.82429 |
| 65.59999847 | 4.806699959 | 65.6999965  | 8.2118 | 65.8     | 15.4081 | 65.9 | 23.3728 | 65.9 | 41.7653 | 65.6 | 4.707397 | 65.7 | 8.425708 | 65.8 | 15.33452 | 65.9 | 25.16361 | 65.9 | 42.70993 |
| 65.69999695 | 4.764499997 | 65.80000305 | 8.187  | 65.89999 | 15.3514 | 66   | 23.2578 | 66   | 41.5449 | 65.7 | 4.702026 | 65.8 | 8.413014 | 65.9 | 15.30654 | 66   | 25.10272 | 66   | 42.59627 |
| 65.79999542 | 4.749498876 | 65.8999939  | 8.1824 | 66       | 15.2647 | 66.1 | 23.1525 | 66.1 | 41.3465 | 65.8 | 4.696662 | 65.9 | 8.40034  | 66   | 15.27862 | 66.1 | 25.04207 | 66.1 | 42.48328 |
| 65.90000153 | 4.737400004 | 66          | 8.1333 | 66.10001 | 15.1991 | 66.2 | 23.0377 | 66.2 | 41.1476 | 65.9 | 4.691303 | 66   | 8.38769  | 66.1 | 15.25077 | 66.2 | 24.98166 | 66.2 | 42.37096 |
| 66          | 4.705000018 | 66.1000061  | 8.109  | 66.2     | 15.1346 | 66.3 | 22.928  | 66.3 | 40.9608 | 66   | 4.685952 | 66.1 | 8.375061 | 66.2 | 15.22299 | 66.3 | 24.9215  | 66.3 | 42.2593  |
| 66.09999847 | 4.684698914 | 66.1999965  | 8.0645 | 66.3     | 15.0702 | 66.4 | 22.8359 | 66.4 | 40.7727 | 66.1 | 4.680607 | 66.2 | 8.362454 | 66.3 | 15.19527 | 66.4 | 24.86157 | 66.4 | 42.14828 |
| 66.19999695 | 4.653399997 | 66.30000305 | 8.0361 | 66.39999 | 15.0104 | 66.5 | 22.7343 | 66.5 | 40.586  | 66.2 | 4.675268 | 66.3 | 8.349868 | 66.4 | 15.16762 | 66.5 | 24.80188 | 66.5 | 42.03791 |
| 66.29999542 | 4.646099114 | 66.3999939  | 8.012  | 66.5     | 14.9551 | 66.6 | 22.645  | 66.6 | 40.423  | 66.3 | 4.669936 | 66.4 | 8.337303 | 66.5 | 15.14004 | 66.6 | 24.74243 | 66.6 | 41.92817 |
| 66.40000153 | 4.631900888 | 66.5        | 7.9833 | 66.60001 | 14.8952 | 66.7 | 22.5565 | 66.7 | 40.2524 | 66.4 | 4.66461  | 66.5 | 8.32476  | 66.6 | 15.11251 | 66.7 | 24.68322 | 66.7 | 41.81906 |
| 66.5        | 4.616800054 | 66.6000061  | 7.9641 | 66.7     | 14.8405 | 66.8 | 22.4642 | 66.8 | 40.0808 | 66.5 | 4.659291 | 66.6 | 8.312239 | 66.7 | 15.08506 | 66.8 | 24.62423 | 66.8 | 41.71057 |
| 66.59999847 | 4.612098469 | 66.6999965  | 7.9318 | 66.8     | 14.785  | 66.9 | 22.3874 | 66.9 | 39.9173 | 66.6 | 4.653978 | 66.7 | 8.299739 | 66.8 | 15.05767 | 66.9 | 24.56548 | 66.9 | 41.60269 |
| 66.69999695 | 4.599200007 | 66.80000305 | 7.9096 | 66.89999 | 14.7234 | 67   | 22.31   | 67   | 39.7634 | 66.7 | 4.648671 | 66.8 | 8.287261 | 66.9 | 15.03034 | 67   | 24.50696 | 67   | 41.49541 |
| 66.79999542 | 4.575990949 | 66.8999939  | 7.8902 | 67       | 14.6769 | 67.1 | 22.2504 | 67.1 | 39.5933 | 66.8 | 4.643371 | 66.9 | 8.274803 | 67   | 15.00308 | 67.1 | 24.44866 | 67.1 | 41.38874 |
| 66.90000153 | 4.565901563 | 67          | 7.8784 | 67.10001 | 14.6114 | 67.2 | 22.176  | 67.2 | 39.4373 | 66.9 | 4.638077 | 67   | 8.262367 | 67.1 | 14.97588 | 67.2 | 24.39059 | 67.2 | 41.28266 |
| 67          | 4.563500011 | 67.1000061  | 7.844  | 67.2     | 14.5541 | 67.3 | 22.0958 | 67.3 | 39.2645 | 67   | 4.63279  | 67.1 | 8.249952 | 67.2 | 14.94875 | 67.3 | 24.33275 | 67.3 | 41.17716 |
| 67.09999847 | 4.54559883  | 67.1999965  | 7.8217 | 67.3     | 14.4896 | 67.4 | 22.0229 | 67.4 | 39.0965 | 67.1 | 4.627509 | 67.2 | 8.237559 | 67.3 | 14.92168 | 67.4 | 24.27513 | 67.4 | 41.07223 |
| 67.19999695 | 4.537499971 | 67.30000305 | 7.799  | 67.39999 | 14.4422 | 67.5 | 21.9496 | 67.5 | 38.9401 | 67.2 | 4.622234 | 67.3 | 8.225186 | 67.4 | 14.89467 | 67.5 | 24.21773 | 67.5 | 40.96788 |
| 67.29999542 | 4.521099461 | 67.3999939  | 7.7804 | 67.5     | 14.3921 | 67.6 | 21.8745 | 67.6 | 38.7843 | 67.3 | 4.616966 | 67.4 | 8.212834 | 67.5 | 14.86772 | 67.6 | 24.16055 | 67.6 | 40.8641  |
| 67.40000153 | 4.512600881 | 67.5        | 7.7692 | 67.60001 | 14.3401 | 67.7 | 21.7879 | 67.7 | 38.6239 | 67.4 | 4.611704 | 67.5 | 8.200504 | 67.6 | 14.84084 | 67.7 | 24.1036  | 67.7 | 40.76087 |
| 67.5        | 4.500399998 | 67.6000061  | 7.744  | 67.7     | 14.2853 | 67.8 | 21.7083 | 67.8 | 38.472  | 67.5 | 4.606449 | 67.6 | 8.188195 | 67.7 | 14.81403 | 67.8 | 24.04686 | 67.8 | 40.65602 |
| 67.59999847 | 4.492499405 | 67.6999965  | 7.7105 | 67.8     | 14.2351 | 67.9 | 21.6251 | 67.9 | 38.3232 | 67.6 | 4.601199 | 67.7 | 8.175907 | 67.8 | 14.78727 | 67.9 | 23.99033 | 67.9 | 40.55827 |
| 67.69999695 | 4.471000023 | 67.80000305 | 7.6858 | 67.89999 | 14.1823 | 68   | 21.5397 | 68   | 38.1757 | 67.7 | 4.595957 | 67.8 | 8.163639 | 67.9 | 14.76058 | 68   | 23.93402 | 68   | 40.45448 |
| 67.79999542 | 4.465099173 | 67.8999939  | 7.6513 | 68       | 14.1242 | 68.1 | 21.4541 | 68.1 | 38.0254 | 67.8 | 4.59072  | 67.9 | 8.151392 | 68   | 14.73395 | 68.1 | 23.87792 | 68.1 | 40.35343 |
| 67.90000153 | 4.447200431 | 68          | 7.6181 | 68.10001 | 14.0683 | 68.2 | 21.3736 | 68.2 | 37.8797 | 67.9 | 4.58549  | 68   | 8.139166 | 68.1 | 14.70738 | 68.2 | 23.82204 | 68.2 | 40.25291 |
| 68.09999847 | 4.41269966  | 68.1999965  | 7.5858 | 68.3     | 13.9654 | 68.4 | 21.2241 | 68.4 | 37.5891 | 68.1 | 4.575048 | 68.2 | 8.114777 | 68.3 | 14.65443 | 68.4 | 23.71089 | 68.4 | 40.15342 |
| 68.19999695 | 4.399900056 | 68.30000305 | 7.5367 | 68.39999 | 13.9144 | 68.5 | 21.1564 | 68.5 | 37.4518 | 68.2 | 4.569837 | 68.3 | 8.102614 | 68.4 | 14.62804 | 68.5 | 23.65563 | 68.5 | 39.95445 |
| 68.29999542 | 4.38019535  | 68.3999939  | 7.5174 | 68.5     | 13.8736 | 68.6 | 21.0851 | 68.6 | 37.323  | 68.3 | 4.564632 | 68.4 | 8.09047  | 68.5 | 14.60172 | 68.6 | 23.60058 | 68.6 | 39.85599 |
| 68.40000153 | 4.366200804 | 68.5        | 7.4988 | 68.60001 | 13.8232 | 68.7 | 21.014  | 68.7 | 37.2121 | 68.4 | 4.559433 | 68.5 | 8.078348 | 68.6 | 14.57546 | 68.7 | 23.54573 | 68.7 | 39.75803 |
| 68.5        | 4.355799973 | 68.6000061  | 7.4814 | 68.8     | 13.7748 | 68.8 | 20.9435 | 68.8 | 37.0906 | 68.5 | 4.55424  | 68.6 | 8.066246 | 68.7 | 14.54926 | 68.8 | 23.49108 | 68.8 | 39.66057 |
| 68.59999847 | 4.338199338 | 68.6999965  | 7.4606 | 68.9     | 13.7294 | 68.9 | 20.8724 | 68.9 | 36.9709 | 68.6 | 4.549054 | 68.7 | 8.054165 | 68.8 | 14.52312 | 68.9 | 23.43664 | 68.9 | 39.56359 |
| 68.69999695 | 4.31899996  | 68.80000305 | 7.4422 | 68.89999 | 13.6814 | 69   | 20.807  | 69   | 36.8507 | 68.7 | 4.543874 | 68.8 | 8.042105 | 68.9 | 14.49703 | 69   | 23.3824  | 69   | 39.46711 |
| 68.79999542 | 4.302299205 | 68.8999939  | 7.4186 | 69       | 13.6466 | 69.1 | 20.7356 | 69.1 | 36.7333 | 68.8 | 4.5387   | 68.9 | 8.030064 | 69   | 14.47101 | 69.1 | 23.32835 | 69.1 | 39.3711  |
| 68.90000153 | 4.287300821 | 69          | 7.3983 | 69.10001 | 13.6085 | 69.2 | 20.6611 | 69.2 | 36.6143 | 68.9 | 4.533532 | 69   | 8.018044 | 69.1 | 14.44505 | 69.2 | 23.27451 | 69.2 | 39.27557 |
| 69          | 4.275799988 | 69.1000061  | 7.3818 | 69.2     | 13.5648 | 69.3 | 20.5883 | 69.3 | 36.4889 | 69   | 4.528371 | 69.1 | 8.006044 | 69.2 | 14.41915 | 69.3 | 23.22086 | 69.3 | 39.18052 |
| 69.09999847 | 4.259899137 | 69.1999965  | 7.3596 | 69.3     | 13.5182 | 69.4 | 20.5235 | 69.4 | 36.3643 | 69.1 | 4.523215 | 69.2 | 7.994065 | 69.3 | 14.39331 | 69.4 | 23.16741 | 69.4 | 39.08592 |
| 69.19999695 | 4.243599955 | 69.30000305 | 7.3327 | 69.39999 | 13.4739 | 69.5 | 20.4604 | 69.5 | 36.2476 | 69.2 | 4.518066 | 69.3 | 7.982106 | 69.4 | 14.36753 | 69.5 | 23.11415 | 69.5 | 38.99118 |
| 69.29999542 | 4.229199556 | 69.3999939  | 7.3055 | 69.5     | 13.4289 | 69.6 | 20.3909 | 69.6 | 36.1286 | 69.3 | 4.512924 | 69.4 | 7.970167 | 69.5 | 14.34181 | 69.6 | 23.06109 | 69.6 | 38.89813 |
| 69.40000153 | 4.212700466 | 69.5        | 7.2814 | 69.60001 | 13.3907 | 69.7 | 20.3282 | 69.7 | 36.0112 | 69.4 | 4.507787 | 69.5 | 7.958248 | 69.6 | 14.31614 | 69.7 | 23.00822 | 69.7 | 38.80492 |
| 69.5        | 4.197099981 | 69.6000061  | 7.261  | 69.7     | 13.3555 | 69.8 | 20.2613 | 69.8 | 35.8962 | 69.5 | 4.502656 | 69.6 | 7.94635  | 69.7 | 14.29054 | 69.8 | 22.95554 | 69.8 | 38.71216 |
| 69.59999847 | 4.186699098 | 69.6999965  | 7.2388 | 69.8     | 13.3097 | 69.9 | 20.2047 | 69.9 | 35.7808 | 69.6 | 4.497532 | 69.7 | 7.934472 | 69.8 | 14.26499 | 69.9 | 22.90304 | 69.9 | 38.61983 |
| 69.69999695 | 4.171999997 | 69.80000305 | 7.2152 | 69.89999 | 13.268  | 70   | 20.1517 | 70   | 35.6694 | 69.7 | 4.492414 | 69.8 | 7.922614 | 69.9 | 14.2395  | 70   | 22.85074 | 70   | 38.52795 |
| 69.79999542 | 4.165399446 | 69.89999    |        |          |         |      |         |      |         |      |          |      |          |      |          |      |          |      |          |

|             |             |            |        |          |         |      |         |      |         |      |          |      |          |      |          |      |          |      |          |
|-------------|-------------|------------|--------|----------|---------|------|---------|------|---------|------|----------|------|----------|------|----------|------|----------|------|----------|
| 75.90000153 | 3.628400637 | 76         | 6.258  | 76.10001 | 11.2539 | 76.2 | 17.1733 | 76.2 | 29.9871 | 75.9 | 4.18678  | 76   | 7.224899 | 76.1 | 12.76583 | 76.2 | 19.93372 | 76.2 | 33.5501  |
| 76          | 3.621000021 | 76.100061  | 6.2475 | 76.2     | 11.2251 | 76.3 | 17.1338 | 76.3 | 29.9154 | 76   | 4.182034 | 76.1 | 7.214225 | 76.2 | 12.74367 | 76.3 | 18.91314 | 76.3 | 33.47956 |
| 76.09999847 | 3.61299948  | 76.1999695 | 6.2331 | 76.3     | 11.1993 | 76.4 | 17.0915 | 76.4 | 29.8389 | 76.1 | 4.177294 | 76.2 | 7.203568 | 76.3 | 12.72155 | 76.4 | 18.84908 | 76.4 | 33.40927 |
| 76.19999695 | 3.604299989 | 76.3000035 | 6.2206 | 76.39999 | 11.1734 | 76.5 | 17.0503 | 76.5 | 29.7651 | 76.2 | 4.172559 | 76.3 | 7.192929 | 76.4 | 12.69948 | 76.5 | 18.80696 | 76.5 | 33.33926 |
| 76.29999542 | 3.598799518 | 76.3999939 | 6.2073 | 76.5     | 11.145  | 76.6 | 17.0129 | 76.6 | 29.7011 | 76.3 | 4.16783  | 76.4 | 7.182307 | 76.5 | 12.67747 | 76.6 | 18.76496 | 76.6 | 33.2695  |
| 76.40000153 | 3.590500569 | 76.5       | 6.1957 | 76.60001 | 11.1254 | 76.7 | 16.977  | 76.7 | 29.6353 | 76.4 | 4.163106 | 76.5 | 7.171703 | 76.6 | 12.6555  | 76.7 | 18.7231  | 76.7 | 33.2     |
| 76.5        | 3.586300009 | 76.600061  | 6.188  | 76.7     | 11.1045 | 76.8 | 16.942  | 76.8 | 29.57   | 76.5 | 4.158388 | 76.6 | 7.161117 | 76.7 | 12.63357 | 76.8 | 18.68137 | 76.8 | 33.13075 |
| 76.59999847 | 3.583392271 | 76.6999695 | 6.1736 | 76.8     | 11.0867 | 76.9 | 16.9056 | 76.9 | 29.5053 | 76.6 | 4.153676 | 76.7 | 7.150548 | 76.8 | 12.6117  | 76.9 | 18.63976 | 76.9 | 33.06175 |
| 76.69999695 | 3.578999986 | 76.8000035 | 6.1621 | 76.89999 | 11.0681 | 77   | 16.8683 | 77   | 29.4352 | 76.7 | 4.148969 | 76.8 | 7.139996 | 76.9 | 12.5896  | 77   | 18.59828 | 77   | 32.99301 |
| 76.79999542 | 3.577699343 | 76.8999939 | 6.1522 | 77       | 11.0439 | 77.1 | 16.8261 | 77.1 | 29.3622 | 76.8 | 4.144268 | 76.9 | 7.129461 | 77   | 12.56808 | 77.1 | 18.55693 | 77.1 | 32.92451 |
| 76.90000153 | 3.573200505 | 77         | 6.1413 | 77.10001 | 11.0179 | 77.2 | 16.7847 | 77.2 | 29.2912 | 76.9 | 4.139572 | 77   | 7.118944 | 77.1 | 12.54635 | 77.2 | 18.51571 | 77.2 | 32.85627 |
| 77          | 3.5648      | 77.100061  | 6.1249 | 77.2     | 10.9919 | 77.3 | 16.7542 | 77.3 | 29.2283 | 77   | 4.134882 | 77.1 | 7.110844 | 77.2 | 12.52466 | 77.3 | 18.47461 | 77.3 | 32.78827 |
| 77.09999847 | 3.554896621 | 77.1999695 | 6.1119 | 77.3     | 10.9687 | 77.4 | 16.7191 | 77.4 | 29.1695 | 77.1 | 4.130198 | 77.2 | 7.097962 | 77.3 | 12.50301 | 77.4 | 18.43363 | 77.4 | 32.72051 |
| 77.19999695 | 3.54729997  | 77.3000035 | 6.1021 | 77.39999 | 10.9458 | 77.5 | 16.6896 | 77.5 | 29.1104 | 77.2 | 4.125519 | 77.3 | 7.087497 | 77.4 | 12.48141 | 77.5 | 18.39278 | 77.5 | 32.653   |
| 77.29999542 | 3.539099443 | 77.3999939 | 6.0913 | 77.5     | 10.9257 | 77.6 | 16.6566 | 77.6 | 29.0449 | 77.3 | 4.120846 | 77.4 | 7.077048 | 77.5 | 12.45986 | 77.6 | 18.35206 | 77.6 | 32.58573 |
| 77.40000153 | 3.533800668 | 77.5       | 6.0799 | 77.60001 | 10.9036 | 77.7 | 16.6216 | 77.7 | 28.9795 | 77.4 | 4.116178 | 77.5 | 7.066617 | 77.6 | 12.43836 | 77.7 | 18.31146 | 77.7 | 32.5187  |
| 77.5        | 3.530900016 | 77.600061  | 6.0681 | 77.7     | 10.8713 | 77.8 | 16.586  | 77.8 | 28.9036 | 77.5 | 4.111516 | 77.6 | 7.056204 | 77.7 | 12.4169  | 77.8 | 18.27098 | 77.8 | 32.45191 |
| 77.59999847 | 3.524799601 | 77.6999695 | 6.0553 | 77.8     | 10.8452 | 77.9 | 16.5491 | 77.9 | 28.8289 | 77.6 | 4.10686  | 77.7 | 7.045807 | 77.8 | 12.39548 | 77.9 | 18.23062 | 77.9 | 32.38535 |
| 77.69999695 | 3.5141      | 77.8000035 | 6.0401 | 77.89999 | 10.8199 | 78   | 16.521  | 78   | 28.7574 | 77.7 | 4.102209 | 77.8 | 7.035428 | 77.9 | 12.37411 | 78   | 18.19038 | 78   | 32.31903 |
| 77.79999542 | 3.508199621 | 77.8999939 | 6.0297 | 78       | 10.7973 | 78.1 | 16.4852 | 78.1 | 28.6873 | 77.8 | 4.097563 | 77.9 | 7.025064 | 78   | 12.35279 | 78.1 | 18.15027 | 78.1 | 32.25295 |
| 77.90000153 | 3.500200467 | 78         | 6.0199 | 78.10001 | 10.7726 | 78.2 | 16.4554 | 78.2 | 28.6239 | 77.9 | 4.092923 | 78   | 7.014719 | 78.1 | 12.33151 | 78.2 | 18.11028 | 78.2 | 32.18709 |
| 78          | 3.494100022 | 78.100061  | 6.0058 | 78.2     | 10.751  | 78.3 | 16.4211 | 78.3 | 28.5603 | 78   | 4.088289 | 78.1 | 7.00439  | 78.2 | 12.31028 | 78.3 | 18.07041 | 78.3 | 32.12147 |
| 78.09999847 | 3.487399762 | 78.1999695 | 5.9966 | 78.3     | 10.7282 | 78.4 | 16.3806 | 78.4 | 28.4961 | 78.1 | 4.08366  | 78.2 | 6.994079 | 78.3 | 12.28909 | 78.4 | 18.03065 | 78.4 | 32.05607 |
| 78.19999695 | 3.484899977 | 78.3000035 | 5.9858 | 78.39999 | 10.702  | 78.5 | 16.3453 | 78.5 | 28.4272 | 78.2 | 4.079037 | 78.3 | 6.983784 | 78.4 | 12.26795 | 78.5 | 18.99101 | 78.5 | 31.99091 |
| 78.29999542 | 3.479799391 | 78.3999939 | 5.9731 | 78.5     | 10.6788 | 78.6 | 16.3102 | 78.6 | 28.3665 | 78.3 | 4.074419 | 78.4 | 6.973505 | 78.5 | 12.24685 | 78.6 | 18.9515  | 78.6 | 31.92597 |
| 78.40000153 | 3.472500253 | 78.5       | 5.9612 | 78.60001 | 10.6561 | 78.7 | 16.2777 | 78.7 | 28.3089 | 78.4 | 4.069806 | 78.5 | 6.963244 | 78.6 | 12.2258  | 78.7 | 18.9121  | 78.7 | 31.86126 |
| 78.5        | 3.463100026 | 78.600061  | 5.9476 | 78.7     | 10.6357 | 78.8 | 16.2427 | 78.8 | 28.2481 | 78.5 | 4.065199 | 78.6 | 6.953    | 78.7 | 12.20479 | 78.8 | 18.87281 | 78.8 | 31.79677 |
| 78.59999847 | 3.457999542 | 78.6999695 | 5.9365 | 78.8     | 10.6122 | 78.9 | 16.2162 | 78.9 | 28.1879 | 78.6 | 4.060598 | 78.7 | 6.942772 | 78.8 | 12.18383 | 78.9 | 18.83365 | 78.9 | 31.73249 |
| 78.69999695 | 3.456099982 | 78.8000035 | 5.9262 | 78.89999 | 10.5934 | 79   | 16.1859 | 79   | 28.1198 | 78.7 | 4.056002 | 78.8 | 6.932561 | 78.9 | 12.16291 | 79   | 18.7946  | 79   | 31.66844 |
| 78.79999542 | 3.454799431 | 78.8999939 | 5.9205 | 79       | 10.5725 | 79.1 | 16.152  | 79.1 | 28.0589 | 78.8 | 4.051411 | 78.9 | 6.922366 | 79   | 12.14203 | 79.1 | 18.75566 | 79.1 | 31.60462 |
| 78.90000153 | 3.453400488 | 79         | 5.9088 | 79.10001 | 10.5518 | 79.2 | 16.1177 | 79.2 | 27.998  | 78.9 | 4.046826 | 79   | 6.912189 | 79.1 | 12.1212  | 79.2 | 18.71684 | 79.2 | 31.54101 |
| 79          | 3.44790001  | 79.100061  | 5.8993 | 79.2     | 10.5263 | 79.3 | 16.0813 | 79.3 | 27.9327 | 79   | 4.042246 | 79.1 | 6.902028 | 79.2 | 12.10041 | 79.3 | 18.67814 | 79.3 | 31.47141 |
| 79.09999847 | 3.450299433 | 79.1999695 | 5.8897 | 79.3     | 10.5029 | 79.4 | 16.0442 | 79.4 | 27.8665 | 79.1 | 4.037672 | 79.2 | 6.891884 | 79.3 | 12.07967 | 79.4 | 18.63954 | 79.4 | 31.41443 |
| 79.19999695 | 3.442499995 | 79.3000035 | 5.8735 | 79.39999 | 10.4818 | 79.5 | 16.0144 | 79.5 | 27.8061 | 79.2 | 4.033104 | 79.3 | 6.881756 | 79.4 | 12.05896 | 79.5 | 18.60106 | 79.5 | 31.35146 |
| 79.29999542 | 3.431399732 | 79.3999939 | 5.8616 | 79.5     | 10.4584 | 79.6 | 15.9821 | 79.6 | 27.7478 | 79.3 | 4.02854  | 79.4 | 6.871644 | 79.5 | 12.03831 | 79.6 | 18.5627  | 79.6 | 31.28871 |
| 79.40000153 | 3.421600528 | 79.5       | 5.8525 | 79.60001 | 10.4384 | 79.7 | 15.9481 | 79.7 | 27.6924 | 79.4 | 4.023982 | 79.5 | 6.86155  | 79.6 | 12.01769 | 79.7 | 18.52444 | 79.7 | 31.22617 |
| 79.5        | 3.415400014 | 79.600061  | 5.8395 | 79.7     | 10.4195 | 79.8 | 15.9175 | 79.8 | 27.6379 | 79.5 | 4.01943  | 79.6 | 6.851471 | 79.7 | 11.99712 | 79.8 | 18.4863  | 79.8 | 31.16384 |
| 79.59999847 | 3.410099618 | 79.6999695 | 5.8284 | 79.8     | 10.3959 | 79.9 | 15.8845 | 79.9 | 27.577  | 79.6 | 4.014883 | 79.7 | 6.84141  | 79.8 | 11.9766  | 79.9 | 18.44827 | 79.9 | 31.10171 |
| 79.69999695 | 3.406100012 | 79.8000035 | 5.8171 | 79.89999 | 10.3728 | 80   | 15.85   | 80   | 27.5141 | 79.7 | 4.010341 | 79.8 | 6.831364 | 79.9 | 11.9561  | 80   | 18.41035 | 80   | 31.03979 |
| 79.79999542 | 3.402399481 | 79.8999939 | 5.8061 | 80       | 10.3484 | 80.1 | 15.8203 | 80.1 | 27.4512 | 79.8 | 4.005805 | 79.9 | 6.821334 | 80   | 11.93567 | 80.1 | 18.37254 | 80.1 | 30.97809 |
| 79.90000153 | 3.392900238 | 80         | 5.7942 | 80.10001 | 10.3297 | 80.2 | 15.788  | 80.2 | 27.3922 | 79.9 | 4.001274 | 80   | 6.811322 | 80.1 | 11.91527 | 80.2 | 18.33484 | 80.2 | 30.91658 |
| 80          | 3.38760001  | 80.100061  | 5.7871 | 80.2     | 10.3128 | 80.3 | 15.7606 | 80.3 | 27.3358 | 80   | 3.996748 | 80.1 | 6.801325 | 80.2 | 11.89491 | 80.3 | 18.29274 | 80.3 | 30.85528 |
| 80.09999847 | 3.379799496 | 80.1999695 | 5.7788 | 80.3     | 10.296  | 80.4 | 15.728  | 80.4 | 27.2824 | 80.1 | 3.992228 | 80.2 | 6.791345 | 80.3 | 11.8746  | 80.4 | 18.25976 | 80.4 | 30.79418 |
| 80.19999695 | 3.375399989 | 80.3000035 | 5.7696 | 80.39999 | 10.2758 | 80.5 | 15.694  | 80.5 | 27.2257 | 80.2 | 3.987714 | 80.3 | 6.781381 | 80.4 | 11.85433 | 80.5 | 18.22238 | 80.5 | 30.73238 |
| 80.29999542 | 3.371099419 | 80.3999939 | 5.7561 | 80.5     | 10.2497 | 80.6 | 15.6621 | 80.6 | 27.1653 | 80.3 | 3.983204 | 80.4 | 6.771343 | 80.5 | 11.8341  | 80.6 | 18.18512 | 80.6 | 30.67259 |
| 80.40000153 | 3.367300342 | 80.5       | 5.7468 | 80.60001 | 10.2268 | 80.7 | 15.6309 | 80.7 | 27.1058 | 80.4 | 3.9787   | 80.5 | 6.761501 | 80.6 | 11.81391 | 80.7 | 18.14796 | 80.7 | 30.61209 |
| 80.5        | 3.361799986 | 80.600061  | 5.738  | 80.7     | 10.2038 | 80.8 | 15.6017 | 80.8 | 27.0514 | 80.5 | 3.974201 | 80.6 | 6.751586 | 80.7 | 11.79376 | 80.8 | 18.1109  | 80.8 | 30.55179 |
| 80.59999847 | 3.355999781 | 80.6999695 | 5.7271 | 80.8     | 10.1848 | 80.9 | 15.5699 | 80.9 | 26.9955 | 80.6 | 3.969708 | 80.7 | 6.741687 | 80.8 | 11.77366 | 80.9 | 18.07395 | 80.9 | 30.49169 |
| 80.69999695 | 3.351600012 | 80.8000035 | 5.7157 | 80.89999 | 10.1643 | 81   | 15.543  | 81   | 26.9348 | 80.7 | 3.96522  | 80.8 | 6.731804 | 80.9 | 11.7536  | 81   | 18.03711 | 81   | 30.43178 |
| 80.79999542 | 3.347099521 | 80.8999939 | 5.7039 | 81       | 10.1421 | 81.1 | 15.5117 | 81.1 | 26.8736 | 80.8 | 3.960737 | 80.9 | 6.721936 | 81   | 11.73358 | 81.1 | 18.00037 | 81.1 | 30.37207 |
| 80.90000153 | 3.340100447 | 81         | 5.6942 | 81.10001 | 10.1232 | 81.2 | 15.4808 | 81.2 | 26.813  | 80.9 | 3.95626  | 81   | 6.712085 | 81.1 | 11.7136  | 81.2 | 17.96374 | 81.2 | 30.31255 |
| 81          | 3.334900008 | 81.100061  | 5.6864 | 81.2     | 10.105  | 81.3 | 15.4506 | 81.3 | 26.7509 | 81   | 3.951787 | 81.1 | 6.702249 | 81.2 | 11.69366 | 81.3 | 17.92722 | 81.3 | 30.25322 |
| 81.09999847 | 3.332899481 | 81.1999695 | 5.6779 | 81.3     | 10.084  | 81.4 | 15.4209 | 81.4 | 26.7312 | 81.1 | 3.947321 | 81.2 | 6.69243  | 81.3 | 11.67377 | 81.4 | 17.89079 | 81.4 | 30.19408 |
| 81.19999695 | 3.331099997 | 81.3000035 | 5.6694 | 81.39999 | 10.063  | 81.5 | 15.3    |      |         |      |          |      |          |      |          |      |          |      |          |

|             |              |            |          |          |          |          |         |          |         |          |          |          |          |          |          |          |          |          |          |
|-------------|--------------|------------|----------|----------|----------|----------|---------|----------|---------|----------|----------|----------|----------|----------|----------|----------|----------|----------|----------|
| 87.40000153 | 3.040700291  | 87.5       | 5.1583   | 87.60001 | 9.0042   | 87.7     | 13.7984 | 87.7     | 23.6973 | 87.4     | 3.676306 | 87.5     | 6.104683 | 87.6     | 10.49883 | 87.7     | 15.78705 | 87.7     | 26.81158 |
| 87.5        | 3.033999999  | 87.6000061 | 5.158    | 87.7     | 8.9976   | 87.8     | 13.7791 | 87.8     | 23.6536 | 87.5     | 3.672165 | 87.6     | 6.095824 | 87.7     | 10.48135 | 87.8     | 15.75642 | 87.8     | 26.76276 |
| 87.59999847 | 3.037299378  | 87.6999695 | 5.158    | 87.8     | 8.9819   | 87.9     | 13.7571 | 87.9     | 23.6085 | 87.6     | 3.668028 | 87.7     | 6.086979 | 87.8     | 10.46391 | 87.9     | 15.72588 | 87.9     | 26.71406 |
| 87.69999695 | 3.038600001  | 87.8000035 | 5.1501   | 87.89999 | 8.9669   | 88       | 13.7323 | 88       | 23.5693 | 87.7     | 3.663897 | 87.8     | 6.078148 | 87.9     | 10.4465  | 88       | 15.69541 | 88       | 26.66551 |
| 87.79999542 | 3.031599757  | 87.8999939 | 5.1402   | 88       | 8.9558   | 88.1     | 13.7025 | 88.1     | 23.5261 | 87.8     | 3.65977  | 87.9     | 6.069331 | 88.0     | 10.42913 | 88.1     | 15.66503 | 88.1     | 26.61709 |
| 87.90000153 | 3.030700448  | 88         | 5.1296   | 88.10001 | 8.9362   | 88.2     | 13.6833 | 88.2     | 23.4885 | 87.9     | 3.655648 | 88.0     | 6.060528 | 88.1     | 10.4118  | 88.2     | 15.63472 | 88.2     | 26.56881 |
| 88          | 3.027299996  | 88.1000061 | 5.1189   | 88.2     | 8.9232   | 88.3     | 13.6625 | 88.3     | 23.4479 | 87.8     | 3.651531 | 88.1     | 6.051739 | 88.2     | 10.39448 | 88.3     | 15.60449 | 88.3     | 26.52066 |
| 88.09999847 | 3.021999905  | 88.1999695 | 5.1157   | 88.3     | 8.9068   | 88.4     | 13.6436 | 88.4     | 23.4123 | 88.1     | 3.647419 | 88.2     | 6.042965 | 88.3     | 10.37722 | 88.4     | 15.57434 | 88.4     | 26.47264 |
| 88.19999695 | 3.020200004  | 88.3000035 | 5.1046   | 88.39999 | 8.8926   | 88.5     | 13.6207 | 88.5     | 23.3675 | 88.2     | 3.643312 | 88.3     | 6.034204 | 88.4     | 10.35999 | 88.5     | 15.54426 | 88.5     | 26.42475 |
| 88.29999542 | 3.016699746  | 88.3999939 | 5.0919   | 88.5     | 8.8792   | 88.6     | 13.5953 | 88.6     | 23.3236 | 88.3     | 3.639209 | 88.4     | 6.025456 | 88.5     | 10.34279 | 88.6     | 15.51427 | 88.6     | 26.377   |
| 88.40000153 | 3.014002622  | 88.5       | 5.086    | 88.60001 | 8.8616   | 88.7     | 13.5769 | 88.7     | 23.2848 | 88.4     | 3.635111 | 88.5     | 6.016723 | 88.6     | 10.32562 | 88.7     | 15.48435 | 88.7     | 26.32938 |
| 88.5        | 3.010699999  | 88.6000061 | 5.0792   | 88.7     | 8.8451   | 88.8     | 13.5577 | 88.8     | 23.2414 | 88.5     | 3.631019 | 88.6     | 6.008004 | 88.7     | 10.30849 | 88.8     | 15.4545  | 88.8     | 26.28189 |
| 88.59999847 | 3.006699774  | 88.6999695 | 5.0721   | 88.8     | 8.8265   | 88.9     | 13.5368 | 88.9     | 23.2022 | 88.6     | 3.626931 | 88.7     | 5.999299 | 88.8     | 10.29139 | 88.9     | 15.42473 | 88.9     | 26.23452 |
| 88.69999695 | 3.000200001  | 88.8000035 | 5.0633   | 88.89999 | 8.8108   | 89       | 13.5162 | 89       | 23.1615 | 88.7     | 3.622847 | 88.8     | 5.990607 | 88.9     | 10.27432 | 89       | 15.39504 | 89       | 26.18729 |
| 88.79999542 | 2.996799726  | 88.8999939 | 5.0548   | 89       | 8.8004   | 89.1     | 13.4945 | 89.1     | 23.1165 | 88.8     | 3.618769 | 88.9     | 5.981929 | 89       | 10.25729 | 89.1     | 15.36543 | 89.1     | 26.14019 |
| 88.90000153 | 2.993500404  | 89         | 5.0491   | 89.10001 | 8.7852   | 89.2     | 13.4719 | 89.2     | 23.0729 | 88.9     | 3.614695 | 89       | 5.973265 | 89.1     | 10.24029 | 89.2     | 15.33589 | 89.2     | 26.09321 |
| 89          | 2.990899998  | 89.1000061 | 5.042    | 89.2     | 8.7693   | 89.3     | 13.4486 | 89.3     | 23.0325 | 89       | 3.610626 | 89.1     | 5.964614 | 89.2     | 10.22333 | 89.3     | 15.30642 | 89.3     | 26.04636 |
| 89.09999847 | 2.98519981   | 89.1999695 | 5.0339   | 89.3     | 8.7503   | 89.4     | 13.4312 | 89.4     | 22.9906 | 89.1     | 3.606562 | 89.2     | 5.959578 | 89.3     | 10.2064  | 89.4     | 15.27703 | 89.4     | 25.99964 |
| 89.19999695 | 2.981399999  | 89.3000035 | 5.02     | 89.39999 | 8.7393   | 89.5     | 13.4163 | 89.5     | 22.9592 | 89.2     | 3.602503 | 89.3     | 5.947355 | 89.4     | 10.1895  | 89.5     | 15.24771 | 89.5     | 25.95305 |
| 89.29999542 | 2.975299994  | 89.3999939 | 5.0161   | 89.5     | 8.7259   | 89.6     | 13.3951 | 89.6     | 22.9163 | 89.3     | 3.598449 | 89.4     | 5.938745 | 89.5     | 10.17263 | 89.6     | 15.21847 | 89.6     | 25.90658 |
| 89.40000153 | 2.9749000382 | 89.5       | 5.014    | 89.60001 | 8.7093   | 89.7     | 13.3771 | 89.7     | 22.8822 | 89.4     | 3.594398 | 89.5     | 5.930149 | 89.6     | 10.1558  | 89.7     | 15.1893  | 89.7     | 25.86023 |
| 89.5        | 2.970700001  | 89.6000061 | 5.0056   | 89.7     | 8.6988   | 89.8     | 13.3573 | 89.8     | 22.8451 | 89.5     | 3.590354 | 89.6     | 5.921567 | 89.7     | 10.139   | 89.8     | 15.16021 | 89.8     | 25.81402 |
| 89.59999847 | 2.966499788  | 89.6999695 | 4.9999   | 89.8     | 8.6861   | 89.9     | 13.3378 | 89.9     | 22.8036 | 89.6     | 3.586313 | 89.7     | 5.912999 | 89.8     | 10.12224 | 89.9     | 15.13118 | 89.9     | 25.76792 |
| 89.69999695 | 2.962999999  | 89.8000035 | 4.9933   | 89.89999 | 8.671199 | 90       | 13.3176 | 90       | 22.7628 | 89.7     | 3.582278 | 89.8     | 5.904444 | 89.9     | 10.1055  | 90       | 15.10223 | 90       | 25.72195 |
| 89.79999542 | 2.968699534  | 89.8999939 | 4.986199 | 90       | 8.6556   | 90.1     | 13.2982 | 90.1     | 22.7244 | 89.8     | 3.578247 | 89.9     | 5.895902 | 90       | 10.0888  | 90.1     | 15.07336 | 90.1     | 25.6761  |
| 89.90000153 | 2.968599641  | 90         | 4.9829   | 90.10001 | 8.6438   | 90.2     | 13.2774 | 90.2     | 22.681  | 89.9     | 3.574221 | 90       | 5.887374 | 90.1     | 10.07123 | 90.2     | 15.04455 | 90.2     | 25.63037 |
| 90          | 2.966099999  | 90.1000061 | 4.9772   | 90.2     | 8.6285   | 90.3     | 13.2582 | 90.3     | 22.6435 | 90       | 3.5702   | 90.1     | 5.87886  | 90.2     | 10.0555  | 90.3     | 15.01583 | 90.3     | 25.58477 |
| 90.09999847 | 2.962699664  | 90.1999695 | 4.9713   | 90.3     | 8.6131   | 90.4     | 13.2388 | 90.4     | 22.6055 | 90.1     | 3.566183 | 90.2     | 5.870358 | 90.3     | 10.03889 | 90.4     | 14.98716 | 90.4     | 25.53929 |
| 90.20000458 | 2.960400335  | 90.3000035 | 4.9637   | 90.40001 | 8.6015   | 90.50001 | 13.2183 | 90.50001 | 22.5663 | 90.2     | 3.562171 | 90.3     | 5.861872 | 90.4     | 10.02232 | 90.49999 | 14.95888 | 90.49999 | 25.49393 |
| 90.29999542 | 2.960399664  | 90.3999939 | 4.957999 | 90.5     | 8.5893   | 90.6     | 13.1955 | 90.6     | 22.5264 | 90.3     | 3.558164 | 90.4     | 5.853397 | 90.49999 | 10.00578 | 90.6     | 14.93006 | 90.6     | 25.44869 |
| 90.40000153 | 2.958799481  | 90.5       | 4.9523   | 90.60001 | 8.5776   | 90.7     | 13.1752 | 90.7     | 22.4843 | 90.4     | 3.554162 | 90.49999 | 5.844937 | 90.6     | 9.989277 | 90.7     | 14.90162 | 90.7     | 25.40356 |
| 90.49999237 | 2.955399687  | 90.5999904 | 4.945699 | 90.7     | 8.5634   | 90.8     | 13.1545 | 90.8     | 22.4472 | 90.49999 | 3.550164 | 90.6     | 5.836489 | 90.7     | 9.972801 | 90.8     | 14.87325 | 90.8     | 25.35856 |
| 90.59999847 | 2.949199733  | 90.6999695 | 4.9313   | 90.8     | 8.5499   | 90.9     | 13.131  | 90.9     | 22.4037 | 90.6     | 3.546171 | 90.7     | 5.828054 | 90.8     | 9.95636  | 90.9     | 14.84494 | 90.9     | 25.31368 |
| 90.70000458 | 2.944000335  | 90.8000035 | 4.9225   | 90.90001 | 8.5324   | 91.00001 | 13.1075 | 91.00001 | 22.3615 | 90.7     | 3.542182 | 90.8     | 5.819634 | 90.9     | 9.939949 | 90.99999 | 14.81671 | 90.99999 | 25.26892 |
| 90.79999542 | 2.940499665  | 90.8999939 | 4.9104   | 91       | 8.5153   | 91.1     | 13.0826 | 91.1     | 22.3212 | 90.8     | 3.538199 | 90.9     | 5.811226 | 90.99999 | 9.923572 | 91.1     | 14.78855 | 91.1     | 25.22427 |
| 90.90000153 | 2.938600069  | 91         | 4.8986   | 91.10001 | 8.5027   | 91.2     | 13.0651 | 91.2     | 22.2858 | 90.9     | 3.53422  | 90.99999 | 5.802833 | 91.1     | 9.907224 | 91.2     | 14.76046 | 91.2     | 25.17973 |
| 90.99999237 | 2.933199969  | 91.0999904 | 4.8916   | 91.2     | 8.4945   | 91.3     | 13.0504 | 91.3     | 22.2486 | 90.99999 | 3.530246 | 91.1     | 5.794451 | 91.2     | 8.890908 | 91.3     | 14.73244 | 91.3     | 25.13532 |
| 91.09999847 | 2.928100015  | 91.1999695 | 4.8875   | 91.3     | 8.4847   | 91.4     | 13.0343 | 91.4     | 22.2127 | 91.1     | 3.526276 | 91.2     | 5.786083 | 91.3     | 8.874626 | 91.4     | 14.70488 | 91.4     | 25.09102 |
| 91.20000458 | 2.920000337  | 91.3000035 | 4.8801   | 91.40001 | 8.4723   | 91.50001 | 13.0151 | 91.50001 | 22.1715 | 91.2     | 3.522311 | 91.3     | 5.777729 | 91.4     | 8.858374 | 91.49999 | 14.6766  | 91.49999 | 25.04685 |
| 91.29999542 | 2.924999664  | 91.3999939 | 4.871099 | 91.5     | 8.4594   | 91.6     | 12.9916 | 91.6     | 22.1303 | 91.3     | 3.51835  | 91.4     | 5.769387 | 91.49999 | 8.842155 | 91.6     | 14.64878 | 91.6     | 25.00278 |
| 91.40000153 | 2.925999725  | 91.5       | 4.8634   | 91.60001 | 8.4414   | 91.7     | 12.9704 | 91.7     | 22.0925 | 91.4     | 3.514395 | 91.49999 | 5.76106  | 91.6     | 8.825965 | 91.7     | 14.62104 | 91.7     | 24.95882 |
| 91.49999237 | 2.923699763  | 91.5999904 | 4.853    | 91.7     | 8.4255   | 91.8     | 12.9453 | 91.8     | 22.0542 | 91.49999 | 3.510444 | 91.6     | 5.752744 | 91.7     | 8.809806 | 91.8     | 14.59336 | 91.8     | 24.91499 |
| 91.59999847 | 2.918400045  | 91.6999695 | 4.8458   | 91.8     | 8.4081   | 91.9     | 12.9279 | 91.9     | 22.0225 | 91.6     | 3.506497 | 91.7     | 5.744441 | 91.8     | 8.793682 | 91.9     | 14.56575 | 91.9     | 24.87126 |
| 91.70000458 | 2.910100031  | 91.8000035 | 4.839    | 91.90001 | 8.3967   | 92.00001 | 12.9086 | 92.00001 | 21.9847 | 91.7     | 3.502555 | 91.8     | 5.736153 | 91.9     | 8.777586 | 91.99999 | 14.53821 | 91.99999 | 24.82766 |
| 91.79999542 | 2.906699971  | 91.8999939 | 4.834799 | 92       | 8.3852   | 92.1     | 12.8915 | 92.1     | 21.9486 | 91.8     | 3.498618 | 91.9     | 5.727877 | 91.99999 | 8.761523 | 92.1     | 14.51073 | 92.1     | 24.78416 |
| 91.90000153 | 2.90559961   | 92         | 4.8245   | 92.10001 | 8.3718   | 92.2     | 12.8716 | 92.2     | 21.9087 | 91.9     | 3.494685 | 91.99999 | 5.719614 | 92.1     | 8.745489 | 92.2     | 14.48333 | 92.2     | 24.74077 |
| 91.99999237 | 2.904599758  | 92.0999695 | 4.819099 | 92.2     | 8.3601   | 92.3     | 12.8503 | 92.3     | 21.8736 | 91.99999 | 3.490758 | 92.1     | 5.711364 | 92.2     | 8.729486 | 92.3     | 14.45599 | 92.3     | 24.6975  |
| 92.09999847 | 2.902699573  | 92.1999695 | 4.8138   | 92.3     | 8.3462   | 92.4     | 12.8249 | 92.4     | 21.8386 | 92.1     | 3.486834 | 92.2     | 5.703126 | 92.3     | 8.713516 | 92.4     | 14.42871 | 92.4     | 24.65434 |
| 92.20000458 | 2.901000245  | 92.3000035 | 4.8104   | 92.40001 | 8.3351   | 92.50001 | 12.8067 | 92.50001 | 21.8005 | 92.2     | 3.482915 | 92.3     | 5.694903 | 92.4     | 8.697755 | 92.49999 | 14.40151 | 92.49999 | 24.61129 |
| 92.29999542 | 2.900399756  | 92.3999939 | 4.803499 | 92.5     | 8.3241   | 92.6     | 12.7857 | 92.6     | 21.773  | 92.3     | 3.479001 | 92.4     | 5.686692 | 92.49999 | 8.681666 | 92.6     | 14.37437 | 92.6     | 24.56835 |
| 92.40000153 | 2.898499748  | 92.5       | 4.796    | 92.60001 | 8.3114   | 92.7     | 12.7601 | 92.7     | 21.7345 | 92.4     | 3.475091 | 92.49999 | 5.678494 | 92.6     | 8.665786 | 92.7     | 14.34373 | 92.7     | 24.52551 |
| 92.49999237 | 2.894999681  | 92.5999904 | 4.786    | 92.7     | 8.2967   | 92.8     | 12.7423 | 92.8     | 21.6988 | 92.49999 | 3.471187 | 92.6     | 5.670308 | 92.7     | 8.649937 | 92.8     | 14.32029 | 92.8     | 24.48279 |
| 92.59999847 | 2.890999785  | 92.6999695 | 4.7783   | 92.8     | 8.2834   | 92.9     | 12.7    |          |         |          |          |          |          |          |          |          |          |          |          |

|             |             |             |          |          |        |          |         |          |         |          |          |          |          |          |          |          |          |          |          |
|-------------|-------------|-------------|----------|----------|--------|----------|---------|----------|---------|----------|----------|----------|----------|----------|----------|----------|----------|----------|----------|
| 98.90000153 | 2.71080002  | 99          | 4.4305   | 99.10001 | 7.5606 | 99.2     | 11.5963 | 99.2     | 19.6225 | 98.9     | 3.230534 | 98.99999 | 5.172186 | 99.1     | 8.695869 | 99.2     | 12.71927 | 99.2     | 21.95734 |
| 98.99999237 | 2.70669994  | 99.09999084 | 4.4195   | 99.2     | 7.549  | 99.3     | 11.5753 | 99.3     | 19.5904 | 98.99999 | 3.226915 | 99.1     | 5.164789 | 99.2     | 8.681853 | 99.3     | 12.69611 | 99.3     | 21.92088 |
| 99.09999847 | 2.70649877  | 99.19999695 | 4.4144   | 99.3     | 7.53   | 99.4     | 11.5591 | 99.4     | 19.5593 | 99.1     | 3.223299 | 99.2     | 5.157404 | 99.3     | 8.667865 | 99.4     | 12.67299 | 99.4     | 21.88449 |
| 99.20000458 | 2.70299981  | 99.30000305 | 4.4046   | 99.40001 | 7.5155 | 99.50001 | 11.5472 | 99.50001 | 19.5294 | 99.2     | 3.219688 | 99.3     | 5.15003  | 99.4     | 8.653901 | 99.49999 | 12.64993 | 99.49999 | 21.8482  |
| 99.29999542 | 2.697300185 | 99.3999939  | 4.3985   | 99.5     | 7.5041 | 99.6     | 11.5335 | 99.6     | 19.5002 | 99.3     | 3.216082 | 99.4     | 5.142668 | 99.49999 | 8.639966 | 99.6     | 12.62692 | 99.6     | 21.81198 |
| 99.40000153 | 2.694699993 | 99.5        | 4.3961   | 99.60001 | 7.4934 | 99.7     | 11.5176 | 99.7     | 19.4719 | 99.4     | 3.212479 | 99.49999 | 5.135317 | 99.6     | 8.626054 | 99.7     | 12.60396 | 99.7     | 21.77585 |
| 99.49999237 | 2.688499873 | 99.59999084 | 4.3931   | 99.7     | 7.4837 | 99.8     | 11.5007 | 99.8     | 19.4455 | 99.49999 | 3.208881 | 99.6     | 5.127977 | 99.7     | 8.612168 | 99.8     | 12.58106 | 99.8     | 21.7398  |
| 99.59999847 | 2.688499773 | 99.69999695 | 4.3867   | 99.8     | 7.4687 | 99.9     | 11.4875 | 99.9     | 19.4203 | 99.6     | 3.205287 | 99.7     | 5.120648 | 99.8     | 8.598309 | 99.9     | 12.55821 | 99.9     | 21.70384 |
| 99.70000458 | 2.685100239 | 99.80000305 | 4.382    | 99.90001 | 7.4596 | 100      | 11.4765 | 100      | 19.3959 | 99.7     | 3.201697 | 99.8     | 5.113332 | 99.8     | 8.584474 | 99.99999 | 12.53541 | 99.99999 | 21.66796 |
| 99.79999542 | 2.68279977  | 99.8999939  | 4.379899 | 100      | 7.451  | 100.1    | 11.4623 | 100.1    | 19.3651 | 99.8     | 3.198111 | 99.9     | 5.106026 | 99.99999 | 8.570667 | 100.1    | 12.51266 | 100.1    | 21.63216 |
| 99.90000153 | 2.684599991 | 100         | 4.3752   | 100.1    | 7.4422 | 100.2    | 11.4469 | 100.2    | 19.3379 | 99.9     | 3.194529 | 99.99999 | 5.098732 | 100.1    | 8.556884 | 100.2    | 12.48996 | 100.2    | 21.59644 |
| 99.99999237 | 2.685399702 | 100.0999908 | 4.37     | 100.2    | 7.4345 | 100.3    | 11.435  | 100.3    | 19.3105 | 99.99999 | 3.190952 | 100.1    | 5.091449 | 100.2    | 8.543126 | 100.3    | 12.46731 | 100.3    | 21.56081 |
| 100.0999985 | 2.682799914 | 100.1999969 | 4.364    | 100.3    | 7.4235 | 100.4    | 11.4231 | 100.4    | 19.2875 | 100.1    | 3.187379 | 100.2    | 5.084176 | 100.3    | 8.529395 | 100.4    | 12.44472 | 100.4    | 21.52525 |
| 100.2000046 | 2.683200264 | 100.3000031 | 4.3586   | 100.4    | 7.4123 | 100.5    | 11.4102 | 100.5    | 19.2623 | 100.2    | 3.183809 | 100.3    | 5.076916 | 100.4    | 8.515688 | 100.5    | 12.42217 | 100.5    | 21.48979 |
| 100.2999954 | 2.684349974 | 100.3999939 | 4.350299 | 100.5    | 7.4016 | 100.6    | 11.3966 | 100.6    | 19.2335 | 100.3    | 3.180245 | 100.4    | 5.069666 | 100.5    | 8.502008 | 100.6    | 12.39968 | 100.6    | 21.45439 |
| 100.4000015 | 2.684699604 | 100.5       | 4.346    | 100.6    | 7.3936 | 100.7    | 11.3789 | 100.7    | 19.2079 | 100.4    | 3.176684 | 100.5    | 5.062428 | 100.6    | 8.488351 | 100.7    | 12.37724 | 100.7    | 21.41908 |
| 100.4999924 | 2.684999666 | 100.5999908 | 4.341899 | 100.7    | 7.3831 | 100.8    | 11.3636 | 100.8    | 19.1788 | 100.5    | 3.173127 | 100.6    | 5.055201 | 100.7    | 8.474712 | 100.8    | 12.35485 | 100.8    | 21.38385 |
| 100.5999985 | 2.680899727 | 100.6999969 | 4.3363   | 100.8    | 7.3688 | 100.9    | 11.3495 | 100.9    | 19.1496 | 100.6    | 3.169575 | 100.7    | 5.047984 | 100.8    | 8.461115 | 100.9    | 12.33259 | 100.9    | 21.34387 |
| 100.7000046 | 2.676499922 | 100.8000031 | 4.327    | 100.9    | 7.359  | 101      | 11.3317 | 101      | 19.1213 | 100.7    | 3.166026 | 100.8    | 5.04078  | 100.9    | 8.447534 | 101      | 12.31021 | 101      | 21.31364 |
| 100.7999954 | 2.671900071 | 100.8999939 | 4.327299 | 101      | 7.3474 | 101.1    | 11.3166 | 101.1    | 19.0942 | 100.8    | 3.162482 | 100.9    | 5.033585 | 101      | 8.43398  | 101.1    | 12.28797 | 101.1    | 21.27864 |
| 100.9000015 | 2.668599682 | 101         | 4.321    | 101.1    | 7.3416 | 101.2    | 11.3004 | 101.2    | 19.0653 | 100.9    | 3.158942 | 101      | 5.026403 | 101.1    | 8.420448 | 101.2    | 12.26578 | 101.2    | 21.24373 |
| 100.9999924 | 2.661399974 | 101.0999908 | 4.318199 | 101.2    | 7.334  | 101.3    | 11.2893 | 101.3    | 19.0394 | 101.1    | 3.155406 | 101.1    | 5.019231 | 101.2    | 8.406942 | 101.3    | 12.24364 | 101.3    | 21.2089  |
| 101.0999985 | 2.663499723 | 101.1999969 | 4.3083   | 101.3    | 7.3272 | 101.4    | 11.2792 | 101.4    | 19.0131 | 101.1    | 3.151874 | 101.2    | 5.01207  | 101.3    | 8.393462 | 101.4    | 12.22155 | 101.4    | 21.17415 |
| 101.2000046 | 2.658300363 | 101.3000031 | 4.3051   | 101.4    | 7.3165 | 101.5    | 11.2645 | 101.5    | 18.9861 | 101.2    | 3.148346 | 101.3    | 5.004921 | 101.4    | 8.380006 | 101.5    | 12.1995  | 101.5    | 21.13948 |
| 101.2999954 | 2.65869964  | 101.3999939 | 4.302599 | 101.5    | 7.3086 | 101.6    | 11.252  | 101.6    | 18.9576 | 101.3    | 3.144822 | 101.4    | 4.997781 | 101.5    | 8.366576 | 101.6    | 12.17751 | 101.6    | 21.10488 |
| 101.4000015 | 2.65829973  | 101.5       | 4.2975   | 101.6    | 7.2989 | 101.7    | 11.2393 | 101.7    | 18.9353 | 101.4    | 3.141303 | 101.5    | 4.990654 | 101.6    | 8.353168 | 101.7    | 12.15556 | 101.7    | 21.07036 |
| 101.4999924 | 2.653899741 | 101.5999908 | 4.2931   | 101.7    | 7.2899 | 101.8    | 11.2254 | 101.8    | 18.9113 | 101.5    | 3.137787 | 101.6    | 4.983537 | 101.7    | 8.339786 | 101.8    | 12.13367 | 101.8    | 21.03592 |
| 101.5999985 | 2.648998835 | 101.6999969 | 4.2898   | 101.8    | 7.2786 | 101.9    | 11.211  | 101.9    | 18.8828 | 101.6    | 3.134276 | 101.7    | 4.976431 | 101.8    | 8.32643  | 101.9    | 12.11182 | 101.9    | 21.00156 |
| 101.7000046 | 2.645300247 | 101.8000031 | 4.2871   | 101.9    | 7.2714 | 102      | 11.1972 | 102      | 18.8596 | 101.7    | 3.130768 | 101.8    | 4.969336 | 101.9    | 8.313096 | 102      | 12.09003 | 102      | 20.96727 |
| 101.7999954 | 2.646299765 | 101.8999939 | 4.2843   | 102      | 7.2644 | 102.1    | 11.1871 | 102.1    | 18.8394 | 101.8    | 3.127265 | 101.9    | 4.962522 | 102      | 8.299789 | 102.1    | 12.06828 | 102.1    | 20.93306 |
| 101.9000015 | 2.64199832  | 102         | 4.2787   | 102.1    | 7.2598 | 102.2    | 11.1722 | 102.2    | 18.8217 | 101.9    | 3.123766 | 102      | 4.955179 | 102.1    | 8.286504 | 102.2    | 12.04657 | 102.2    | 20.89893 |
| 101.9999924 | 2.64079813  | 102.0999908 | 4.280999 | 102.2    | 7.2532 | 102.3    | 11.1594 | 102.3    | 18.7933 | 102      | 3.120271 | 102.1    | 4.948117 | 102.2    | 8.273243 | 102.3    | 12.02492 | 102.3    | 20.86487 |
| 102.0999985 | 2.642999544 | 102.1999969 | 4.2795   | 102.3    | 7.2447 | 102.4    | 11.1493 | 102.4    | 18.7749 | 102.1    | 3.11678  | 102.2    | 4.941065 | 102.3    | 8.260009 | 102.4    | 12.00332 | 102.4    | 20.83089 |
| 102.2000046 | 2.645300205 | 102.3000031 | 4.2745   | 102.4    | 7.236  | 102.5    | 11.1338 | 102.5    | 18.7409 | 102.2    | 3.113292 | 102.3    | 4.934025 | 102.4    | 8.246797 | 102.5    | 11.98176 | 102.5    | 20.79699 |
| 102.2999954 | 2.644699788 | 102.3999939 | 4.2733   | 102.5    | 7.2274 | 102.6    | 11.1181 | 102.6    | 18.715  | 102.3    | 3.10981  | 102.4    | 4.926994 | 102.5    | 8.233612 | 102.6    | 11.96025 | 102.6    | 20.76316 |
| 102.4000015 | 2.639199753 | 102.5       | 4.2708   | 102.6    | 7.2201 | 102.7    | 11.1047 | 102.7    | 18.6922 | 102.4    | 3.106331 | 102.5    | 4.919976 | 102.6    | 8.220448 | 102.7    | 11.93879 | 102.7    | 20.7294  |
| 102.4999924 | 2.640399715 | 102.5999908 | 4.2651   | 102.7    | 7.2117 | 102.8    | 11.0874 | 102.8    | 18.663  | 102.5    | 3.102856 | 102.6    | 4.912967 | 102.7    | 8.207308 | 102.8    | 11.91738 | 102.8    | 20.69573 |
| 102.5999985 | 2.638599792 | 102.6999969 | 4.2592   | 102.8    | 7.2023 | 102.9    | 11.0721 | 102.9    | 18.6326 | 102.6    | 3.099385 | 102.7    | 4.905699 | 102.8    | 8.194195 | 102.9    | 11.89601 | 102.9    | 20.66212 |
| 102.7000046 | 2.634299843 | 102.8000031 | 4.2493   | 102.9    | 7.1944 | 103      | 11.0559 | 103      | 18.6047 | 102.7    | 3.095918 | 102.8    | 4.898983 | 102.9    | 8.181103 | 103      | 11.8747  | 103      | 20.6286  |
| 102.7999954 | 2.62740015  | 102.8999939 | 4.2394   | 103      | 7.1858 | 103.1    | 11.0395 | 103.1    | 18.5792 | 102.8    | 3.092455 | 102.9    | 4.892006 | 103      | 8.168037 | 103.1    | 11.85342 | 103.1    | 20.59514 |
| 102.9000015 | 2.622799975 | 103         | 4.2313   | 103.1    | 7.1769 | 103.2    | 11.0237 | 103.2    | 18.5522 | 102.9    | 3.088996 | 103      | 4.885042 | 103.1    | 8.154993 | 103.2    | 11.8322  | 103.2    | 20.56176 |
| 102.9999924 | 2.617199992 | 103.0999908 | 4.2287   | 103.2    | 7.1657 | 103.3    | 11.0117 | 103.3    | 18.5259 | 103      | 3.085542 | 103.1    | 4.878086 | 103.2    | 8.141973 | 103.3    | 11.81102 | 103.3    | 20.52846 |
| 103.0999985 | 2.612899748 | 103.1999969 | 4.2218   | 103.3    | 7.1573 | 103.4    | 10.998  | 103.4    | 18.5008 | 103.1    | 3.082091 | 103.2    | 4.871142 | 103.3    | 8.128979 | 103.4    | 11.78989 | 103.4    | 20.49522 |
| 103.2000046 | 2.608200165 | 103.3000031 | 4.2188   | 103.4    | 7.1491 | 103.5    | 10.9846 | 103.5    | 18.4719 | 103.2    | 3.078644 | 103.3    | 4.864209 | 103.4    | 8.116006 | 103.5    | 11.7688  | 103.5    | 20.46206 |
| 103.2999954 | 2.605698832 | 103.3999939 | 4.2147   | 103.5    | 7.1434 | 103.6    | 10.9735 | 103.6    | 18.4492 | 103.3    | 3.075201 | 103.4    | 4.857286 | 103.5    | 8.103059 | 103.6    | 11.74777 | 103.6    | 20.42897 |
| 103.4000015 | 2.604398889 | 103.5       | 4.2087   | 103.6    | 7.1403 | 103.7    | 10.9603 | 103.7    | 18.4251 | 103.4    | 3.071762 | 103.5    | 4.850374 | 103.6    | 8.090134 | 103.7    | 11.72677 | 103.7    | 20.39596 |
| 103.4999924 | 2.601398813 | 103.5999908 | 4.206199 | 103.7    | 7.1336 | 103.8    | 10.946  | 103.8    | 18.3956 | 103.5    | 3.068328 | 103.6    | 4.843472 | 103.7    | 8.077332 | 103.8    | 11.70583 | 103.8    | 20.36302 |
| 103.5999985 | 2.606399541 | 103.6999969 | 4.2049   | 103.8    | 7.1256 | 103.9    | 10.9296 | 103.9    | 18.3657 | 103.6    | 3.064897 | 103.7    | 4.836558 | 103.8    | 8.064355 | 103.9    | 11.68493 | 103.9    | 20.33015 |
| 103.7000046 | 2.60790158  | 103.8000031 | 4.2011   | 103.9    | 7.1125 | 104      | 10.915  | 104      | 18.3346 | 103.7    | 3.06147  | 103.8    | 4.8297   | 103.9    | 8.0515   | 104      | 11.66407 | 104      | 20.29735 |
| 103.7999954 | 2.604498847 | 103.8999939 | 4.1916   | 104      | 7.0982 | 104.1    | 10.901  | 104.1    | 18.3091 | 103.8    | 3.058047 | 103.9    | 4.82283  | 104      | 8.038671 | 104.1    | 11.64326 | 104.1    | 20.26463 |
| 103.9000015 | 2.60239996  | 104         | 4.1852   | 104.1    | 7.0855 | 104.2    | 10.8898 | 104.2    | 18.2811 | 103.9    | 3.054628 | 104      | 4.815971 | 104.1    | 8.025862 | 104.2    | 11.6225  | 104.2    | 20.23197 |
| 103.9999924 | 2.596200039 | 104.0999908 | 4.1821   | 104.2    | 7.0766 | 104.3    | 10.8753 | 104.3    | 18.2529 | 104      | 3.051214 | 104.1    |          |          |          |          |          |          |          |

|             |             |               |          |       |        |       |         |       |         |       |          |       |          |       |          |       |          |       |          |
|-------------|-------------|---------------|----------|-------|--------|-------|---------|-------|---------|-------|----------|-------|----------|-------|----------|-------|----------|-------|----------|
| 110.4000015 | 2.517499792 | 110.5         | 3.9564   | 110.6 | 6.6317 | 110.7 | 10.1054 | 110.7 | 16.812  | 110.4 | 2.840685 | 110.5 | 4.391783 | 110.6 | 7.240951 | 110.7 | 10.36445 | 110.7 | 18.2524  |
| 110.4999924 | 2.514499833 | 110.5999908   | 3.9519   | 110.7 | 6.6257 | 110.8 | 10.0921 | 110.8 | 16.7921 | 110.5 | 2.837518 | 110.6 | 4.385578 | 110.7 | 7.229572 | 110.8 | 10.34641 | 110.8 | 18.224   |
| 110.5999985 | 2.510700048 | 110.6999969   | 3.9483   | 110.8 | 6.6194 | 110.9 | 10.0816 | 110.9 | 16.7726 | 110.6 | 2.834354 | 110.7 | 4.379382 | 110.8 | 7.218214 | 110.9 | 10.32842 | 110.9 | 18.19565 |
| 110.7000046 | 2.507400059 | 110.8000031   | 3.9413   | 110.9 | 6.6153 | 111.0 | 10.069  | 111.0 | 16.7505 | 110.7 | 2.831193 | 110.8 | 4.373196 | 110.9 | 7.206875 | 111.0 | 10.31046 | 111.0 | 18.16736 |
| 110.7999954 | 2.504599926 | 110.8999939   | 3.9381   | 111.0 | 6.6099 | 111.1 | 10.0565 | 111.1 | 16.7304 | 110.8 | 2.828037 | 110.9 | 4.367019 | 111.0 | 7.195557 | 111.1 | 10.29254 | 111.1 | 18.13913 |
| 110.9000015 | 2.503799735 | 111.0         | 3.9376   | 111.1 | 6.6054 | 111.2 | 10.0474 | 111.2 | 16.7137 | 110.9 | 2.824884 | 111.0 | 4.360852 | 111.1 | 7.184258 | 111.2 | 10.27465 | 111.2 | 18.11095 |
| 110.9999924 | 2.504599799 | 111.0999908   | 3.939199 | 111.2 | 6.5989 | 111.3 | 10.0353 | 111.3 | 16.6942 | 111.1 | 2.821735 | 111.1 | 4.354693 | 111.2 | 7.172979 | 111.3 | 10.25681 | 111.3 | 18.08283 |
| 111.0999985 | 2.505099725 | 111.1999969   | 3.9427   | 111.3 | 6.5952 | 111.4 | 10.0205 | 111.4 | 16.6663 | 111.1 | 2.818589 | 111.2 | 4.348544 | 111.3 | 7.161721 | 111.4 | 10.239   | 111.4 | 18.05477 |
| 111.2000046 | 2.507500253 | 111.3000031   | 3.9392   | 111.4 | 6.5822 | 111.5 | 10.0077 | 111.5 | 16.6449 | 111.2 | 2.815447 | 111.3 | 4.342404 | 111.4 | 7.150481 | 111.5 | 10.22122 | 111.5 | 18.02677 |
| 111.2999954 | 2.50509977  | 111.3999939   | 3.9307   | 111.5 | 6.5735 | 111.6 | 9.9976  | 111.6 | 16.6226 | 111.3 | 2.812309 | 111.4 | 4.336273 | 111.5 | 7.139263 | 111.6 | 10.20349 | 111.6 | 17.99882 |
| 111.4000015 | 2.496800017 | 111.5         | 3.9255   | 111.6 | 6.5652 | 111.7 | 9.9818  | 111.7 | 16.6004 | 111.4 | 2.809174 | 111.5 | 4.330153 | 111.6 | 7.128063 | 111.7 | 10.18579 | 111.7 | 17.97093 |
| 111.4999924 | 2.492599972 | 111.5999908   | 3.9226   | 111.7 | 6.5578 | 111.8 | 9.9692  | 111.8 | 16.5852 | 111.5 | 2.806043 | 111.6 | 4.324004 | 111.7 | 7.116882 | 111.8 | 10.16812 | 111.8 | 17.9431  |
| 111.5999985 | 2.490599926 | 111.6999969   | 3.9218   | 111.8 | 6.5511 | 111.9 | 9.9617  | 111.9 | 16.5624 | 111.6 | 2.802916 | 111.7 | 4.317937 | 111.8 | 7.105723 | 111.9 | 10.1505  | 111.9 | 17.91532 |
| 111.7000046 | 2.486900264 | 111.8000031   | 3.9212   | 111.9 | 6.5476 | 112.0 | 9.9501  | 112.0 | 16.5387 | 111.7 | 2.799792 | 111.8 | 4.311844 | 111.9 | 7.094582 | 112.0 | 10.13291 | 112.0 | 17.8876  |
| 111.7999954 | 2.485399739 | 111.8999939   | 3.9183   | 112.0 | 6.5435 | 112.1 | 9.9377  | 112.1 | 16.5182 | 111.8 | 2.796671 | 111.9 | 4.305759 | 112.0 | 7.083462 | 112.1 | 10.11535 | 112.1 | 17.85993 |
| 111.9000015 | 2.482999839 | 112.0         | 3.9188   | 112.1 | 6.5371 | 112.2 | 9.9259  | 112.2 | 16.4966 | 111.9 | 2.793555 | 112.0 | 4.299684 | 112.1 | 7.07236  | 112.2 | 10.09783 | 112.2 | 17.83231 |
| 111.9999924 | 2.48219983  | 112.0999908   | 3.9155   | 112.2 | 6.5321 | 112.3 | 9.9159  | 112.3 | 16.4728 | 112.0 | 2.790442 | 112.1 | 4.293618 | 112.2 | 7.061278 | 112.3 | 10.08036 | 112.3 | 17.80476 |
| 112.0999985 | 2.478789936 | 112.1999969   | 3.9153   | 112.3 | 6.5251 | 112.4 | 9.9015  | 112.4 | 16.4498 | 112.1 | 2.787332 | 112.2 | 4.28756  | 112.3 | 7.050217 | 112.4 | 10.06291 | 112.4 | 17.77726 |
| 112.2000046 | 2.477100205 | 112.3000031   | 3.9146   | 112.4 | 6.5198 | 112.5 | 9.8916  | 112.5 | 16.4275 | 112.2 | 2.784226 | 112.3 | 4.281513 | 112.4 | 7.039173 | 112.5 | 10.0455  | 112.5 | 17.74982 |
| 112.2999954 | 2.479699812 | 112.3999939   | 3.91     | 112.5 | 6.5141 | 112.6 | 9.8848  | 112.6 | 16.4084 | 112.3 | 2.781124 | 112.4 | 4.275474 | 112.5 | 7.028151 | 112.6 | 10.02813 | 112.6 | 17.72243 |
| 112.4000015 | 2.477899908 | 112.5         | 3.9075   | 112.6 | 6.5104 | 112.7 | 9.873   | 112.7 | 16.3819 | 112.4 | 2.778025 | 112.5 | 4.269444 | 112.6 | 7.017146 | 112.7 | 10.01079 | 112.7 | 17.69509 |
| 112.4999924 | 2.473899948 | 112.5999908   | 3.907899 | 112.7 | 6.4998 | 112.8 | 9.8641  | 112.8 | 16.3603 | 112.5 | 2.77493  | 112.6 | 4.263423 | 112.7 | 7.00616  | 112.8 | 9.993487 | 112.8 | 17.66781 |
| 112.5999985 | 2.473799738 | 112.6999969   | 3.8998   | 112.8 | 6.4919 | 112.9 | 9.8537  | 112.9 | 16.3382 | 112.6 | 2.771838 | 112.7 | 4.257411 | 112.8 | 6.995196 | 112.9 | 9.976219 | 112.9 | 17.64058 |
| 112.7000046 | 2.468200125 | 112.8000031   | 3.8929   | 112.9 | 6.483  | 113.0 | 9.8402  | 113.0 | 16.3155 | 112.7 | 2.76875  | 112.8 | 4.251409 | 112.9 | 6.984249 | 113.0 | 9.959899 | 113.0 | 17.61341 |
| 112.7999954 | 2.463499897 | 112.8999939   | 3.8868   | 113.0 | 6.4741 | 113.1 | 9.8255  | 113.1 | 16.2957 | 112.8 | 2.765665 | 112.9 | 4.245415 | 113.0 | 6.973323 | 113.1 | 9.941792 | 113.1 | 17.5863  |
| 112.9000015 | 2.460099953 | 113.0         | 3.8826   | 113.1 | 6.469  | 113.2 | 9.8133  | 113.2 | 16.2767 | 112.9 | 2.762584 | 113.0 | 4.239431 | 113.1 | 6.962414 | 113.2 | 9.924631 | 113.2 | 17.55923 |
| 112.9999924 | 2.457500039 | 113.0999908   | 3.8806   | 113.2 | 6.4627 | 113.3 | 9.8035  | 113.3 | 16.256  | 113.0 | 2.759507 | 113.1 | 4.233455 | 113.2 | 6.951525 | 113.3 | 9.907507 | 113.3 | 17.53222 |
| 113.0999985 | 2.458699881 | 113.1999969   | 3.8766   | 113.3 | 6.4532 | 113.4 | 9.7953  | 113.4 | 16.2356 | 113.1 | 2.756433 | 113.2 | 4.227488 | 113.3 | 6.940656 | 113.4 | 9.890415 | 113.4 | 17.50527 |
| 113.2000046 | 2.458600163 | 113.3000031   | 3.8731   | 113.4 | 6.448  | 113.5 | 9.7851  | 113.5 | 16.2181 | 113.2 | 2.753362 | 113.3 | 4.221531 | 113.4 | 6.929804 | 113.5 | 9.873361 | 113.5 | 17.47837 |
| 113.2999954 | 2.456599866 | 113.3999939   | 3.8729   | 113.5 | 6.4442 | 113.6 | 9.7747  | 113.6 | 16.2009 | 113.3 | 2.750296 | 113.4 | 4.215582 | 113.5 | 6.918973 | 113.6 | 9.85634  | 113.6 | 17.45152 |
| 113.4000015 | 2.453699856 | 113.5         | 3.8717   | 113.6 | 6.4381 | 113.7 | 9.7608  | 113.7 | 16.1815 | 113.4 | 2.747232 | 113.5 | 4.209642 | 113.6 | 6.90816  | 113.7 | 9.839353 | 113.7 | 17.42472 |
| 113.4999924 | 2.453599702 | 113.5999908   | 3.868999 | 113.7 | 6.4285 | 113.8 | 9.7508  | 113.8 | 16.1613 | 113.5 | 2.744173 | 113.6 | 4.203711 | 113.7 | 6.897365 | 113.8 | 9.822403 | 113.8 | 17.39798 |
| 113.5999985 | 2.45269971  | 113.6999969   | 3.8623   | 113.8 | 6.4241 | 113.9 | 9.7403  | 113.9 | 16.1398 | 113.6 | 2.741116 | 113.7 | 4.197789 | 113.8 | 6.886591 | 113.9 | 9.805486 | 113.9 | 17.37129 |
| 113.7000046 | 2.450900208 | 113.8000031   | 3.8609   | 113.9 | 6.4155 | 114.0 | 9.731   | 114.0 | 16.1222 | 113.7 | 2.738064 | 113.8 | 4.191876 | 113.9 | 6.875833 | 114.0 | 9.788605 | 114.0 | 17.34466 |
| 113.7999954 | 2.451599805 | 113.8999939   | 3.86     | 114.0 | 6.41   | 114.1 | 9.7186  | 114.1 | 16.1061 | 113.8 | 2.735015 | 113.9 | 4.185971 | 114.0 | 6.865097 | 114.1 | 9.771757 | 114.1 | 17.31807 |
| 113.9000015 | 2.450199901 | 114.0         | 3.8611   | 114.1 | 6.3999 | 114.2 | 9.705   | 114.2 | 16.0858 | 113.9 | 2.731969 | 114.0 | 4.180076 | 114.1 | 6.854377 | 114.2 | 9.754942 | 114.2 | 17.29154 |
| 113.9999924 | 2.45069977  | 114.0999908   | 3.8587   | 114.2 | 6.3918 | 114.3 | 9.6916  | 114.3 | 16.0632 | 114.0 | 2.728927 | 114.1 | 4.174189 | 114.2 | 6.843676 | 114.3 | 9.738165 | 114.3 | 17.26506 |
| 114.0999985 | 2.45229982  | 114.1999969   | 3.8555   | 114.3 | 6.3834 | 114.4 | 9.6823  | 114.4 | 16.0392 | 114.1 | 2.725888 | 114.2 | 4.168311 | 114.3 | 6.832995 | 114.4 | 9.721419 | 114.4 | 17.23864 |
| 114.2000046 | 2.446799863 | 114.3000031   | 3.848    | 114.4 | 6.3798 | 114.5 | 9.6712  | 114.5 | 16.0164 | 114.2 | 2.722852 | 114.3 | 4.162443 | 114.4 | 6.822332 | 114.5 | 9.70471  | 114.5 | 17.21227 |
| 114.2999954 | 2.442500144 | 114.3999939   | 3.844999 | 114.5 | 6.3749 | 114.6 | 9.6607  | 114.6 | 15.9929 | 114.3 | 2.719821 | 114.4 | 4.156582 | 114.5 | 6.811688 | 114.6 | 9.688032 | 114.6 | 17.18594 |
| 114.4000015 | 2.444799728 | 114.5         | 3.8404   | 114.6 | 6.368  | 114.7 | 9.6469  | 114.7 | 15.9722 | 114.4 | 2.716793 | 114.5 | 4.150731 | 114.6 | 6.801061 | 114.7 | 9.671388 | 114.7 | 17.15967 |
| 114.4999924 | 2.446399821 | 114.5999908   | 3.8345   | 114.7 | 6.3606 | 114.8 | 9.6361  | 114.8 | 15.9557 | 114.5 | 2.713768 | 114.6 | 4.144888 | 114.7 | 6.790453 | 114.8 | 9.65478  | 114.8 | 17.13345 |
| 114.5999985 | 2.442700053 | 114.6999969   | 3.8323   | 114.8 | 6.3564 | 114.9 | 9.6245  | 114.9 | 15.9356 | 114.6 | 2.710747 | 114.7 | 4.139054 | 114.8 | 6.779865 | 114.9 | 9.638203 | 114.9 | 17.10728 |
| 114.7000046 | 2.438600269 | 114.8000031   | 3.8297   | 114.9 | 6.347  | 115.0 | 9.6119  | 115.0 | 15.9116 | 114.7 | 2.707729 | 114.8 | 4.133229 | 114.9 | 6.769294 | 115.0 | 9.621663 | 115.0 | 17.08117 |
| 114.7999954 | 2.441899717 | 114.8999939   | 3.8244   | 115.0 | 6.3394 | 115.1 | 9.5951  | 115.1 | 15.8876 | 114.8 | 2.704715 | 114.9 | 4.127413 | 115.0 | 6.758743 | 115.1 | 9.605153 | 115.1 | 17.05511 |
| 114.9000015 | 2.440199926 | 115.0         | 3.8191   | 115.1 | 6.3252 | 115.2 | 9.5826  | 115.2 | 15.8695 | 114.9 | 2.701704 | 115.0 | 4.121605 | 115.1 | 6.748208 | 115.2 | 9.588677 | 115.2 | 17.02909 |
| 114.9999924 | 2.436400012 | 115.0999908   | 3.812011 | 115.2 | 6.3199 | 115.3 | 9.5697  | 115.3 | 15.8514 | 115.1 | 2.698696 | 115.1 | 4.115806 | 115.2 | 6.737692 | 115.3 | 9.572237 | 115.3 | 17.00313 |
| 115.0999985 | 2.424300355 | 115.1999969   | 3.8083   | 115.3 | 6.3152 | 115.4 | 9.5527  | 115.4 | 15.8285 | 115.2 | 2.695692 | 115.2 | 4.110015 | 115.3 | 6.727196 | 115.4 | 9.555827 | 115.4 | 16.97722 |
| 115.2000046 | 2.42310019  | 115.3000031   | 3.8091   | 115.4 | 6.3065 | 115.5 | 9.5399  | 115.5 | 15.8039 | 115.2 | 2.692692 | 115.3 | 4.104234 | 115.4 | 6.716716 | 115.5 | 9.539454 | 115.5 | 16.95136 |
| 115.2999954 | 2.42369983  | 115.3999939   | 3.8022   | 115.5 | 6.2971 | 115.6 | 9.5299  | 115.6 | 15.7828 | 115.3 | 2.689695 | 115.4 | 4.098461 | 115.5 | 6.706256 | 115.6 | 9.52311  | 115.6 | 16.92555 |
| 115.4000015 | 2.416300253 | 115.5         | 3.7922   | 115.6 | 6.2902 | 115.7 | 9.52    | 115.7 | 15.7649 | 115.4 | 2.686701 | 115.5 | 4.092697 | 115.6 | 6.695813 | 115.7 | 9.5068   | 115.7 | 16.89978 |
| 115.4999924 | 2.411100159 | 115.5999908</ |          |       |        |       |         |       |         |       |          |       |          |       |          |       |          |       |          |



|             |             |             |          |       |        |       |          |       |         |       |          |       |          |       |          |       |          |       |          |
|-------------|-------------|-------------|----------|-------|--------|-------|----------|-------|---------|-------|----------|-------|----------|-------|----------|-------|----------|-------|----------|
| 121.9000015 | 2.307699822 | 122         | 3.5627   | 122.1 | 5.8824 | 122.2 | 8.9114   | 122.2 | 14.6318 | 121.9 | 2.499309 | 122   | 3.735853 | 122.1 | 6.054226 | 122.2 | 8.513516 | 122.2 | 15.32702 |
| 121.9999924 | 2.307299892 | 122.0999908 | 3.5615   | 122.2 | 5.8792 | 122.3 | 8.9049   | 122.3 | 14.616  | 122.2 | 2.496534 | 122.1 | 3.730627 | 122.2 | 6.044902 | 122.3 | 8.499207 | 122.3 | 15.3043  |
| 122.0999985 | 2.30399787  | 122.1999969 | 3.5622   | 122.3 | 5.8702 | 122.4 | 8.8975   | 122.4 | 14.6017 | 122.1 | 2.493762 | 122.2 | 3.725409 | 122.3 | 6.035594 | 122.4 | 8.484924 | 122.4 | 15.28161 |
| 122.2000046 | 2.300699983 | 122.3000031 | 3.5567   | 122.4 | 5.8657 | 122.5 | 8.8941   | 122.5 | 14.591  | 122.2 | 2.490993 | 122.3 | 3.7202   | 122.4 | 6.026301 | 122.5 | 8.470671 | 122.5 | 15.25897 |
| 122.2999954 | 2.296600053 | 122.3999939 | 3.5543   | 122.5 | 5.8651 | 122.6 | 8.8866   | 122.6 | 14.5759 | 122.3 | 2.488227 | 122.4 | 3.714997 | 122.5 | 6.017026 | 122.6 | 8.456443 | 122.6 | 15.23638 |
| 122.4000015 | 2.297699795 | 122.5       | 3.5585   | 122.6 | 5.8588 | 122.7 | 8.8798   | 122.7 | 14.5634 | 122.4 | 2.485464 | 122.5 | 3.709803 | 122.6 | 6.007764 | 122.7 | 8.442243 | 122.7 | 15.21382 |
| 122.4999924 | 2.30229945  | 122.5999908 | 3.5556   | 122.7 | 5.8586 | 122.8 | 8.8706   | 122.8 | 14.5468 | 122.5 | 2.482705 | 122.6 | 3.704616 | 122.7 | 5.998518 | 122.8 | 8.428072 | 122.8 | 15.1913  |
| 122.5999985 | 2.300799894 | 122.6999969 | 3.558    | 122.8 | 5.8534 | 122.9 | 8.8607   | 122.9 | 14.5291 | 122.6 | 2.479949 | 122.7 | 3.699437 | 122.8 | 5.98929  | 122.9 | 8.413927 | 122.9 | 15.16883 |
| 122.7000046 | 2.303300111 | 122.8000031 | 3.5518   | 122.9 | 5.8493 | 123   | 8.8529   | 123   | 14.5128 | 122.7 | 2.477195 | 122.8 | 3.694266 | 122.9 | 5.980075 | 123   | 8.399811 | 123   | 15.1464  |
| 122.7999954 | 2.302699856 | 122.8999939 | 3.5476   | 123   | 5.8463 | 123.1 | 8.8446   | 123.1 | 14.4934 | 122.8 | 2.474446 | 122.9 | 3.689101 | 123   | 5.970877 | 123.1 | 8.385721 | 123.1 | 15.12401 |
| 122.9000015 | 2.299999893 | 123         | 3.5414   | 123.1 | 5.8421 | 123.2 | 8.8357   | 123.2 | 14.4775 | 122.9 | 2.471699 | 123   | 3.683946 | 123.1 | 5.961694 | 123.2 | 8.371658 | 123.2 | 15.10166 |
| 122.9999924 | 2.29709993  | 123.0999908 | 3.5371   | 123.2 | 5.8382 | 123.3 | 8.828    | 123.3 | 14.4646 | 123.1 | 2.468955 | 123.1 | 3.678797 | 123.2 | 5.952526 | 123.3 | 8.357624 | 123.3 | 15.07935 |
| 123.0999985 | 2.294100053 | 123.1999969 | 3.5329   | 123.3 | 5.8335 | 123.4 | 8.8153   | 123.4 | 14.4469 | 123.1 | 2.466214 | 123.2 | 3.673655 | 123.3 | 5.943376 | 123.4 | 8.343615 | 123.4 | 15.05708 |
| 123.2000046 | 2.290500189 | 123.3000031 | 3.5331   | 123.4 | 5.8275 | 123.5 | 8.807    | 123.5 | 14.4316 | 123.2 | 2.463477 | 123.3 | 3.668522 | 123.4 | 5.934239 | 123.5 | 8.329635 | 123.5 | 15.03486 |
| 123.2999954 | 2.288899812 | 123.3999939 | 3.5287   | 123.5 | 5.8237 | 123.6 | 8.8006   | 123.6 | 14.4161 | 123.3 | 2.460743 | 123.4 | 3.663396 | 123.5 | 5.925119 | 123.6 | 8.31568  | 123.6 | 15.01267 |
| 123.4000015 | 2.283900126 | 123.5       | 3.5249   | 123.6 | 5.8204 | 123.7 | 8.7926   | 123.7 | 14.4054 | 123.4 | 2.458011 | 123.5 | 3.658278 | 123.6 | 5.916013 | 123.7 | 8.301753 | 123.7 | 14.99052 |
| 123.4999924 | 2.283399862 | 123.5999908 | 3.5264   | 123.7 | 5.821  | 123.8 | 8.7854   | 123.8 | 14.3887 | 123.5 | 2.455284 | 123.6 | 3.653167 | 123.7 | 5.906922 | 123.8 | 8.287854 | 123.8 | 14.96842 |
| 123.5999985 | 2.28319981  | 123.6999969 | 3.5247   | 123.8 | 5.818  | 123.9 | 8.7781   | 123.9 | 14.3752 | 123.6 | 2.452559 | 123.7 | 3.648063 | 123.8 | 5.897848 | 123.9 | 8.273979 | 123.9 | 14.94636 |
| 123.7000046 | 2.281899953 | 123.8000031 | 3.5177   | 123.9 | 5.8174 | 124   | 8.773401 | 124   | 14.3642 | 123.7 | 2.449837 | 123.8 | 3.642968 | 123.9 | 5.888788 | 124   | 8.260134 | 124   | 14.92433 |
| 123.7999954 | 2.279800049 | 123.8999939 | 3.5143   | 124   | 5.8168 | 124.1 | 8.7681   | 124.1 | 14.354  | 123.8 | 2.447118 | 123.9 | 3.63788  | 124   | 5.879745 | 124.1 | 8.246313 | 124.1 | 14.90235 |
| 123.9000015 | 2.278399861 | 124         | 3.5083   | 124.1 | 5.8169 | 124.2 | 8.7634   | 124.2 | 14.3411 | 123.9 | 2.444402 | 124   | 3.632799 | 124.1 | 5.870716 | 124.2 | 8.232519 | 124.2 | 14.88041 |
| 123.9999924 | 2.278499727 | 124.0999908 | 3.508899 | 124.2 | 5.8176 | 124.3 | 8.7511   | 124.3 | 14.3269 | 124   | 2.44169  | 124.1 | 3.627726 | 124.2 | 5.861701 | 124.3 | 8.218753 | 124.3 | 14.8585  |
| 124.0999985 | 2.283899504 | 124.1999969 | 3.5089   | 124.3 | 5.8113 | 124.4 | 8.7427   | 124.4 | 14.3115 | 124.1 | 2.43898  | 124.2 | 3.62266  | 124.3 | 5.852704 | 124.4 | 8.205012 | 124.4 | 14.83664 |
| 124.2000046 | 2.285699989 | 124.3000031 | 3.5013   | 124.4 | 5.8014 | 124.5 | 8.7302   | 124.5 | 14.2932 | 124.2 | 2.436274 | 124.3 | 3.617602 | 124.4 | 5.84372  | 124.5 | 8.191299 | 124.5 | 14.81482 |
| 124.2999954 | 2.282199989 | 124.3999939 | 3.4973   | 124.5 | 5.7911 | 124.6 | 8.7225   | 124.6 | 14.2758 | 124.3 | 2.433571 | 124.4 | 3.612551 | 124.5 | 5.834753 | 124.6 | 8.177611 | 124.6 | 14.79303 |
| 124.4000015 | 2.283600042 | 124.5       | 3.4913   | 124.6 | 5.7864 | 124.7 | 8.7128   | 124.7 | 14.257  | 124.4 | 2.430871 | 124.5 | 3.607508 | 124.6 | 5.825799 | 124.7 | 8.163949 | 124.7 | 14.77129 |
| 124.4999924 | 2.27770016  | 124.5999908 | 3.4888   | 124.7 | 5.7827 | 124.8 | 8.7059   | 124.8 | 14.2452 | 124.5 | 2.428174 | 124.6 | 3.602472 | 124.7 | 5.816861 | 124.8 | 8.150315 | 124.8 | 14.74958 |
| 124.5999985 | 2.277999935 | 124.6999969 | 3.4839   | 124.8 | 5.7812 | 124.9 | 8.7014   | 124.9 | 14.2281 | 124.6 | 2.42548  | 124.7 | 3.597443 | 124.8 | 5.807939 | 124.9 | 8.136705 | 124.9 | 14.72792 |
| 124.7000046 | 2.275300174 | 124.8000031 | 3.485    | 124.9 | 5.7747 | 125   | 8.6978   | 125   | 14.2141 | 124.7 | 2.422789 | 124.8 | 3.592422 | 124.9 | 5.799035 | 125   | 8.123124 | 125   | 14.70629 |
| 124.7999954 | 2.277599866 | 124.8999939 | 3.4849   | 125   | 5.7686 | 125.1 | 8.6926   | 125.1 | 14.2021 | 124.8 | 2.420101 | 124.9 | 3.587408 | 125   | 5.790138 | 125.1 | 8.109566 | 125.1 | 14.68471 |
| 124.9000015 | 2.276999851 | 125         | 3.4882   | 125.1 | 5.7637 | 125.2 | 8.6808   | 125.2 | 14.1823 | 124.9 | 2.417416 | 125   | 3.582402 | 125.1 | 5.78126  | 125.2 | 8.096034 | 125.2 | 14.66316 |
| 124.9999924 | 2.278599733 | 125.0999908 | 3.4855   | 125.2 | 5.758  | 125.3 | 8.6713   | 125.3 | 14.1658 | 125.1 | 2.414735 | 125.1 | 3.577403 | 125.2 | 5.772396 | 125.3 | 8.08253  | 125.3 | 14.64165 |
| 125.0999985 | 2.282699833 | 125.1999969 | 3.4769   | 125.3 | 5.7532 | 125.4 | 8.6633   | 125.4 | 14.1484 | 125.2 | 2.412056 | 125.2 | 3.572411 | 125.3 | 5.763549 | 125.4 | 8.069051 | 125.4 | 14.62018 |
| 125.2000046 | 2.277200139 | 125.3000031 | 3.4784   | 125.4 | 5.745  | 125.5 | 8.6546   | 125.5 | 14.1313 | 125.2 | 2.40938  | 125.3 | 3.567427 | 125.4 | 5.754715 | 125.5 | 8.055598 | 125.5 | 14.59875 |
| 125.2999954 | 2.275699859 | 125.3999939 | 3.4756   | 125.5 | 5.7374 | 125.6 | 8.6497   | 125.6 | 14.1118 | 125.3 | 2.406708 | 125.4 | 3.56245  | 125.5 | 5.745897 | 125.6 | 8.04217  | 125.6 | 14.57736 |
| 125.4000015 | 2.276700011 | 125.5       | 3.475    | 125.6 | 5.7325 | 125.7 | 8.6411   | 125.7 | 14.098  | 125.4 | 2.404038 | 125.5 | 3.557481 | 125.6 | 5.737093 | 125.7 | 8.028767 | 125.7 | 14.556   |
| 125.4999924 | 2.276999902 | 125.5999908 | 3.4737   | 125.7 | 5.7265 | 125.8 | 8.6347   | 125.8 | 14.0855 | 125.5 | 2.401372 | 125.6 | 3.552518 | 125.7 | 5.728304 | 125.8 | 8.015392 | 125.8 | 14.53469 |
| 125.5999985 | 2.280799807 | 125.6999969 | 3.4764   | 125.8 | 5.7236 | 125.9 | 8.628    | 125.9 | 14.0671 | 125.6 | 2.398709 | 125.7 | 3.547653 | 125.8 | 5.719531 | 125.9 | 8.00204  | 125.9 | 14.51341 |
| 125.7000046 | 2.281500057 | 125.8000031 | 3.4724   | 125.9 | 5.718  | 126   | 8.6184   | 126   | 14.0476 | 125.7 | 2.396048 | 125.8 | 3.542616 | 125.9 | 5.710771 | 126   | 7.987716 | 126   | 14.49218 |
| 125.7999954 | 2.280199908 | 125.8999939 | 3.4684   | 126   | 5.7122 | 126.1 | 8.6088   | 126.1 | 14.0283 | 125.8 | 2.393391 | 125.9 | 3.537675 | 126   | 5.702027 | 126.1 | 7.975416 | 126.1 | 14.47098 |
| 125.9000015 | 2.277699948 | 126         | 3.461    | 126.1 | 5.7005 | 126.2 | 8.6007   | 126.2 | 14.0098 | 125.9 | 2.390737 | 126   | 3.532742 | 126.1 | 5.693297 | 126.2 | 7.962124 | 126.2 | 14.44981 |
| 125.9999924 | 2.275700064 | 126.0999908 | 3.4584   | 126.2 | 5.6923 | 126.3 | 8.5938   | 126.3 | 13.9955 | 126   | 2.388086 | 126.1 | 3.527816 | 126.2 | 5.684851 | 126.3 | 7.948892 | 126.3 | 14.42869 |
| 126.0999985 | 2.272000195 | 126.1999969 | 3.455    | 126.3 | 5.6899 | 126.4 | 8.5865   | 126.4 | 13.9852 | 126.1 | 2.385417 | 126.2 | 3.522897 | 126.3 | 5.675881 | 126.4 | 7.935667 | 126.4 | 14.4076  |
| 126.2000046 | 2.267400092 | 126.3000031 | 3.4552   | 126.4 | 5.6868 | 126.5 | 8.5783   | 126.5 | 13.97   | 126.2 | 2.382792 | 126.3 | 3.517986 | 126.4 | 5.667195 | 126.5 | 7.92247  | 126.5 | 14.38656 |
| 126.2999954 | 2.266399917 | 126.3999939 | 3.4563   | 126.5 | 5.6835 | 126.6 | 8.5694   | 126.6 | 13.956  | 126.3 | 2.380115 | 126.4 | 3.513081 | 126.5 | 5.658524 | 126.6 | 7.909295 | 126.6 | 14.36555 |
| 126.4000015 | 2.263199868 | 126.5       | 3.452    | 126.6 | 5.68   | 126.7 | 8.5607   | 126.7 | 13.9454 | 126.4 | 2.377511 | 126.5 | 3.508184 | 126.6 | 5.649867 | 126.7 | 7.896145 | 126.7 | 14.34457 |
| 126.4999924 | 2.258699961 | 126.5999908 | 3.4428   | 126.7 | 5.6772 | 126.8 | 8.5507   | 126.8 | 13.9317 | 126.5 | 2.374875 | 126.6 | 3.503294 | 126.7 | 5.641224 | 126.8 | 7.883023 | 126.8 | 14.32364 |
| 126.5999985 | 2.257099922 | 126.6999969 | 3.4374   | 126.8 | 5.6729 | 126.9 | 8.5474   | 126.9 | 13.9155 | 126.6 | 2.372242 | 126.7 | 3.498411 | 126.8 | 5.632596 | 126.9 | 7.870329 | 126.9 | 14.30274 |
| 126.7000046 | 2.256700068 | 126.8000031 | 3.4344   | 126.9 | 5.6657 | 127   | 8.5407   | 127   | 13.8998 | 126.7 | 2.369611 | 126.8 | 3.493536 | 126.9 | 5.623982 | 127   | 7.856851 | 127   | 14.28189 |
| 126.7999954 | 2.254599919 | 126.8999939 | 3.4335   | 127   | 5.6636 | 127.1 | 8.5333   | 127.1 | 13.8866 | 126.8 | 2.366984 | 126.9 | 3.488667 | 127   | 5.615384 | 127.1 | 7.843801 | 127.1 | 14.26106 |
| 126.9000015 | 2.252999949 | 127         | 3.4306   | 127.1 | 5.6566 | 127.2 | 8.5256   | 127.2 | 13.872  | 126.9 | 2.36436  | 127   | 3.483807 | 127.1 | 5.606798 | 127.2 | 7.830775 | 127.2 | 14.24028 |
| 126.9999924 | 2.250899893 | 127.0999908 | 3.4302   | 127.2 | 5.6516 | 127.3 | 8.5149   | 127.3 | 13.8542 | 127   | 2.361739 | 127.1 |          |       |          |       |          |       |          |

|             |             |            |          |       |        |       |          |       |         |       |          |       |          |       |          |       |          |       |          |
|-------------|-------------|------------|----------|-------|--------|-------|----------|-------|---------|-------|----------|-------|----------|-------|----------|-------|----------|-------|----------|
| 133.999939  | 2.155499762 | 133.5      | 3.3141   | 133.6 | 5.3672 | 133.7 | 8.033901 | 133.7 | 13.0038 | 133.4 | 2.200049 | 133.5 | 3.182613 | 133.6 | 5.078333 | 133.7 | 7.034615 | 133.7 | 12.96502 |
| 133.5       | 2.153700024 | 133.599908 | 3.3109   | 133.7 | 5.3632 | 133.8 | 8.031399 | 133.8 | 12.9969 | 133.5 | 2.197615 | 133.6 | 3.178199 | 133.7 | 5.070638 | 133.8 | 7.023106 | 133.8 | 12.94651 |
| 133.600061  | 2.153300021 | 133.699969 | 3.3111   | 133.8 | 5.3641 | 133.9 | 8.0284   | 133.9 | 12.986  | 133.6 | 2.195183 | 133.7 | 3.173791 | 133.8 | 5.062957 | 133.9 | 7.011615 | 133.9 | 12.92802 |
| 133.7000122 | 2.151900767 | 133.800031 | 3.3126   | 133.9 | 5.3543 | 134   | 8.0223   | 134   | 12.9747 | 133.7 | 2.192755 | 133.8 | 3.169391 | 133.9 | 5.055287 | 134   | 7.000145 | 134   | 12.90957 |
| 133.7999878 | 2.159099229 | 133.899939 | 3.3114   | 134   | 5.35   | 134.1 | 8.0129   | 134.1 | 12.961  | 133.8 | 2.190329 | 133.9 | 3.164995 | 134   | 5.04763  | 134.1 | 6.988695 | 134.1 | 12.89115 |
| 133.899939  | 2.161999505 | 134        | 3.3118   | 134.1 | 5.3446 | 134.2 | 8.0076   | 134.2 | 12.9458 | 133.9 | 2.187906 | 134   | 3.160606 | 134.1 | 5.039985 | 134.2 | 6.977267 | 134.2 | 12.87276 |
| 134         | 2.159800009 | 134.099908 | 3.3093   | 134.2 | 5.3414 | 134.3 | 8.0032   | 134.3 | 12.9363 | 134   | 2.185486 | 134.1 | 3.156224 | 134.2 | 5.032353 | 134.3 | 6.965864 | 134.3 | 12.85441 |
| 134.100061  | 2.158200012 | 134.199969 | 3.3091   | 134.3 | 5.3362 | 134.4 | 7.9954   | 134.4 | 12.9255 | 134.1 | 2.183068 | 134.2 | 3.151848 | 134.3 | 5.024735 | 134.4 | 6.954478 | 134.4 | 12.83608 |
| 134.2000122 | 2.154800231 | 134.300031 | 3.3087   | 134.4 | 5.3346 | 134.5 | 7.9886   | 134.5 | 12.9157 | 134.2 | 2.180653 | 134.3 | 3.147479 | 134.4 | 5.017128 | 134.5 | 6.943113 | 134.5 | 12.81779 |
| 134.2999878 | 2.155399738 | 134.399939 | 3.308    | 134.5 | 5.3339 | 134.6 | 7.9844   | 134.6 | 12.9047 | 134.3 | 2.178241 | 134.4 | 3.143116 | 134.5 | 5.009533 | 134.6 | 6.931768 | 134.6 | 12.79953 |
| 134.3999939 | 2.159299659 | 134.5      | 3.3053   | 134.6 | 5.3352 | 134.7 | 7.9773   | 134.7 | 12.8926 | 134.4 | 2.175832 | 134.5 | 3.138759 | 134.6 | 5.001951 | 134.7 | 6.920445 | 134.7 | 12.7813  |
| 134.5       | 2.164400014 | 134.599908 | 3.303299 | 134.7 | 5.3341 | 134.8 | 7.973    | 134.8 | 12.8815 | 134.5 | 2.173425 | 134.6 | 3.134408 | 134.7 | 4.994381 | 134.8 | 6.909146 | 134.8 | 12.7631  |
| 134.600061  | 2.165799989 | 134.699969 | 3.3007   | 134.8 | 5.3299 | 134.9 | 7.9643   | 134.9 | 12.8693 | 134.6 | 2.171021 | 134.7 | 3.130064 | 134.8 | 4.986285 | 134.9 | 6.897864 | 134.9 | 12.74493 |
| 134.7000122 | 2.165300348 | 134.800031 | 3.2976   | 134.9 | 5.3215 | 135   | 7.959    | 135   | 12.8577 | 134.7 | 2.16862  | 134.8 | 3.125727 | 134.9 | 4.97928  | 135   | 6.886602 | 135   | 12.72679 |
| 134.7999878 | 2.165899656 | 134.899939 | 3.2943   | 135   | 5.3229 | 135.1 | 7.9539   | 135.1 | 12.8427 | 134.8 | 2.166222 | 134.9 | 3.121395 | 135   | 4.971747 | 135.1 | 6.875362 | 135.1 | 12.70868 |
| 134.899939  | 2.16420012  | 135        | 3.2904   | 135.1 | 5.3193 | 135.2 | 7.948901 | 135.2 | 12.828  | 134.9 | 2.163826 | 135   | 3.117069 | 135.1 | 4.964227 | 135.2 | 6.864142 | 135.2 | 12.69061 |
| 135         | 2.166700015 | 135.099908 | 3.2903   | 135.2 | 5.3136 | 135.3 | 7.947299 | 135.3 | 12.8164 | 135   | 2.161433 | 135.1 | 3.11275  | 135.2 | 4.956719 | 135.3 | 6.852946 | 135.3 | 12.67257 |
| 135.100061  | 2.165699989 | 135.199969 | 3.2888   | 135.3 | 5.3144 | 135.4 | 7.9392   | 135.4 | 12.8048 | 135.1 | 2.159042 | 135.2 | 3.108437 | 135.3 | 4.949225 | 135.4 | 6.841767 | 135.4 | 12.65455 |
| 135.2000122 | 2.164400576 | 135.300031 | 3.2883   | 135.4 | 5.3083 | 135.5 | 7.9307   | 135.5 | 12.7908 | 135.2 | 2.156655 | 135.3 | 3.104132 | 135.4 | 4.941741 | 135.5 | 6.830608 | 135.5 | 12.63657 |
| 135.2999878 | 2.168599418 | 135.399939 | 3.2843   | 135.5 | 5.2995 | 135.6 | 7.9226   | 135.6 | 12.7776 | 135.3 | 2.15427  | 135.4 | 3.099831 | 135.5 | 4.93427  | 135.6 | 6.81947  | 135.6 | 12.61861 |
| 135.3999939 | 2.166199998 | 135.5      | 3.2776   | 135.6 | 5.2925 | 135.7 | 7.915701 | 135.7 | 12.7652 | 135.4 | 2.151888 | 135.5 | 3.095537 | 135.6 | 4.926811 | 135.7 | 6.808352 | 135.7 | 12.60069 |
| 135.5       | 2.160399994 | 135.599908 | 3.2729   | 135.7 | 5.2853 | 135.8 | 7.913099 | 135.8 | 12.7579 | 135.5 | 2.149508 | 135.6 | 3.091249 | 135.7 | 4.919364 | 135.8 | 6.797258 | 135.8 | 12.5828  |
| 135.600061  | 2.156599984 | 135.699969 | 3.2706   | 135.8 | 5.2854 | 135.9 | 7.9014   | 135.9 | 12.7464 | 135.6 | 2.147131 | 135.7 | 3.086967 | 135.8 | 4.911931 | 135.9 | 6.786181 | 135.9 | 12.56494 |
| 135.7000122 | 2.152300937 | 135.800031 | 3.2721   | 135.9 | 5.2834 | 136   | 7.8932   | 136   | 12.7347 | 135.7 | 2.144757 | 135.8 | 3.082693 | 135.9 | 4.904508 | 136   | 6.775124 | 136   | 12.54711 |
| 135.7999878 | 2.154999045 | 135.899939 | 3.2675   | 136   | 5.279  | 136.1 | 7.8838   | 136.1 | 12.7196 | 135.8 | 2.142386 | 135.9 | 3.078423 | 136   | 4.897098 | 136.1 | 6.764088 | 136.1 | 12.5293  |
| 135.899939  | 2.154800069 | 136        | 3.2637   | 136.1 | 5.2721 | 136.2 | 7.8689   | 136.2 | 12.7021 | 135.9 | 2.140018 | 136   | 3.07416  | 136.1 | 4.889699 | 136.2 | 6.753071 | 136.2 | 12.51153 |
| 136         | 2.152500029 | 136.099908 | 3.2631   | 136.2 | 5.265  | 136.3 | 7.8686   | 136.3 | 12.6904 | 136   | 2.137651 | 136.1 | 3.069903 | 136.2 | 4.882313 | 136.3 | 6.742078 | 136.3 | 12.49379 |
| 136.100061  | 2.151500005 | 136.199969 | 3.2562   | 136.3 | 5.2582 | 136.4 | 7.8647   | 136.4 | 12.6768 | 136.1 | 2.135288 | 136.2 | 3.065652 | 136.3 | 4.874941 | 136.4 | 6.731101 | 136.4 | 12.47608 |
| 136.2000122 | 2.149000103 | 136.300031 | 3.2555   | 136.4 | 5.253  | 136.5 | 7.8583   | 136.5 | 12.6637 | 136.2 | 2.132927 | 136.3 | 3.061409 | 136.4 | 4.867579 | 136.5 | 6.720145 | 136.5 | 12.4584  |
| 136.2999878 | 2.146999922 | 136.399939 | 3.2547   | 136.5 | 5.2466 | 136.6 | 7.8568   | 136.6 | 12.6526 | 136.3 | 2.13057  | 136.4 | 3.05717  | 136.5 | 4.860228 | 136.6 | 6.709208 | 136.6 | 12.44075 |
| 136.399939  | 2.14699977  | 136.5      | 3.255    | 136.6 | 5.2429 | 136.7 | 7.8544   | 136.7 | 12.6445 | 136.4 | 2.128214 | 136.5 | 3.052937 | 136.6 | 4.852829 | 136.7 | 6.698292 | 136.7 | 12.42313 |
| 136.5       | 2.143500012 | 136.599908 | 3.256199 | 136.7 | 5.2395 | 136.8 | 7.8517   | 136.8 | 12.6321 | 136.5 | 2.125862 | 136.6 | 3.048711 | 136.7 | 4.845564 | 136.8 | 6.687399 | 136.8 | 12.40554 |
| 136.600061  | 2.145099984 | 136.699969 | 3.2617   | 136.8 | 5.2369 | 136.9 | 7.8476   | 136.9 | 12.6205 | 136.6 | 2.123512 | 136.7 | 3.044491 | 136.8 | 4.838252 | 136.9 | 6.676522 | 136.9 | 12.38797 |
| 136.7000122 | 2.143400154 | 136.800031 | 3.2624   | 136.9 | 5.2332 | 137   | 7.8452   | 137   | 12.6066 | 136.7 | 2.121164 | 136.8 | 3.040278 | 136.9 | 4.830949 | 137   | 6.665665 | 137   | 12.37044 |
| 136.7999878 | 2.139299817 | 136.899939 | 3.2634   | 137   | 5.2289 | 137.1 | 7.8398   | 137.1 | 12.5954 | 136.8 | 2.11882  | 136.9 | 3.03607  | 137   | 4.823659 | 137.1 | 6.654827 | 137.1 | 12.35294 |
| 136.899939  | 2.140199636 | 137        | 3.2607   | 137.1 | 5.2282 | 137.2 | 7.8343   | 137.2 | 12.5855 | 136.9 | 2.116478 | 137   | 3.031868 | 137.1 | 4.81638  | 137.2 | 6.64401  | 137.2 | 12.33546 |
| 137         | 2.142099994 | 137.099908 | 3.2597   | 137.2 | 5.2269 | 137.3 | 7.8303   | 137.3 | 12.5735 | 137   | 2.114138 | 137.1 | 3.027672 | 137.2 | 4.809113 | 137.3 | 6.632125 | 137.3 | 12.31802 |
| 137.100061  | 2.143800001 | 137.199969 | 3.258    | 137.3 | 5.2203 | 137.4 | 7.819401 | 137.4 | 12.5569 | 137.2 | 2.111802 | 137.2 | 3.023843 | 137.3 | 4.80186  | 137.4 | 6.622437 | 137.4 | 12.30061 |
| 137.2000122 | 2.146100055 | 137.300031 | 3.256    | 137.4 | 5.2144 | 137.5 | 7.8122   | 137.5 | 12.5454 | 137.2 | 2.109468 | 137.3 | 3.0193   | 137.4 | 4.794617 | 137.5 | 6.611678 | 137.5 | 12.28322 |
| 137.2999878 | 2.142099942 | 137.399939 | 3.249901 | 137.5 | 5.2085 | 137.6 | 7.805    | 137.6 | 12.5301 | 137.3 | 2.107137 | 137.4 | 3.015123 | 137.5 | 4.787386 | 137.6 | 6.600939 | 137.6 | 12.26587 |
| 137.399939  | 2.134100554 | 137.5      | 3.2484   | 137.6 | 5.2058 | 137.7 | 7.803701 | 137.7 | 12.5206 | 137.4 | 2.104808 | 137.5 | 3.010951 | 137.6 | 4.780166 | 137.7 | 6.590219 | 137.7 | 12.24854 |
| 137.5       | 2.130000028 | 137.599908 | 3.2479   | 137.7 | 5.2072 | 137.8 | 7.803099 | 137.8 | 12.5123 | 137.5 | 2.102482 | 137.6 | 3.006786 | 137.7 | 4.772598 | 137.8 | 6.579522 | 137.8 | 12.23124 |
| 137.600061  | 2.126100011 | 137.699969 | 3.2481   | 137.8 | 5.2034 | 137.9 | 7.802199 | 137.9 | 12.5058 | 137.7 | 2.100158 | 137.7 | 3.002626 | 137.8 | 4.765764 | 137.9 | 6.568841 | 137.9 | 12.21397 |
| 137.7000122 | 2.127800582 | 137.800031 | 3.2513   | 137.9 | 5.1997 | 138   | 7.7957   | 138   | 12.4921 | 137.7 | 2.097837 | 137.8 | 2.998474 | 137.9 | 4.75858  | 138   | 6.558179 | 138   | 12.19673 |
| 137.7999878 | 2.127699425 | 137.899939 | 3.254399 | 138   | 5.194  | 138.1 | 7.7883   | 138.1 | 12.477  | 137.8 | 2.095519 | 137.9 | 2.994326 | 138   | 4.751407 | 138.1 | 6.547537 | 138.1 | 12.17952 |
| 137.899939  | 2.132999215 | 138        | 3.2527   | 138.1 | 5.187  | 138.2 | 7.7825   | 138.2 | 12.468  | 137.9 | 2.093204 | 138   | 2.990185 | 138   | 4.744246 | 138.2 | 6.536914 | 138.2 | 12.16234 |
| 138         | 2.135300009 | 138.099908 | 3.2487   | 138.2 | 5.185  | 138.3 | 7.7712   | 138.3 | 12.4541 | 138   | 2.090891 | 138.1 | 2.986049 | 138.2 | 4.737096 | 138.3 | 6.526313 | 138.3 | 12.14519 |
| 138.100061  | 2.133599972 | 138.199969 | 3.2481   | 138.3 | 5.1785 | 138.4 | 7.7638   | 138.4 | 12.4424 | 138.1 | 2.08858  | 138.2 | 2.98192  | 138.3 | 4.72996  | 138.4 | 6.515729 | 138.4 | 12.12806 |
| 138.2000122 | 2.134599798 | 138.300031 | 3.2434   | 138.4 | 5.1753 | 138.5 | 7.7541   | 138.5 | 12.4258 | 138.2 | 2.086272 | 138.3 | 2.977797 | 138.4 | 4.722834 | 138.5 | 6.505163 | 138.5 | 12.11097 |
| 138.2999878 | 2.133000221 | 138.399939 | 3.2424   | 138.5 | 5.1689 | 138.6 | 7.7471   | 138.6 | 12.4136 | 138.3 | 2.083968 | 138.4 | 2.97368  | 138.5 | 4.715719 | 138.6 | 6.494617 | 138.6 | 12.0939  |
| 138.399939  | 2.128499824 | 138.5      | 3.2381   | 138.6 | 5.1689 | 138.7 | 7.7412   | 138.7 | 12.4034 | 138.4 | 2.081665 | 138.5 | 2.969568 | 138.6 | 4.708616 | 138.7 | 6.48409  | 138.7 | 12.07686 |
| 138.5       | 2.123299989 | 138.599908 | 3.2378   | 138.7 | 5.1653 | 138.8 | 7.7386   | 138.8 | 12.397  | 138.5 | 2.079365 | 138.6 | 2.965462 | 138.7 | 4.701525 | 138.8 | 6.473585 | 138.8 | 12.05985 |
| 138.600061  | 2.121799    |            |          |       |        |       |          |       |         |       |          |       |          |       |          |       |          |       |          |

|             |             |            |          |       |        |       |          |       |         |       |          |       |          |       |          |       |          |       |          |
|-------------|-------------|------------|----------|-------|--------|-------|----------|-------|---------|-------|----------|-------|----------|-------|----------|-------|----------|-------|----------|
| 144.8999939 | 2.07889273  | 145        | 3.1477   | 145.1 | 4.9916 | 145.2 | 7.3541   | 145.2 | 11.6939 | 144.9 | 1.937459 | 145   | 2.714651 | 145.1 | 4.270717 | 145.2 | 5.83884  | 145.2 | 11.02767 |
| 145         | 2.08199973  | 145.099908 | 3.150599 | 145.2 | 4.9892 | 145.3 | 7.3503   | 145.3 | 11.6854 | 145.1 | 1.935222 | 145.1 | 2.710912 | 145.2 | 4.264331 | 145.3 | 5.829487 | 145.3 | 11.01239 |
| 145.1000061 | 2.08300027  | 145.199969 | 3.1513   | 145.3 | 4.9863 | 145.4 | 7.3457   | 145.4 | 11.6745 | 145.1 | 1.933187 | 145.2 | 2.707178 | 145.3 | 4.257957 | 145.4 | 5.820148 | 145.4 | 10.99713 |
| 145.2000122 | 2.082400415 | 145.300031 | 3.1495   | 145.4 | 4.9796 | 145.5 | 7.3399   | 145.5 | 11.6619 | 145.2 | 1.931055 | 145.3 | 2.703451 | 145.4 | 4.251591 | 145.5 | 5.810255 | 145.5 | 10.98189 |
| 145.2999878 | 2.08099558  | 145.399939 | 3.1425   | 145.5 | 4.9743 | 145.6 | 7.3357   | 145.6 | 11.6564 | 145.3 | 1.928926 | 145.4 | 2.699729 | 145.5 | 4.245235 | 145.6 | 5.801519 | 145.6 | 10.96668 |
| 145.3999939 | 2.080500204 | 145.5      | 3.1371   | 145.6 | 4.9701 | 145.7 | 7.3294   | 145.7 | 11.6465 | 145.4 | 1.926799 | 145.5 | 2.696011 | 145.6 | 4.23889  | 145.7 | 5.792229 | 145.7 | 10.95149 |
| 145.5       | 2.078399972 | 145.599908 | 3.136399 | 145.7 | 4.9653 | 145.8 | 7.3241   | 145.8 | 11.6341 | 145.5 | 1.924674 | 145.6 | 2.692299 | 145.7 | 4.232555 | 145.8 | 5.782958 | 145.8 | 10.93633 |
| 145.6000061 | 2.08149998  | 145.699969 | 3.132    | 145.8 | 4.9586 | 145.9 | 7.3194   | 145.9 | 11.6255 | 145.6 | 1.922551 | 145.7 | 2.688592 | 145.8 | 4.226231 | 145.9 | 5.773701 | 145.9 | 10.92119 |
| 145.7000122 | 2.084199739 | 145.800031 | 3.1261   | 145.9 | 4.9571 | 146   | 7.3129   | 146   | 11.6132 | 145.7 | 1.920431 | 145.8 | 2.684892 | 145.9 | 4.219916 | 146   | 5.76446  | 146   | 10.90608 |
| 145.7999878 | 2.080200248 | 145.899939 | 3.1215   | 146   | 4.9517 | 146.1 | 7.3111   | 146.1 | 11.6023 | 145.8 | 1.918314 | 145.9 | 2.681195 | 146   | 4.213611 | 146.1 | 5.755236 | 146.1 | 10.89099 |
| 145.8999939 | 2.076899967 | 146        | 3.1177   | 146.1 | 4.9483 | 146.2 | 7.3045   | 146.2 | 11.5849 | 145.9 | 1.916199 | 146   | 2.677504 | 146.1 | 4.207317 | 146.2 | 5.746027 | 146.2 | 10.87592 |
| 146         | 2.075700026 | 146.099908 | 3.1172   | 146.2 | 4.9411 | 146.3 | 7.2951   | 146.3 | 11.573  | 146   | 1.914086 | 146.1 | 2.673819 | 146.2 | 4.201032 | 146.3 | 5.736838 | 146.3 | 10.86089 |
| 146.1000061 | 2.075099993 | 146.199969 | 3.1126   | 146.3 | 4.9329 | 146.4 | 7.2939   | 146.4 | 11.5623 | 146.1 | 1.911975 | 146.2 | 2.670138 | 146.3 | 4.194759 | 146.4 | 5.727662 | 146.4 | 10.84587 |
| 146.2000122 | 2.069199701 | 146.300031 | 3.1072   | 146.4 | 4.9269 | 146.5 | 7.2915   | 146.5 | 11.5503 | 146.2 | 1.909867 | 146.3 | 2.666464 | 146.4 | 4.188494 | 146.5 | 5.718502 | 146.5 | 10.83087 |
| 146.2999878 | 2.066400306 | 146.399939 | 3.1071   | 146.5 | 4.9252 | 146.6 | 7.2903   | 146.6 | 11.5423 | 146.3 | 1.907762 | 146.4 | 2.662794 | 146.5 | 4.182239 | 146.6 | 5.709359 | 146.6 | 10.8159  |
| 146.3999939 | 2.064699833 | 146.5      | 3.1071   | 146.6 | 4.9231 | 146.7 | 7.2862   | 146.7 | 11.5338 | 146.4 | 1.905658 | 146.5 | 2.65913  | 146.6 | 4.175994 | 146.7 | 5.700231 | 146.7 | 10.80096 |
| 146.5       | 2.068400009 | 146.599908 | 3.1073   | 146.7 | 4.9179 | 146.8 | 7.2835   | 146.8 | 11.523  | 146.5 | 1.903557 | 146.6 | 2.654547 | 146.7 | 4.16976  | 146.8 | 5.691122 | 146.8 | 10.78604 |
| 146.6000061 | 2.07189987  | 146.699969 | 3.1071   | 146.8 | 4.9125 | 146.9 | 7.2787   | 146.9 | 11.513  | 146.6 | 1.901459 | 146.7 | 2.651816 | 146.8 | 4.163537 | 146.9 | 5.682027 | 146.9 | 10.77115 |
| 146.7000122 | 2.071600276 | 146.800031 | 3.1037   | 146.9 | 4.9081 | 147   | 7.2722   | 147   | 11.5054 | 146.7 | 1.899362 | 146.8 | 2.648168 | 146.9 | 4.157322 | 147   | 5.672947 | 147   | 10.75627 |
| 146.7999878 | 2.07159974  | 146.899939 | 3.1013   | 147   | 4.9043 | 147.1 | 7.2708   | 147.1 | 11.495  | 146.8 | 1.897269 | 146.9 | 2.644525 | 147   | 4.151116 | 147.1 | 5.663884 | 147.1 | 10.74142 |
| 146.8999939 | 2.069000031 | 147        | 3.099    | 147.1 | 4.9054 | 147.2 | 7.2653   | 147.2 | 11.4863 | 146.9 | 1.895177 | 147   | 2.640886 | 147.1 | 4.144921 | 147.2 | 5.654836 | 147.2 | 10.7266  |
| 147         | 2.067899985 | 147.099908 | 3.0977   | 147.2 | 4.905  | 147.3 | 7.2613   | 147.3 | 11.4767 | 147   | 1.893088 | 147.1 | 2.637253 | 147.2 | 4.138736 | 147.3 | 5.645807 | 147.3 | 10.7118  |
| 147.1000061 | 2.067000012 | 147.199969 | 3.0987   | 147.3 | 4.9044 | 147.4 | 7.2583   | 147.4 | 11.4649 | 147.1 | 1.891001 | 147.2 | 2.633265 | 147.3 | 4.132562 | 147.4 | 5.636791 | 147.4 | 10.69702 |
| 147.2000122 | 2.068800327 | 147.300031 | 3.098    | 147.4 | 4.8985 | 147.5 | 7.2522   | 147.5 | 11.4531 | 147.2 | 1.888917 | 147.3 | 2.630003 | 147.4 | 4.126397 | 147.5 | 5.627791 | 147.5 | 10.68227 |
| 147.2999878 | 2.067599636 | 147.399939 | 3.0961   | 147.5 | 4.8925 | 147.6 | 7.2494   | 147.6 | 11.4461 | 147.3 | 1.886835 | 147.4 | 2.626385 | 147.5 | 4.120241 | 147.6 | 5.618806 | 147.6 | 10.66754 |
| 147.3999939 | 2.065399941 | 147.5      | 3.0947   | 147.6 | 4.889  | 147.7 | 7.2412   | 147.7 | 11.4339 | 147.4 | 1.884755 | 147.5 | 2.622773 | 147.6 | 4.114095 | 147.7 | 5.609838 | 147.7 | 10.65283 |
| 147.5       | 2.065200021 | 147.599908 | 3.0929   | 147.7 | 4.8816 | 147.8 | 7.2333   | 147.8 | 11.4211 | 147.5 | 1.882678 | 147.6 | 2.619166 | 147.7 | 4.107959 | 147.8 | 5.600888 | 147.8 | 10.63815 |
| 147.6000061 | 2.064000005 | 147.699969 | 3.09     | 147.8 | 4.8759 | 147.9 | 7.22899  | 147.9 | 11.4129 | 147.6 | 1.880602 | 147.7 | 2.615653 | 147.8 | 4.101834 | 147.9 | 5.59195  | 147.9 | 10.62349 |
| 147.7000122 | 2.061399988 | 147.800031 | 3.0887   | 147.9 | 4.8755 | 148   | 7.2286   | 148   | 11.3991 | 147.7 | 1.87853  | 147.8 | 2.611967 | 147.9 | 4.095717 | 148   | 5.583029 | 148   | 10.60885 |
| 147.7999878 | 2.061900096 | 147.899939 | 3.091299 | 148   | 4.8721 | 148.1 | 7.2232   | 148.1 | 11.3889 | 147.8 | 1.87646  | 147.9 | 2.608375 | 148   | 4.08961  | 148.1 | 5.574123 | 148.1 | 10.59424 |
| 147.8999939 | 2.063499432 | 148        | 3.0854   | 148.1 | 4.8668 | 148.2 | 7.2192   | 148.2 | 11.3816 | 147.9 | 1.874392 | 148   | 2.604789 | 148.1 | 4.083513 | 148.2 | 5.565232 | 148.2 | 10.57965 |
| 148         | 2.061399998 | 148.099908 | 3.0837   | 148.2 | 4.8646 | 148.3 | 7.2141   | 148.3 | 11.3724 | 148   | 1.872326 | 148.1 | 2.601207 | 148.2 | 4.077425 | 148.3 | 5.55636  | 148.3 | 10.56509 |
| 148.1000061 | 2.061500005 | 148.199969 | 3.082    | 148.3 | 4.8598 | 148.4 | 7.2073   | 148.4 | 11.3641 | 148.1 | 1.870262 | 148.2 | 2.59763  | 148.3 | 4.071349 | 148.4 | 5.547501 | 148.4 | 10.55054 |
| 148.2000122 | 2.062700045 | 148.300031 | 3.0791   | 148.4 | 4.8573 | 148.5 | 7.2051   | 148.5 | 11.3561 | 148.2 | 1.868201 | 148.3 | 2.59406  | 148.4 | 4.065281 | 148.5 | 5.538657 | 148.5 | 10.53602 |
| 148.2999878 | 2.061299959 | 148.399939 | 3.0774   | 148.5 | 4.854  | 148.6 | 7.2024   | 148.6 | 11.3491 | 148.3 | 1.866143 | 148.4 | 2.590494 | 148.5 | 4.059222 | 148.6 | 5.529829 | 148.6 | 10.52152 |
| 148.3999939 | 2.06079988  | 148.5      | 3.0791   | 148.6 | 4.8548 | 148.7 | 7.1998   | 148.7 | 11.3376 | 148.4 | 1.864086 | 148.5 | 2.586933 | 148.6 | 4.053173 | 148.7 | 5.521016 | 148.7 | 10.50705 |
| 148.5       | 2.066299981 | 148.599908 | 3.0818   | 148.7 | 4.8505 | 148.8 | 7.1958   | 148.8 | 11.3283 | 148.5 | 1.862032 | 148.6 | 2.583376 | 148.7 | 4.047134 | 148.8 | 5.512221 | 148.8 | 10.4926  |
| 148.6000061 | 2.071199985 | 148.699969 | 3.08     | 148.8 | 4.8454 | 148.9 | 7.1927   | 148.9 | 11.3174 | 148.6 | 1.85998  | 148.7 | 2.579825 | 148.8 | 4.041106 | 148.9 | 5.503439 | 148.9 | 10.47818 |
| 148.7000122 | 2.071800406 | 148.800031 | 3.0776   | 148.9 | 4.844  | 149   | 7.1895   | 149   | 11.3092 | 148.7 | 1.857931 | 148.8 | 2.57628  | 148.9 | 4.035086 | 149   | 5.494672 | 149   | 10.46377 |
| 148.7999878 | 2.073399559 | 148.899939 | 3.0765   | 149   | 4.8433 | 149.1 | 7.182    | 149.1 | 11.2994 | 148.8 | 1.855884 | 148.9 | 2.572739 | 149   | 4.029075 | 149.1 | 5.48592  | 149.1 | 10.44939 |
| 148.8999939 | 2.07599967  | 149        | 3.0744   | 149.1 | 4.8392 | 149.2 | 7.1791   | 149.2 | 11.29   | 148.9 | 1.853839 | 149   | 2.569204 | 149.1 | 4.023074 | 149.2 | 5.477184 | 149.2 | 10.43503 |
| 149         | 2.078599989 | 149.099908 | 3.068    | 149.2 | 4.8371 | 149.3 | 7.1761   | 149.3 | 11.2799 | 149   | 1.851796 | 149.1 | 2.565673 | 149.2 | 4.017082 | 149.3 | 5.468465 | 149.3 | 10.4207  |
| 149.1000061 | 2.077499986 | 149.199969 | 3.0651   | 149.3 | 4.8347 | 149.4 | 7.1688   | 149.4 | 11.269  | 149.1 | 1.849756 | 149.2 | 2.562147 | 149.3 | 4.011102 | 149.4 | 5.45976  | 149.4 | 10.40638 |
| 149.2000122 | 2.078300112 | 149.300031 | 3.0611   | 149.4 | 4.832  | 149.5 | 7.1678   | 149.5 | 11.2591 | 149.2 | 1.847718 | 149.3 | 2.558627 | 149.4 | 4.005129 | 149.5 | 5.451069 | 149.5 | 10.39209 |
| 149.2999878 | 2.071499887 | 149.399939 | 3.0581   | 149.5 | 4.8304 | 149.6 | 7.1661   | 149.6 | 11.2525 | 149.3 | 1.845683 | 149.4 | 2.555111 | 149.5 | 3.999166 | 149.6 | 5.442393 | 149.6 | 10.37782 |
| 149.3999939 | 2.065299884 | 149.5      | 3.0574   | 149.6 | 4.8255 | 149.7 | 7.160801 | 149.7 | 11.2416 | 149.4 | 1.843649 | 149.5 | 2.551601 | 149.6 | 3.99212  | 149.7 | 5.433733 | 149.7 | 10.36358 |
| 149.5       | 2.063300027 | 149.599908 | 3.0586   | 149.7 | 4.8177 | 149.8 | 7.156999 | 149.8 | 11.2328 | 149.5 | 1.841618 | 149.6 | 2.548095 | 149.7 | 3.987268 | 149.8 | 5.42509  | 149.8 | 10.34936 |
| 149.6000061 | 2.059100015 | 149.699969 | 3.0526   | 149.8 | 4.8155 | 149.9 | 7.154099 | 149.9 | 11.223  | 149.6 | 1.839589 | 149.7 | 2.544594 | 149.8 | 3.981335 | 149.9 | 5.416466 | 149.9 | 10.33516 |
| 149.7000122 | 2.054600547 | 149.800031 | 3.0504   | 149.9 | 4.8173 | 150   | 7.1486   | 150   | 11.2155 | 149.7 | 1.837563 | 149.8 | 2.5411   | 149.9 | 3.97541  | 150   | 5.407845 | 150   | 10.32098 |
| 149.7999878 | 2.057999459 | 149.899939 | 3.046599 | 150   | 4.8175 | 150.1 | 7.1417   | 150.1 | 11.1993 | 149.8 | 1.835539 | 149.9 | 2.537609 | 150   | 3.969494 | 150.1 | 5.399244 | 150.1 | 10.30682 |
| 149.8999939 | 2.062299454 | 150        | 3.0451   | 150.1 | 4.8102 | 150.2 | 7.135    | 150.2 | 11.1844 | 149.9 | 1.833517 | 150   | 2.534123 | 150.1 | 3.963587 | 150.2 | 5.390659 | 150.2 | 10.29269 |
| 150         | 2.063800027 | 150.099908 | 3.0382   | 150.2 | 4.8043 | 150.3 | 7.1246   | 150.3 | 11.172  | 150   | 1.831497 | 150.1 | 2.530642 | 150.2 | 3.95769  | 150.3 | 5.382091 | 150.3 | 10.27858 |
| 150.1000061 | 2.058000003 |            |          |       |        |       |          |       |         |       |          |       |          |       |          |       |          |       |          |

|             |             |             |          |       |        |       |          |       |         |       |          |       |          |       |          |       |            |       |          |
|-------------|-------------|-------------|----------|-------|--------|-------|----------|-------|---------|-------|----------|-------|----------|-------|----------|-------|------------|-------|----------|
| 156.3999939 | 2.018499979 | 156.5       | 2.924    | 156.6 | 4.5971 | 156.7 | 6.7982   | 156.7 | 10.6314 | 156.4 | 1.706854 | 156.5 | 2.317883 | 156.6 | 3.599006 | 156.7 | 4.863327   | 156.7 | 9.420085 |
| 156.5       | 2.019799953 | 156.5999908 | 2.9222   | 156.7 | 4.5948 | 156.8 | 6.7917   | 156.8 | 10.6179 | 156.5 | 1.704976 | 156.6 | 2.314709 | 156.7 | 3.593863 | 156.8 | 4.855668   | 156.8 | 9.407341 |
| 156.6000061 | 2.015899973 | 156.6999969 | 2.9257   | 156.8 | 4.5898 | 156.9 | 6.7834   | 156.9 | 10.6084 | 156.6 | 1.703110 | 156.7 | 2.31154  | 156.8 | 3.588369 | 156.9 | 4.848019   | 156.9 | 9.394612 |
| 156.7000122 | 2.019099662 | 156.8000031 | 2.9219   | 156.9 | 4.5889 | 157   | 6.777    | 157   | 10.601  | 156.7 | 1.701228 | 156.8 | 2.308377 | 156.9 | 3.583063 | 157   | 4.840383   | 157   | 9.381903 |
| 156.7999878 | 2.017400281 | 156.8999939 | 2.921    | 157   | 4.5882 | 157.1 | 6.7711   | 157.1 | 10.5922 | 156.8 | 1.699357 | 156.9 | 2.305217 | 156.9 | 3.577764 | 157.1 | 4.83276    | 157.1 | 9.369214 |
| 156.8999939 | 2.014000042 | 157         | 2.9181   | 157.1 | 4.587  | 157.2 | 6.766501 | 157.2 | 10.5821 | 156.9 | 1.697488 | 157   | 2.302061 | 157.1 | 3.572744 | 157.2 | 4.825151   | 157.2 | 9.356544 |
| 157         | 2.010999946 | 157.0999908 | 2.9222   | 157.2 | 4.5851 | 157.3 | 6.769099 | 157.3 | 10.5791 | 157   | 1.695621 | 157.1 | 2.29891  | 157.2 | 3.567192 | 157.3 | 4.817556   | 157.3 | 9.343898 |
| 157.1000061 | 2.009199969 | 157.1999969 | 2.9231   | 157.3 | 4.5848 | 157.4 | 6.7704   | 157.4 | 10.5714 | 157.1 | 1.693757 | 157.2 | 2.295763 | 157.3 | 3.56192  | 157.4 | 4.809972   | 157.4 | 9.331267 |
| 157.2000122 | 2.006601081 | 157.3000031 | 2.9311   | 157.4 | 4.5824 | 157.5 | 6.7708   | 157.5 | 10.5634 | 157.2 | 1.691894 | 157.3 | 2.292622 | 157.4 | 3.556655 | 157.5 | 4.802401   | 157.5 | 9.318656 |
| 157.2999878 | 2.0140989   | 157.3999939 | 2.933    | 157.5 | 4.5804 | 157.6 | 6.7685   | 157.6 | 10.56   | 157.3 | 1.690034 | 157.4 | 2.289484 | 157.5 | 3.551398 | 157.6 | 4.794843   | 157.6 | 9.306064 |
| 157.3999939 | 2.015599591 | 157.5       | 2.9295   | 157.6 | 4.5813 | 157.7 | 6.7653   | 157.7 | 10.5554 | 157.4 | 1.688175 | 157.5 | 2.286351 | 157.6 | 3.546149 | 157.7 | 4.787298   | 157.7 | 9.293491 |
| 157.5       | 2.012999945 | 157.5999908 | 2.9304   | 157.7 | 4.5796 | 157.8 | 6.7593   | 157.8 | 10.5434 | 157.5 | 1.686319 | 157.6 | 2.283222 | 157.7 | 3.540908 | 157.8 | 4.779768   | 157.8 | 9.280942 |
| 157.6000061 | 2.011699989 | 157.6999969 | 2.9299   | 157.8 | 4.5755 | 157.9 | 6.7522   | 157.9 | 10.5356 | 157.6 | 1.684465 | 157.7 | 2.280098 | 157.8 | 3.535678 | 157.9 | 4.772249   | 157.9 | 9.268408 |
| 157.7000122 | 2.007799728 | 157.8000031 | 2.9259   | 157.9 | 4.5742 | 158   | 6.7512   | 158   | 10.5273 | 157.7 | 1.682612 | 157.8 | 2.276979 | 157.9 | 3.530453 | 158   | 4.764742   | 158   | 9.255893 |
| 157.7999878 | 2.00240035  | 157.8999939 | 2.9249   | 158   | 4.5753 | 158.1 | 6.7495   | 158.1 | 10.5164 | 157.8 | 1.680763 | 157.9 | 2.273863 | 158   | 3.525237 | 158.1 | 4.757248   | 158.1 | 9.243398 |
| 157.8999939 | 2.001800151 | 158         | 2.9258   | 158.1 | 4.5739 | 158.2 | 6.7409   | 158.2 | 10.507  | 157.9 | 1.678915 | 158   | 2.270752 | 158.1 | 3.520029 | 158.2 | 4.749767   | 158.2 | 9.230921 |
| 158         | 2.000699969 | 158.0999908 | 2.9266   | 158.2 | 4.569  | 158.3 | 6.7367   | 158.3 | 10.5008 | 158   | 1.677068 | 158.1 | 2.267645 | 158.2 | 3.514829 | 158.3 | 4.742301   | 158.3 | 9.218468 |
| 158.1000061 | 2.000299994 | 158.1999969 | 2.9236   | 158.3 | 4.5675 | 158.4 | 6.7317   | 158.4 | 10.4907 | 158   | 1.675224 | 158.2 | 2.264543 | 158.3 | 3.509639 | 158.4 | 4.734845   | 158.4 | 9.206109 |
| 158.2000122 | 1.998900238 | 158.3000031 | 2.9203   | 158.4 | 4.5663 | 158.5 | 6.7277   | 158.5 | 10.4832 | 158.2 | 1.673383 | 158.3 | 2.261446 | 158.4 | 3.504545 | 158.5 | 4.727402   | 158.5 | 9.19361  |
| 158.2999878 | 1.997897919 | 158.3999939 | 2.9166   | 158.5 | 4.5681 | 158.6 | 6.7249   | 158.6 | 10.4778 | 158.3 | 1.671543 | 158.4 | 2.258352 | 158.5 | 3.49928  | 158.6 | 4.719972   | 158.6 | 9.18121  |
| 158.3999939 | 1.997599835 | 158.5       | 2.9167   | 158.6 | 4.5736 | 158.7 | 6.7207   | 158.7 | 10.4688 | 158.4 | 1.669706 | 158.5 | 2.25263  | 158.6 | 3.494112 | 158.7 | 4.712554   | 158.7 | 9.168829 |
| 158.5       | 1.999800045 | 158.5999908 | 2.9146   | 158.7 | 4.5697 | 158.8 | 6.7164   | 158.8 | 10.4607 | 158.5 | 1.66787  | 158.6 | 2.252178 | 158.7 | 3.488953 | 158.8 | 4.705151   | 158.8 | 9.156471 |
| 158.6000061 | 2.000600049 | 158.6999969 | 2.9142   | 158.8 | 4.5644 | 158.9 | 6.7147   | 158.9 | 10.4563 | 158.6 | 1.666036 | 158.7 | 2.249098 | 158.8 | 3.483803 | 158.9 | 4.697759   | 158.9 | 9.144127 |
| 158.7000122 | 1.999000218 | 158.8000031 | 2.9162   | 158.9 | 4.5647 | 159   | 6.7094   | 159   | 10.4476 | 158.7 | 1.664205 | 158.8 | 2.246022 | 158.9 | 3.47866  | 159   | 4.690379   | 159   | 9.131803 |
| 158.7999878 | 1.999399804 | 158.8999939 | 2.917    | 159   | 4.5628 | 159.1 | 6.7051   | 159.1 | 10.4425 | 158.8 | 1.662376 | 158.9 | 2.242951 | 159   | 3.473524 | 159.1 | 4.683011   | 159.1 | 9.119497 |
| 158.8999939 | 2.00049607  | 159         | 2.9159   | 159.1 | 4.5609 | 159.2 | 6.7002   | 159.2 | 10.4348 | 158.9 | 1.660548 | 159   | 2.239883 | 159.1 | 3.468397 | 159.2 | 4.675656   | 159.2 | 9.107211 |
| 159         | 2.003500031 | 159.0999908 | 2.9153   | 159.2 | 4.5572 | 159.3 | 6.7001   | 159.3 | 10.4246 | 159   | 1.658723 | 159.1 | 2.23682  | 159.2 | 3.463278 | 159.3 | 4.668316   | 159.3 | 9.094946 |
| 159.1000061 | 2.002900047 | 159.1999969 | 2.9133   | 159.3 | 4.5568 | 159.4 | 6.690201 | 159.4 | 10.4088 | 159.1 | 1.656899 | 159.2 | 2.233761 | 159.3 | 3.458168 | 159.4 | 4.660986   | 159.4 | 9.082697 |
| 159.2000122 | 2.000400299 | 159.3000031 | 2.9139   | 159.4 | 4.5498 | 159.5 | 6.6862   | 159.5 | 10.4016 | 159.2 | 1.655078 | 159.3 | 2.230708 | 159.4 | 3.453064 | 159.5 | 4.653668   | 159.5 | 9.070467 |
| 159.2999878 | 2.000696677 | 159.3999939 | 2.906601 | 159.5 | 4.5507 | 159.6 | 6.6817   | 159.6 | 10.3929 | 159.3 | 1.653259 | 159.4 | 2.227658 | 159.5 | 3.447969 | 159.6 | 4.646363   | 159.6 | 9.058255 |
| 159.3999939 | 1.998500739 | 159.5       | 2.9094   | 159.6 | 4.5473 | 159.7 | 6.6763   | 159.7 | 10.3805 | 159.4 | 1.651442 | 159.5 | 2.224612 | 159.6 | 3.442881 | 159.7 | 4.63907    | 159.7 | 9.046062 |
| 159.5       | 2.001500047 | 159.5999908 | 2.9067   | 159.7 | 4.5419 | 159.8 | 6.6705   | 159.8 | 10.3735 | 159.5 | 1.649627 | 159.6 | 2.22157  | 159.7 | 3.437807 | 159.8 | 4.631792   | 159.8 | 9.033891 |
| 159.6000061 | 2.003300025 | 159.6999969 | 2.9007   | 159.8 | 4.5385 | 159.9 | 6.670299 | 159.9 | 10.3727 | 159.6 | 1.647813 | 159.7 | 2.218533 | 159.8 | 3.432732 | 159.9 | 4.624524   | 159.9 | 9.021735 |
| 159.7000122 | 1.996697723 | 159.8000031 | 2.8942   | 159.9 | 4.5398 | 160   | 6.6692   | 160   | 10.3684 | 159.7 | 1.646002 | 159.8 | 2.215501 | 159.9 | 3.427668 | 160   | 4.617268   | 160   | 9.009597 |
| 159.7999878 | 1.999400292 | 159.8999939 | 2.895899 | 160   | 4.5394 | 160.1 | 6.6674   | 160.1 | 10.3634 | 159.8 | 1.644194 | 159.9 | 2.212472 | 160   | 3.422612 | 160.1 | 4.610264   | 160.1 | 8.997478 |
| 159.8999939 | 1.99639389  | 160         | 2.899    | 160.1 | 4.5431 | 160.2 | 6.6616   | 160.2 | 10.3562 | 159.9 | 1.642387 | 160   | 2.209448 | 160.1 | 3.417564 | 160.2 | 4.602793   | 160.2 | 8.985377 |
| 160         | 1.99809943  | 160.0999908 | 2.901799 | 160.2 | 4.5404 | 160.3 | 6.6515   | 160.3 | 10.3452 | 160   | 1.640581 | 160.1 | 2.206428 | 160.2 | 3.412524 | 160.3 | 4.595576   | 160.3 | 8.973299 |
| 160.1000061 | 1.999100044 | 160.1999969 | 2.903    | 160.3 | 4.5352 | 160.4 | 6.6463   | 160.4 | 10.3334 | 160.1 | 1.638778 | 160.2 | 2.203412 | 160.3 | 3.407493 | 160.4 | 4.588369   | 160.4 | 8.961235 |
| 160.2000122 | 1.99679968  | 160.3000031 | 2.9002   | 160.4 | 4.5292 | 160.5 | 6.6387   | 160.5 | 10.3229 | 160.2 | 1.636977 | 160.3 | 2.200401 | 160.4 | 3.402468 | 160.5 | 4.581175   | 160.5 | 8.949189 |
| 160.2999878 | 1.99400355  | 160.3999939 | 2.8987   | 160.5 | 4.522  | 160.6 | 6.6339   | 160.6 | 10.3154 | 160.3 | 1.635179 | 160.4 | 2.197394 | 160.5 | 3.397452 | 160.6 | 4.573992   | 160.6 | 8.937162 |
| 160.3999939 | 1.99300156  | 160.5       | 2.8941   | 160.6 | 4.5169 | 160.7 | 6.630801 | 160.7 | 10.3065 | 160.4 | 1.633382 | 160.5 | 2.194391 | 160.6 | 3.392443 | 160.7 | 4.566822   | 160.7 | 8.925153 |
| 160.5       | 1.98970006  | 160.5999908 | 2.8923   | 160.7 | 4.5175 | 160.8 | 6.630399 | 160.8 | 10.2985 | 160.5 | 1.631587 | 160.6 | 2.191392 | 160.7 | 3.387442 | 160.8 | 4.559666   | 160.8 | 8.913166 |
| 160.6000061 | 1.990699984 | 160.6999969 | 2.8895   | 160.8 | 4.52   | 160.9 | 6.626699 | 160.9 | 10.2931 | 160.6 | 1.629794 | 160.7 | 2.188397 | 160.8 | 3.38245  | 160.9 | 4.55245    | 160.9 | 8.901194 |
| 160.7000122 | 1.991900537 | 160.8000031 | 2.8904   | 160.9 | 4.5234 | 161   | 6.6217   | 161   | 10.2848 | 160.7 | 1.628003 | 160.8 | 2.185408 | 160.9 | 3.377464 | 161   | 4.545386   | 161   | 8.88924  |
| 160.7999878 | 1.99279936  | 160.8999939 | 2.891099 | 161   | 4.5249 | 161.1 | 6.6185   | 161.1 | 10.2781 | 160.8 | 1.626214 | 160.9 | 2.182421 | 161   | 3.372486 | 161.1 | 4.538264   | 161.1 | 8.877304 |
| 160.8999939 | 1.99559925  | 161         | 2.8848   | 161.1 | 4.5263 | 161.2 | 6.6171   | 161.2 | 10.2709 | 160.9 | 1.624427 | 161   | 2.179439 | 161.1 | 3.367516 | 161.2 | 4.531154   | 161.2 | 8.865386 |
| 161         | 1.989900037 | 161.0999908 | 2.8835   | 161.2 | 4.5284 | 161.3 | 6.6133   | 161.3 | 10.2623 | 161   | 1.622643 | 161.1 | 2.176462 | 161.2 | 3.362554 | 161.3 | 4.524058   | 161.3 | 8.85349  |
| 161.1000061 | 1.992199998 | 161.1999969 | 2.885    | 161.3 | 4.5293 | 161.4 | 6.6094   | 161.4 | 10.2543 | 161.1 | 1.62086  | 161.2 | 2.173488 | 161.3 | 3.357601 | 161.4 | 4.516972   | 161.4 | 8.841608 |
| 161.2000122 | 1.99799995  | 161.3000031 | 2.8856   | 161.4 | 4.5311 | 161.5 | 6.6128   | 161.5 | 10.2534 | 161.2 | 1.619079 | 161.3 | 2.17052  | 161.4 | 3.352654 | 161.5 | 4.509898   | 161.5 | 8.829744 |
| 161.2999878 | 1.99639995  | 161.3999939 | 2.8862   | 161.5 | 4.5357 | 161.6 | 6.6096   | 161.6 | 10.2457 | 161.3 | 1.6173   | 161.4 | 2.167554 | 161.5 | 3.347714 | 161.6 | 4.502836   | 161.6 | 8.817898 |
| 161.3999939 | 1.995799999 | 161.5       | 2.8914   | 161.6 | 4.5305 | 161.7 | 6.6048   | 161.7 | 10.2367 | 161.4 | 1.615523 | 161.5 | 2.164593 | 161.6 | 3.342783 | 161.7 | 4.495785   | 161.7 | 8.80607  |
| 161.5       | 2.001200041 | 161.5999908 | 2.8888   | 161.7 | 4.5281 | 161.8 | 6.6026   | 161.8 | 10.2292 | 161.5 | 1.613748 | 161.6 | 2.161636 | 161.7 | 3.337859 | 161.8 | 4.488749</ |       |          |

|             |             |             |          |       |        |       |          |       |          |       |          |       |          |       |          |       |          |       |          |
|-------------|-------------|-------------|----------|-------|--------|-------|----------|-------|----------|-------|----------|-------|----------|-------|----------|-------|----------|-------|----------|
| 167.8999939 | 1.937599902 | 168         | 2.7889   | 168.1 | 4.3076 | 168.2 | 6.2679   | 168.2 | 9.6968   | 167.9 | 1.504191 | 168   | 1.980816 | 168.1 | 3.038085 | 168.2 | 4.062034 | 168.2 | 8.07425  |
| 168         | 1.937999962 | 168.0999908 | 2.7835   | 168.2 | 4.3041 | 168.3 | 6.2606   | 168.3 | 9.6891   | 168.1 | 1.502541 | 168.1 | 1.978117 | 168.2 | 3.036361 | 168.3 | 4.057273 | 168.3 | 8.063539 |
| 168.1000061 | 1.933099957 | 168.1999969 | 2.7835   | 168.3 | 4.3054 | 168.4 | 6.2539   | 168.4 | 9.6805   | 168.1 | 1.500892 | 168.2 | 1.975423 | 168.3 | 3.029186 | 168.4 | 4.049421 | 168.4 | 8.052841 |
| 168.2000122 | 1.936500071 | 168.3000031 | 2.784    | 168.4 | 4.3015 | 168.5 | 6.2464   | 168.5 | 9.6716   | 168.2 | 1.499245 | 168.3 | 1.972733 | 168.4 | 3.024746 | 168.5 | 4.043129 | 168.5 | 8.042159 |
| 168.2999878 | 1.937099899 | 168.3999939 | 2.7813   | 168.5 | 4.2983 | 168.6 | 6.2418   | 168.6 | 9.6617   | 168.3 | 1.497601 | 168.4 | 1.970045 | 168.5 | 3.020314 | 168.6 | 4.036848 | 168.6 | 8.031493 |
| 168.3999939 | 1.934000087 | 168.5       | 2.7779   | 168.6 | 4.2936 | 168.7 | 6.2399   | 168.7 | 9.6579   | 168.4 | 1.495958 | 168.5 | 1.967362 | 168.6 | 3.015888 | 168.7 | 4.030578 | 168.7 | 8.020843 |
| 168.5       | 1.93140004  | 168.5999908 | 2.7776   | 168.7 | 4.2961 | 168.8 | 6.2355   | 168.8 | 9.6524   | 168.5 | 1.494317 | 168.6 | 1.964683 | 168.7 | 3.011468 | 168.8 | 4.023199 | 168.8 | 8.010211 |
| 168.6000061 | 1.930699944 | 168.6999969 | 2.7813   | 168.8 | 4.2969 | 168.9 | 6.23     | 168.9 | 9.6437   | 168.6 | 1.492677 | 168.7 | 1.962007 | 168.8 | 3.007057 | 168.9 | 4.018069 | 168.9 | 7.999593 |
| 168.7000122 | 1.9336002   | 168.8000031 | 2.7823   | 168.9 | 4.295  | 169   | 6.2271   | 169   | 9.6405   | 168.7 | 1.491039 | 168.8 | 1.959336 | 168.9 | 3.002652 | 169   | 4.01183  | 169   | 7.989899 |
| 168.7999878 | 1.93199751  | 168.8999939 | 2.7803   | 169   | 4.2966 | 169.1 | 6.2226   | 169.1 | 9.6339   | 168.8 | 1.489404 | 168.9 | 1.956667 | 169   | 2.998253 | 169.1 | 4.005601 | 169.1 | 7.978402 |
| 168.8999939 | 1.92909992  | 169         | 2.7802   | 169.1 | 4.2962 | 169.2 | 6.2131   | 169.2 | 9.6265   | 168.9 | 1.487777 | 169   | 1.954003 | 169.1 | 2.993861 | 169.2 | 3.999382 | 169.2 | 7.96783  |
| 169         | 1.929099977 | 169.0999908 | 2.7778   | 169.2 | 4.2946 | 169.3 | 6.2087   | 169.3 | 9.6213   | 169   | 1.486138 | 169.1 | 1.951342 | 169.2 | 2.989475 | 169.3 | 3.993176 | 169.3 | 7.957277 |
| 169.1000061 | 1.927900023 | 169.1999969 | 2.7761   | 169.3 | 4.2953 | 169.4 | 6.2026   | 169.4 | 9.6141   | 169.1 | 1.484508 | 169.2 | 1.948685 | 169.3 | 2.985098 | 169.4 | 3.986977 | 169.4 | 7.946736 |
| 169.2000122 | 1.924900063 | 169.3000031 | 2.7761   | 169.4 | 4.2941 | 169.5 | 6.1975   | 169.5 | 9.6041   | 169.2 | 1.482879 | 169.3 | 1.946032 | 169.4 | 2.980726 | 169.5 | 3.980789 | 169.5 | 7.936211 |
| 169.2999878 | 1.927399838 | 169.3999939 | 2.7759   | 169.5 | 4.291  | 169.6 | 6.197    | 169.6 | 9.5994   | 169.3 | 1.481253 | 169.4 | 1.943383 | 169.5 | 2.976361 | 169.6 | 3.974612 | 169.6 | 7.925702 |
| 169.3999939 | 1.927899868 | 169.5       | 2.7754   | 169.6 | 4.2874 | 169.7 | 6.1975   | 169.7 | 9.5938   | 169.4 | 1.479628 | 169.5 | 1.940737 | 169.6 | 2.972002 | 169.7 | 3.968444 | 169.7 | 7.915208 |
| 169.5       | 1.926900051 | 169.5999908 | 2.7783   | 169.7 | 4.2863 | 169.8 | 6.195    | 169.8 | 9.587    | 169.5 | 1.478005 | 169.6 | 1.938095 | 169.7 | 2.96765  | 169.8 | 3.962289 | 169.8 | 7.904732 |
| 169.6000061 | 1.928100028 | 169.6999969 | 2.7825   | 169.8 | 4.2834 | 169.9 | 6.1902   | 169.9 | 9.5799   | 169.6 | 1.476384 | 169.7 | 1.935456 | 169.8 | 2.963307 | 169.9 | 3.956142 | 169.9 | 7.894269 |
| 169.7000122 | 1.93050004  | 169.8000031 | 2.7795   | 169.9 | 4.2805 | 170   | 6.1794   | 170   | 9.5695   | 169.7 | 1.474765 | 169.8 | 1.932822 | 169.9 | 2.958968 | 170   | 3.950005 | 170   | 7.883821 |
| 169.7999878 | 1.92919997  | 169.8999939 | 2.7778   | 170   | 4.2734 | 170.1 | 6.1797   | 170.1 | 9.5656   | 169.8 | 1.473148 | 169.9 | 1.930191 | 170   | 2.954636 | 170.1 | 3.943878 | 170.1 | 7.873389 |
| 169.8999939 | 1.933599845 | 170         | 2.771    | 170.1 | 4.2732 | 170.2 | 6.178001 | 170.2 | 9.560001 | 169.9 | 1.471532 | 170   | 1.927563 | 170.1 | 2.950311 | 170.2 | 3.937761 | 170.2 | 7.862972 |
| 170         | 1.933300052 | 170.0999908 | 2.7711   | 170.2 | 4.2723 | 170.3 | 6.172299 | 170.3 | 9.557299 | 170   | 1.469918 | 170.1 | 1.92494  | 170.2 | 2.945992 | 170.3 | 3.931657 | 170.3 | 7.852574 |
| 170.1000061 | 1.939100059 | 170.1999969 | 2.77     | 170.3 | 4.2727 | 170.4 | 6.1721   | 170.4 | 9.5486   | 170.1 | 1.468306 | 170.2 | 1.922319 | 170.3 | 2.941682 | 170.4 | 3.92556  | 170.4 | 7.842188 |
| 170.2000122 | 1.942100577 | 170.3000031 | 2.7735   | 170.4 | 4.2678 | 170.5 | 6.1723   | 170.5 | 9.5403   | 170.2 | 1.466695 | 170.3 | 1.919704 | 170.4 | 2.937376 | 170.5 | 3.919474 | 170.5 | 7.831871 |
| 170.2999878 | 1.945499043 | 170.3999939 | 2.7693   | 170.5 | 4.2676 | 170.6 | 6.1673   | 170.6 | 9.5314   | 170.3 | 1.465087 | 170.4 | 1.917091 | 170.5 | 2.933078 | 170.6 | 3.913398 | 170.6 | 7.821461 |
| 170.3999939 | 1.947000068 | 170.5       | 2.7698   | 170.6 | 4.2624 | 170.7 | 6.1669   | 170.7 | 9.5235   | 170.4 | 1.46348  | 170.5 | 1.914482 | 170.6 | 2.928785 | 170.7 | 3.907332 | 170.7 | 7.811121 |
| 170.5       | 1.950500045 | 170.5999908 | 2.7674   | 170.7 | 4.2631 | 170.8 | 6.1628   | 170.8 | 9.5136   | 170.5 | 1.461875 | 170.6 | 1.911876 | 170.7 | 2.9245   | 170.8 | 3.901277 | 170.8 | 7.800799 |
| 170.6000061 | 1.951099965 | 170.6999969 | 2.7656   | 170.8 | 4.263  | 170.9 | 6.158    | 170.9 | 9.5067   | 170.6 | 1.460272 | 170.7 | 1.909275 | 170.8 | 2.920222 | 170.9 | 3.895231 | 170.9 | 7.790488 |
| 170.7000122 | 1.950700079 | 170.8000031 | 2.7636   | 170.9 | 4.2601 | 171   | 6.1588   | 171   | 9.5035   | 170.7 | 1.458671 | 170.8 | 1.906677 | 170.9 | 2.91595  | 171   | 3.889195 | 171   | 7.780194 |
| 170.7999878 | 1.948400009 | 170.8999939 | 2.7624   | 171   | 4.2581 | 171.1 | 6.1632   | 171.1 | 9.5011   | 170.8 | 1.457071 | 170.9 | 1.904083 | 171   | 2.911684 | 171.1 | 3.883169 | 171.1 | 7.769914 |
| 170.8999939 | 1.944700201 | 171         | 2.7674   | 171.1 | 4.2606 | 171.2 | 6.160801 | 171.2 | 9.495201 | 170.9 | 1.455474 | 171   | 1.901492 | 171.1 | 2.907424 | 171.2 | 3.877152 | 171.2 | 7.759649 |
| 171         | 1.945499967 | 171.0999908 | 2.772099 | 171.2 | 4.2592 | 171.3 | 6.162299 | 171.3 | 9.491299 | 171   | 1.453877 | 171.1 | 1.898905 | 171.2 | 2.903171 | 171.3 | 3.871148 | 171.3 | 7.749403 |
| 171.1000061 | 1.950199962 | 171.1999969 | 2.77     | 171.3 | 4.2601 | 171.4 | 6.1621   | 171.4 | 9.4871   | 171.1 | 1.452283 | 171.2 | 1.898926 | 171.3 | 2.89926  | 171.4 | 3.865151 | 171.4 | 7.739168 |
| 171.2000122 | 1.952300671 | 171.3000031 | 2.7722   | 171.4 | 4.2598 | 171.5 | 6.1552   | 171.5 | 9.4811   | 171.2 | 1.450691 | 171.3 | 1.897442 | 171.4 | 2.894686 | 171.5 | 3.859165 | 171.5 | 7.728949 |
| 171.2999878 | 1.955099325 | 171.3999939 | 2.7722   | 171.5 | 4.2612 | 171.6 | 6.1558   | 171.6 | 9.4752   | 171.3 | 1.4491   | 171.4 | 1.891165 | 171.5 | 2.890453 | 171.6 | 3.853188 | 171.6 | 7.718744 |
| 171.3999939 | 1.956099604 | 171.5       | 2.7712   | 171.6 | 4.2683 | 171.7 | 6.1573   | 171.7 | 9.47     | 171.4 | 1.447511 | 171.5 | 1.888592 | 171.6 | 2.886226 | 171.7 | 3.847222 | 171.7 | 7.708555 |
| 171.5       | 1.957399992 | 171.5999908 | 2.775199 | 171.7 | 4.2717 | 171.8 | 6.156    | 171.8 | 9.4662   | 171.5 | 1.445924 | 171.6 | 1.886023 | 171.7 | 2.882006 | 171.8 | 3.841266 | 171.8 | 7.698383 |
| 171.6000061 | 1.9644999   | 171.6999969 | 2.7781   | 171.8 | 4.2705 | 171.9 | 6.1534   | 171.9 | 9.4574   | 171.6 | 1.444339 | 171.7 | 1.883457 | 171.8 | 2.877793 | 171.9 | 3.835319 | 171.9 | 7.688223 |
| 171.7000122 | 1.963800319 | 171.8000031 | 2.7785   | 171.9 | 4.269  | 172   | 6.1485   | 172   | 9.4496   | 171.7 | 1.442755 | 171.8 | 1.880896 | 171.9 | 2.873585 | 172   | 3.829382 | 172   | 7.678079 |
| 171.7999878 | 1.962799697 | 171.8999939 | 2.7786   | 172   | 4.2662 | 172.1 | 6.1402   | 172.1 | 9.438    | 171.8 | 1.441174 | 171.9 | 1.878338 | 172   | 2.869384 | 172.1 | 3.823454 | 172.1 | 7.667949 |
| 171.8999939 | 1.962800022 | 172         | 2.7776   | 172.1 | 4.2641 | 172.2 | 6.134    | 172.2 | 9.4313   | 171.9 | 1.439594 | 172   | 1.875783 | 172.1 | 2.865189 | 172.2 | 3.817537 | 172.2 | 7.657834 |
| 172         | 1.963500055 | 172.0999908 | 2.7717   | 172.2 | 4.2598 | 172.3 | 6.127    | 172.3 | 9.4223   | 172   | 1.438015 | 172.1 | 1.873231 | 172.2 | 2.861001 | 172.3 | 3.811163 | 172.3 | 7.647737 |
| 172.1000061 | 1.960000031 | 172.1999969 | 2.7692   | 172.3 | 4.2545 | 172.4 | 6.1199   | 172.4 | 9.4122   | 172.1 | 1.436439 | 172.2 | 1.870684 | 172.3 | 2.856821 | 172.4 | 3.805732 | 172.4 | 7.637651 |
| 172.2000122 | 1.959100028 | 172.3000031 | 2.7706   | 172.4 | 4.2517 | 172.5 | 6.1158   | 172.5 | 9.4042   | 172.2 | 1.434864 | 172.3 | 1.86814  | 172.4 | 2.852645 | 172.5 | 3.799844 | 172.5 | 7.62758  |
| 172.2999878 | 1.959799872 | 172.3999939 | 2.769    | 172.5 | 4.2504 | 172.6 | 6.1133   | 172.6 | 9.396    | 172.3 | 1.433291 | 172.4 | 1.8656   | 172.5 | 2.848476 | 172.6 | 3.793965 | 172.6 | 7.617524 |
| 172.3999939 | 1.957600305 | 172.5       | 2.7688   | 172.6 | 4.2486 | 172.7 | 6.116    | 172.7 | 9.39     | 172.4 | 1.43172  | 172.5 | 1.863062 | 172.6 | 2.844313 | 172.7 | 3.788095 | 172.7 | 7.607483 |
| 172.5       | 1.960499961 | 172.5999908 | 2.7676   | 172.7 | 4.252  | 172.8 | 6.1135   | 172.8 | 9.3847   | 172.5 | 1.43015  | 172.6 | 1.860529 | 172.7 | 2.840157 | 172.8 | 3.782238 | 172.8 | 7.59746  |
| 172.6000061 | 1.959200047 | 172.6999969 | 2.7669   | 172.8 | 4.2539 | 172.9 | 6.1098   | 172.9 | 9.3787   | 172.6 | 1.428582 | 172.7 | 1.857999 | 172.8 | 2.836008 | 172.9 | 3.776388 | 172.9 | 7.587448 |
| 172.7000122 | 1.961199972 | 172.8000031 | 2.7652   | 172.9 | 4.2543 | 173   | 6.109    | 173   | 9.3795   | 172.7 | 1.427016 | 172.8 | 1.855473 | 172.9 | 2.831864 | 173   | 3.770547 | 173   | 7.57745  |
| 172.7999878 | 1.961899988 | 172.8999939 | 2.7645   | 173   | 4.2537 | 173.1 | 6.1051   | 173.1 | 9.3731   | 172.8 | 1.425452 | 172.9 | 1.85295  | 173   | 2.827727 | 173.1 | 3.764717 | 173.1 | 7.567468 |
| 172.8999939 | 1.962099813 | 173         | 2.7677   | 173.1 | 4.2474 | 173.2 | 6.1035   | 173.2 | 9.3697   | 172.9 | 1.42389  | 173   | 1.850431 | 173.1 | 2.823596 | 173.2 | 3.758896 | 173.2 | 7.5575   |
| 173         | 1.964199947 | 173.0999908 | 2.7667   | 173.2 | 4.2419 | 173.3 | 6.102599 | 173.3 | 9.360999 | 172.9 | 1.422329 | 173.1 | 1.847915 | 173.2 | 2.819471 | 173.3 | 3.753086 | 173.3 | 7.547549 |
| 173.1000061 | 1.963699947 | 173.1999969 | 2.7659   | 173.3 | 4.2426 | 173.4 | 6.       |       |          |       |          |       |          |       |          |       |          |       |          |

|             |             |             |          |       |        |       |          |       |          |       |          |       |          |       |          |       |          |       |          |
|-------------|-------------|-------------|----------|-------|--------|-------|----------|-------|----------|-------|----------|-------|----------|-------|----------|-------|----------|-------|----------|
| 179.3999939 | 1.976400191 | 179.5       | 2.7419   | 179.6 | 4.1516 | 179.7 | 5.921    | 179.7 | 9.0643   | 179.4 | 1.325974 | 179.5 | 1.693996 | 179.6 | 2.568155 | 179.7 | 3.400297 | 179.7 | 6.939711 |
| 179.5       | 1.97769987  | 179.5999908 | 2.7382   | 179.7 | 4.1487 | 179.8 | 5.912    | 179.8 | 9.0593   | 179.5 | 1.324522 | 179.6 | 1.691698 | 179.7 | 2.564418 | 179.8 | 3.395073 | 179.8 | 6.930655 |
| 179.6000061 | 1.974299971 | 179.6999969 | 2.7377   | 179.8 | 4.1442 | 179.9 | 5.9047   | 179.9 | 9.0532   | 179.6 | 1.323072 | 179.7 | 1.689404 | 179.8 | 2.560689 | 179.9 | 3.389856 | 179.9 | 6.921608 |
| 179.7000122 | 1.972199851 | 179.8000031 | 2.7358   | 179.9 | 4.1431 | 180.0 | 5.9048   | 180.0 | 9.0507   | 179.7 | 1.321623 | 179.8 | 1.687113 | 179.9 | 2.556694 | 180.0 | 3.384648 | 180.0 | 6.912575 |
| 179.7999878 | 1.967900109 | 179.8999939 | 2.7339   | 180.0 | 4.1439 | 180.1 | 5.9069   | 180.1 | 9.0494   | 179.8 | 1.320177 | 179.9 | 1.684824 | 180.0 | 2.553244 | 180.1 | 3.379448 | 180.1 | 6.905554 |
| 179.8999939 | 1.965799901 | 180.0       | 2.7363   | 180.1 | 4.1442 | 180.2 | 5.9006   | 180.2 | 9.0425   | 179.9 | 1.318731 | 180.0 | 1.682539 | 180.1 | 2.549553 | 180.2 | 3.374256 | 180.2 | 6.895457 |
| 180.0       | 1.967700055 | 180.0999908 | 2.736699 | 180.2 | 4.1371 | 180.3 | 5.8934   | 180.3 | 9.0331   | 180.0 | 1.317287 | 180.1 | 1.680257 | 180.2 | 2.545822 | 180.3 | 3.369075 | 180.3 | 6.885555 |
| 180.1000061 | 1.9663      | 180.1999969 | 2.7399   | 180.3 | 4.131  | 180.4 | 5.883901 | 180.4 | 9.024701 | 180.1 | 1.315845 | 180.2 | 1.677979 | 180.3 | 2.542121 | 180.4 | 3.3639   | 180.4 | 6.876573 |
| 180.2000122 | 1.96649513  | 180.3000031 | 2.7349   | 180.4 | 4.1263 | 180.5 | 5.8723   | 180.5 | 9.0163   | 180.2 | 1.314405 | 180.3 | 1.675704 | 180.4 | 2.538424 | 180.5 | 3.358733 | 180.5 | 6.867604 |
| 180.2999878 | 1.965100462 | 180.3999939 | 2.733001 | 180.5 | 4.1241 | 180.6 | 5.8628   | 180.6 | 9.0055   | 180.3 | 1.312966 | 180.4 | 1.673431 | 180.5 | 2.534732 | 180.6 | 3.353575 | 180.6 | 6.858648 |
| 180.3999939 | 1.964200686 | 180.5       | 2.7284   | 180.6 | 4.1202 | 180.7 | 5.854499 | 180.7 | 9.992799 | 180.4 | 1.311529 | 180.5 | 1.671162 | 180.6 | 2.531046 | 180.7 | 3.348426 | 180.7 | 6.849705 |
| 180.5       | 1.968000042 | 180.5999908 | 2.726701 | 180.7 | 4.1068 | 180.8 | 5.844701 | 180.8 | 9.976101 | 180.5 | 1.310093 | 180.6 | 1.668896 | 180.7 | 2.527366 | 180.8 | 3.343286 | 180.8 | 6.840777 |
| 180.6000061 | 1.955100024 | 180.6999969 | 2.7247   | 180.8 | 4.0953 | 180.9 | 5.834601 | 180.9 | 9.962801 | 180.6 | 1.308659 | 180.7 | 1.666633 | 180.8 | 2.525693 | 180.9 | 3.338153 | 180.9 | 6.83186  |
| 180.7000122 | 1.949599072 | 180.8000031 | 2.7231   | 180.9 | 4.0893 | 181.0 | 5.8209   | 181.0 | 9.9473   | 180.7 | 1.307226 | 180.8 | 1.664374 | 180.9 | 2.520024 | 181.0 | 3.333028 | 181.0 | 6.822955 |
| 180.7999878 | 1.939101007 | 180.8999939 | 2.723901 | 181.0 | 4.0757 | 181.1 | 5.8173   | 181.1 | 9.9375   | 180.8 | 1.305796 | 180.9 | 1.662117 | 181.0 | 2.51636  | 181.1 | 3.327912 | 181.1 | 6.814063 |
| 180.8999939 | 1.932300529 | 181.0       | 2.7216   | 181.1 | 4.0685 | 181.2 | 5.814901 | 181.2 | 9.930701 | 180.9 | 1.304366 | 181.0 | 1.659863 | 181.1 | 2.512702 | 181.2 | 3.322804 | 181.2 | 6.805183 |
| 181.0       | 1.921600035 | 181.0999908 | 2.7181   | 181.2 | 4.0616 | 181.3 | 5.820999 | 181.3 | 9.928299 | 181.0 | 1.302939 | 181.1 | 1.657613 | 181.2 | 2.509409 | 181.3 | 3.317706 | 181.3 | 6.796319 |
| 181.1000061 | 1.919599969 | 181.1999969 | 2.7154   | 181.3 | 4.0658 | 181.4 | 5.8211   | 181.4 | 9.9218   | 181.1 | 1.301512 | 181.2 | 1.655366 | 181.3 | 2.505404 | 181.4 | 3.312614 | 181.4 | 6.787465 |
| 181.2000122 | 1.919401307 | 181.3000031 | 2.7193   | 181.4 | 4.0683 | 181.5 | 5.8175   | 181.5 | 9.9123   | 181.2 | 1.300088 | 181.3 | 1.653122 | 181.4 | 2.501762 | 181.5 | 3.307531 | 181.5 | 6.778623 |
| 181.2999878 | 1.928198715 | 181.3999939 | 2.7176   | 181.5 | 4.0672 | 181.6 | 5.8194   | 181.6 | 9.9089   | 181.3 | 1.298665 | 181.4 | 1.650881 | 181.5 | 2.498126 | 181.6 | 3.302456 | 181.6 | 6.769795 |
| 181.3999939 | 1.928099517 | 181.5       | 2.7171   | 181.6 | 4.0708 | 181.7 | 5.819    | 181.7 | 9.9049   | 181.4 | 1.297244 | 181.5 | 1.648643 | 181.6 | 2.494496 | 181.7 | 3.297389 | 181.7 | 6.760978 |
| 181.5       | 1.927699968 | 181.5999908 | 2.717699 | 181.7 | 4.07   | 181.8 | 5.8148   | 181.8 | 9.8974   | 181.5 | 1.295824 | 181.6 | 1.646408 | 181.7 | 2.490871 | 181.8 | 3.292332 | 181.8 | 6.752177 |
| 181.6000061 | 1.926299964 | 181.6999969 | 2.718    | 181.8 | 4.0648 | 181.9 | 5.817399 | 181.9 | 9.891299 | 181.6 | 1.294406 | 181.7 | 1.644177 | 181.8 | 2.487252 | 181.9 | 3.287282 | 181.9 | 6.743386 |
| 181.7000122 | 1.925900369 | 181.8000031 | 2.715    | 181.9 | 4.0686 | 182.0 | 5.8212   | 182.0 | 9.8932   | 181.7 | 1.292989 | 181.8 | 1.641949 | 181.9 | 2.483638 | 182.0 | 3.282424 | 182.0 | 6.734608 |
| 181.7999878 | 1.926899678 | 181.8999939 | 2.713199 | 182.0 | 4.0717 | 182.1 | 5.8241   | 182.1 | 9.8982   | 181.8 | 1.291574 | 181.9 | 1.639723 | 182.0 | 2.48003  | 182.1 | 3.277206 | 182.1 | 6.725842 |
| 181.8999939 | 1.926399282 | 182.0       | 2.7161   | 182.1 | 4.0763 | 182.2 | 5.8262   | 182.2 | 9.8996   | 181.9 | 1.290161 | 182.0 | 1.637501 | 182.1 | 2.476427 | 182.2 | 3.27218  | 182.2 | 6.717088 |
| 182.0       | 1.928099961 | 182.0999908 | 2.724698 | 182.2 | 4.0788 | 182.3 | 5.825    | 182.3 | 9.8989   | 182.0 | 1.288749 | 182.1 | 1.635281 | 182.2 | 2.472829 | 182.3 | 3.267163 | 182.3 | 6.70835  |
| 182.1000061 | 1.932900045 | 182.1999969 | 2.7286   | 182.3 | 4.0757 | 182.4 | 5.8215   | 182.4 | 9.8979   | 182.1 | 1.287338 | 182.2 | 1.633065 | 182.3 | 2.469238 | 182.4 | 3.262154 | 182.4 | 6.699621 |
| 182.2000122 | 1.939300349 | 182.3000031 | 2.7246   | 182.4 | 4.0745 | 182.5 | 5.8197   | 182.5 | 9.8975   | 182.2 | 1.285929 | 182.3 | 1.630852 | 182.4 | 2.465651 | 182.5 | 3.257152 | 182.5 | 6.690905 |
| 182.2999878 | 1.935699728 | 182.3999939 | 2.7218   | 182.5 | 4.075  | 182.6 | 5.8202   | 182.6 | 9.8973   | 182.3 | 1.284522 | 182.4 | 1.628642 | 182.5 | 2.46207  | 182.6 | 3.252159 | 182.6 | 6.682201 |
| 182.3999939 | 1.934099718 | 182.5       | 2.7243   | 182.6 | 4.0737 | 182.7 | 5.82101  | 182.7 | 9.897201 | 182.4 | 1.283117 | 182.5 | 1.626435 | 182.6 | 2.458493 | 182.7 | 3.247173 | 182.7 | 6.673751 |
| 182.5       | 1.932900038 | 182.5999908 | 2.725999 | 182.7 | 4.0782 | 182.8 | 5.822299 | 182.8 | 9.897899 | 182.5 | 1.281713 | 182.6 | 1.624231 | 182.7 | 2.454923 | 182.8 | 3.242197 | 182.8 | 6.664834 |
| 182.6000061 | 1.932999941 | 182.6999969 | 2.7238   | 182.8 | 4.0798 | 182.9 | 5.824699 | 182.9 | 9.897499 | 182.6 | 1.28031  | 182.7 | 1.62203  | 182.8 | 2.451359 | 182.9 | 3.237228 | 182.9 | 6.656167 |
| 182.7000122 | 1.929501056 | 182.8000031 | 2.7248   | 182.9 | 4.0773 | 183.0 | 5.8311   | 183.0 | 9.89679  | 182.7 | 1.278909 | 182.8 | 1.619833 | 182.9 | 2.447799 | 183.0 | 3.232267 | 183.0 | 6.647513 |
| 182.7999878 | 1.931098949 | 182.8999939 | 2.720099 | 183.0 | 4.08   | 183.1 | 5.8316   | 183.1 | 9.89637  | 182.8 | 1.27751  | 182.9 | 1.617638 | 183.0 | 2.444244 | 183.1 | 3.227313 | 183.1 | 6.638871 |
| 182.8999939 | 1.934199286 | 183.0       | 2.7247   | 183.1 | 4.0746 | 183.2 | 5.836701 | 183.2 | 9.896301 | 182.9 | 1.276112 | 183.0 | 1.615446 | 183.1 | 2.440695 | 183.2 | 3.222368 | 183.2 | 6.630241 |
| 183.0       | 1.939400011 | 183.0999908 | 2.727799 | 183.2 | 4.0797 | 183.3 | 5.833599 | 183.3 | 9.895799 | 183.1 | 1.274716 | 183.2 | 1.613257 | 183.3 | 2.437151 | 183.4 | 3.217432 | 183.4 | 6.621627 |
| 183.1000061 | 1.939000059 | 183.1999969 | 2.7268   | 183.3 | 4.0775 | 183.4 | 5.833899 | 183.4 | 9.895699 | 183.1 | 1.273321 | 183.2 | 1.611072 | 183.3 | 2.433614 | 183.4 | 3.212503 | 183.4 | 6.613021 |
| 183.2000122 | 1.945200559 | 183.3000031 | 2.7265   | 183.4 | 4.0799 | 183.5 | 5.8362   | 183.5 | 9.89494  | 183.2 | 1.271927 | 183.3 | 1.60889  | 183.4 | 2.430081 | 183.5 | 3.207582 | 183.5 | 6.604429 |
| 183.2999878 | 1.945699402 | 183.3999939 | 2.728599 | 183.5 | 4.082  | 183.6 | 5.8393   | 183.6 | 9.89473  | 183.3 | 1.270536 | 183.4 | 1.60671  | 183.5 | 2.426553 | 183.6 | 3.202668 | 183.6 | 6.595848 |
| 183.3999939 | 1.950798997 | 183.5       | 2.7312   | 183.6 | 4.086  | 183.7 | 5.843301 | 183.7 | 9.894601 | 183.4 | 1.269146 | 183.5 | 1.604533 | 183.6 | 2.423031 | 183.7 | 3.197763 | 183.7 | 6.587279 |
| 183.5       | 1.956099973 | 183.5999908 | 2.735799 | 183.7 | 4.0913 | 183.8 | 5.844599 | 183.8 | 9.895699 | 183.5 | 1.267757 | 183.6 | 1.60236  | 183.7 | 2.419514 | 183.8 | 3.192867 | 183.8 | 6.578726 |
| 183.6000061 | 1.965200033 | 183.6999969 | 2.7397   | 183.8 | 4.092  | 183.9 | 5.847699 | 183.9 | 9.894769 | 183.6 | 1.26637  | 183.7 | 1.600189 | 183.8 | 2.416003 | 183.9 | 3.187977 | 183.9 | 6.570181 |
| 183.7000122 | 1.971801232 | 183.8000031 | 2.7327   | 183.9 | 4.0934 | 184.0 | 5.8455   | 184.0 | 9.89447  | 183.7 | 1.264985 | 183.8 | 1.598022 | 183.9 | 2.412496 | 184.0 | 3.183095 | 184.0 | 6.561469 |
| 183.7999878 | 1.976198692 | 183.8999939 | 2.730099 | 184.0 | 4.0911 | 184.1 | 5.8446   | 184.1 | 9.89447  | 183.8 | 1.263601 | 183.9 | 1.595857 | 184.0 | 2.408955 | 184.1 | 3.178221 | 184.1 | 6.553129 |
| 183.8999939 | 1.981298864 | 184.0       | 2.7224   | 184.1 | 4.0867 | 184.2 | 5.846802 | 184.2 | 9.894162 | 183.9 | 1.262218 | 184.0 | 1.593696 | 184.1 | 2.405499 | 184.2 | 3.173355 | 184.2 | 6.544622 |
| 184.0       | 1.979699947 | 184.0999908 | 2.722499 | 184.2 | 4.0897 | 184.3 | 5.852098 | 184.3 | 9.894259 | 184.0 | 1.260837 | 184.1 | 1.591537 | 184.2 | 2.402008 | 184.3 | 3.168498 | 184.3 | 6.536128 |
| 184.1000061 | 1.979599976 | 184.1999969 | 2.7234   | 184.3 | 4.0937 | 184.4 | 5.853499 | 184.4 | 9.894299 | 184.1 | 1.259458 | 184.2 | 1.589382 | 184.3 | 2.398524 | 184.4 | 3.163648 | 184.4 | 6.527645 |
| 184.2000122 | 1.987601176 | 184.3000031 | 2.7254   | 184.4 | 4.1005 | 184.5 | 5.8615   | 184.5 | 9.89445  | 184.2 | 1.25808  | 184.3 | 1.587223 | 184.4 | 2.395044 | 184.5 | 3.158805 | 184.5 | 6.519173 |
| 184.2999878 | 1.997798202 | 184.3999939 | 2.728799 | 184.5 | 4.1099 | 184.6 | 5.8665   | 184.6 | 9.89509  | 184.3 | 1.256704 | 184.4 | 1.58508  | 184.5 | 2.391569 | 184.6 | 3.153971 | 184.6 | 6.510713 |
| 184.3999939 | 2.003298658 | 184.5       | 2.7352   | 184.6 | 4.1152 | 184.7 | 5.869202 | 184.7 | 9.894402 | 184.4 | 1.255329 | 184.5 | 1.582933 | 184.6 | 2.388099 | 184.7 | 3.149144 | 184.7 | 6.502266 |
| 184.5       | 2.008200004 | 184.5999908 | 2.741    |       |        |       |          |       |          |       |          |       |          |       |          |       |          |       |          |

1981.462 3576.853 1662.069 1930.9 12h 0.0013 0.0001 3 0.0014 0.0001 3 0.001 5E-05 3 0.0015 7E-05 3 0.001 9E-05 3

n=5 wells of BV2 cells

Protein expression of IKBa (pixels)

| Ctrl  | LPS   | Cel   | SiRNA |
|-------|-------|-------|-------|
| 13153 | 8914  | 26200 | 20226 |
| 12985 | 13000 | 24392 | 15564 |
| 22731 | 8920  | 26950 | 22426 |
| 13862 | 12059 | 18368 | 13384 |
| 10036 | 9455  | 27746 | 17103 |

n=5 wells of BV2 cells

Protein expression of NFkB (percentage)

| Ctrl | LPS | Cel | SiRNA |
|------|-----|-----|-------|
| 0    | 10  | 2   | 2     |
| 1    | 9   | 0   | 3     |
| 0    | 20  | 1   | 4     |
| 1    | 11  | 0   | 1     |
| 0    | 11  | 1   | 1     |

n=5 wells of BV2 cells

Protein expression of TNFa (pixels)

| Ctrl | LPS  | Cel  | SiRNA |
|------|------|------|-------|
| 1671 | 8435 | 4642 | 4256  |
| 2825 | 7114 | 4922 | 4942  |
| 4798 | 7342 | 4962 | 4203  |
| 1699 | 8995 | 2557 | 4509  |
| 2573 | 8008 | 3391 | 4892  |

n=5 wells of BV2 cells

**Fig. 2H**

Protein expression of HnRNPA1 (pixels-Immunofluorescence)

| Ctrl   | LPS    | Cel-L  | Cel-M  | Cel-H  | LPS    | CEL   | LPS-CEL-MG132-200nM |
|--------|--------|--------|--------|--------|--------|-------|---------------------|
| 0.0162 | 0.0156 | 0.0154 | 0.022  | 0.0196 | 81268  | 59932 | 62910               |
| 0.0156 | 0.0154 | 0.0184 | 0.0161 | 0.0155 | 72259  | 50128 | 56584               |
| 0.0121 | 0.0171 | 0.0156 | 0.015  | 0.0161 | 93781  | 37764 | 103897              |
| 0.0159 | 0.0182 | 0.0154 | 0.0129 | 0.0153 | 72170  | 34199 | 94649               |
| 0.0149 | 0.0153 | 0.014  | 0.0133 | 0.0125 | 103079 | 37366 | 119957              |

n=5 well of cells

Protein expression of HnRNPA1/GAPDH (Westernblot)

| Ctrl   | LPS    | Cel-L  | Cel-M  | Cel-H  | LPS  | CEL  | LPS-CEL-MG132-200nM |
|--------|--------|--------|--------|--------|------|------|---------------------|
| 0.1668 | 0.1189 | 0.1553 | 0.1489 | 0.1553 | 1.37 | 0.77 | 1.26                |
| 0.1467 | 0.1371 | 0.1463 | 0.1372 | 0.1468 | 1.52 | 0.56 | 1.24                |
| 0.1921 | 0.1356 | 0.1346 | 0.165  | 0.1472 | 0.78 | 0.43 | 1.16                |
| 0.155  | 0.1521 | 0.1469 | 0.147  | 0.1309 |      |      |                     |
| 0.1645 | 0.1528 | 0.1587 | 0.1424 | 0.1368 |      |      |                     |

n=5 well of cells

**Fig. 2I**

TNFa/GAPDH mRNA expression in BLA

| Chow    | Com     | Cel-2.0 |
|---------|---------|---------|
| 0.00001 | 0.00082 | 0.00012 |
| 0.00007 | 0.00132 | 0.00008 |
| 0.00002 | 0.00083 | 0.00004 |
| 0.00005 | 0.00095 | 0.00001 |

n=4 mice/group

**Fig. 2J**

| E1011/GAPDH |        |        | E1011/E23 |        |        | Protein expression of HnRNPA1/GAPDH |        |        |
|-------------|--------|--------|-----------|--------|--------|-------------------------------------|--------|--------|
| Chow        | Com    | Cel    | Chow      | Com    | Cel    | Chow                                | Com    | Cel    |
| 0.0336      | 0.0235 | 0.0206 | 0.3411    | 0.4789 | 0.3195 | 0.4056                              | 0.765  | 0.7052 |
| 0.0167      | 0.0247 | 0.0311 | 0.3101    | 0.5055 | 0.424  | 0.4907                              | 0.5434 | 0.4927 |
| 0.0182      | 0.0279 | 0.0244 | 0.4316    | 0.652  | 0.4726 | 0.3906                              | 0.7804 | 0.5495 |
| 0.0221      | 0.024  | 0.023  | 0.473     | 0.5231 | 0.4032 | 0.3148                              | 0.8007 | 0.3932 |
|             | 0.0203 | 0.025  |           | 0.3852 | 0.5844 |                                     | 0.8114 |        |

n=4-5mice/group

**Fig. 2K**

| Expression of IKBa in BLA (pixels) |         |         | Expression of NFkB in BLA (pixels) |          |         |
|------------------------------------|---------|---------|------------------------------------|----------|---------|
| Chow                               | Com     | Cel     | Chow                               | Com      | Cel     |
| 3291684                            | 637440  | 2850944 | 2057325                            | 8775122  | 895419  |
| 2087294                            | 619649  | 1772799 | 862757                             | 11032040 | 2021067 |
| 2884892                            | 1335102 | 2987833 | 1755869                            | 3006894  | 1309499 |
| 4322379                            | 655699  | 1564256 | 1690760                            | 4345306  | 979746  |
|                                    |         |         | 2699185                            |          |         |

n=4 mice/group

n=4-5 mice/group

**Fig. 3B**

| Protein expression of HnRNPA1 (pixels) |         |           | Area .cell soma stained with TMEM119 (pixels) |         |           | Protein expression of TNFα (pixels) |         |           |
|----------------------------------------|---------|-----------|-----------------------------------------------|---------|-----------|-------------------------------------|---------|-----------|
| Chow-non                               | Com-non | AI-sh-AAV | Chow-non                                      | Com-non | AI-sh-AAV | Chow-non                            | Com-non | AI-sh-AAV |
| 4734699                                | 5399224 | 2611322   | 1365                                          | 2885    | 1436      | 2806461                             | 7170891 | 3059845   |
| 2301483                                | 4903360 | 2063476   | 1009                                          | 3026    | 1084      | 3340714                             | 7821563 | 2805671   |
| 2395454                                | 4660993 | 2143357   | 881.4                                         | 3039    | 1186      | 3190083                             | 5977082 | 3316294   |
| 2889301                                | 5513554 | 1909150   | 894                                           | 4038    | 1315      | 2512974                             | 5065937 | 2009972   |
| 2854437                                | 4433620 | 1659812   | 928                                           | 3606    | 1129      | 2378895                             | 8120772 | 2954055   |
| 2024157                                | 4563407 | 2065669   | 995                                           | 6561    | 1101      |                                     |         |           |
| n=6 mice/group                         |         |           | n=6 mice/group                                |         |           | n=5 mice/group                      |         |           |

**Fig. 3C**

| Day | Chow-non |             |    | Com-non |        |    | AI-sh-AAV |        |    | White adipose (g) |         |           |
|-----|----------|-------------|----|---------|--------|----|-----------|--------|----|-------------------|---------|-----------|
|     | Mean     | SEM         | N  | Mean    | SEM    | N  | Mean      | SEM    | N  | Chow-non          | Com-non | AI-sh-AAV |
| 6   | 14.73636 | 0.213306    | 11 | 15.462  | 0.2632 | 13 | 15.671    | 0.2088 | 14 | 0.5602            | 3.7     | 1.6188    |
| 5   | 18.86364 | 0.311826    | 11 | 20.431  | 0.2817 | 13 | 20.7      | 0.2845 | 14 | 0.4089            | 2.41    | 0.8557    |
| 4   | 20.86364 | 0.320452    | 11 | 23.162  | 0.3103 | 13 | 22.943    | 0.3354 | 14 | 0.3919            | 3.42    | 0.8014    |
| -3  | 22.03636 | 0.369783    | 11 | 25.108  | 0.3992 | 13 | 24.8      | 0.4308 | 14 | 0.4644            | 3.01    | 1.3794    |
| -2  | 24.28    | 0.371968    | 10 | 27.242  | 0.4073 | 12 | 27.138    | 0.5989 | 13 | 0.4377            | 2.92    | 0.3605    |
| -1  | 24.92    | 0.445825    | 10 | 28.958  | 0.4531 | 12 | 28.515    | 0.5649 | 13 | 0.612             | 2.8     | 0.7738    |
| 0   | 25.53    | 0.478131781 | 10 | 30.258  | 0.5324 | 12 | 30.592    | 0.7234 | 13 | 0.839             | 2.03    | 0.6963    |
| 1   | 26.85    | 0.477126818 | 10 | 31.808  | 0.6671 | 12 | 29.662    | 0.6996 | 13 | 0.659             | 3.53    | 0.6115    |
| 2   | 27.55    | 0.563249501 | 10 | 32.875  | 0.6938 | 12 | 29.908    | 0.6473 | 13 | 0.5541            | 3.18    | 1.3718    |
| 3   | 27.07    | 0.44        | 10 | 32.93   | 0.65   | 12 | 29.18     | 0.54   | 13 | 0.5816            | 2.83    | 0.6085    |
| 4   | 27.34    | 0.5538      | 10 | 33.66   | 0.5294 | 12 | 29.44     | 0.7158 | 13 | 2.66              | 3.586   | 1.3081    |
|     |          |             |    |         |        |    |           |        |    | 3.45              | 0.3184  |           |

  

| Day    | Chow-non |        |    | Com-non |        |    | AI-sh-AAV |        |    | Immobility time in the tail suspension tests (s) |         |           |
|--------|----------|--------|----|---------|--------|----|-----------|--------|----|--------------------------------------------------|---------|-----------|
|        | Mean     | SEM    | N  | Mean    | SEM    | N  | Mean      | SEM    | N  | Chow-non                                         | Com-non | AI-sh-AAV |
| 0min   | 10.07    | 0.4203 | 10 | 12.49   | 0.3034 | 12 | 11.55     | 0.487  | 13 | 153                                              | 173     | 144       |
| 15min  | 19.11    | 1.338  | 10 | 27.56   | 0.7985 | 12 | 24.94     | 0.9188 | 13 | 52                                               | 100     | 52        |
| 30min  | 17.93    | 1.233  | 10 | 30.5    | 1.01   | 12 | 22.6      | 1.585  | 13 | 70                                               | 154     | 83        |
| 60min  | 12.92    | 0.5122 | 10 | 27.08   | 1.406  | 12 | 18.17     | 1.431  | 13 | 92                                               | 185     | 5         |
| 120min | 8.77     | 0.5394 | 10 | 15.11   | 0.6834 | 12 | 10.5      | 0.4499 | 13 | 78                                               | 59      | 86        |

  

| Day | Chow-non |          |                         | Com-non |        |        | AI-sh-AAV |        |        | Central duration time in the open field tests (s) |         |           |
|-----|----------|----------|-------------------------|---------|--------|--------|-----------|--------|--------|---------------------------------------------------|---------|-----------|
|     | Mean     | SEM      | N                       | Mean    | SEM    | N      | Mean      | SEM    | N      | Chow-non                                          | Com-non | AI-sh-AAV |
| 3   | 9.18     | 10.54    | 10.389                  | 12.424  | 16.071 | 12.264 | 12.905    | 16.351 | 15.149 | 108                                               | 126     | 144       |
| 7   | 11.78667 | 10.61556 | 10.351                  | 17.193  | 18.155 | 16.912 | 15.069    | 14.869 | 15.911 | 108                                               | 158     | 88        |
| 11  | 12.05111 | 10.72889 | 10.842                  | 16.391  | 15.39  | 16.672 | 14.849    | 13.506 | 15.37  | 72                                                | 147     | 13        |
| 15  | 11.97556 | 11.40889 | 11.484                  | 15.87   | 15.5   | 15.87  | 14.371    | 12.157 | 14.371 | 96                                                | 162     | 6         |
| 19  | 10.88    | 11.22    | 12.202                  | 16.472  | 17.554 | 16.111 | 14.545    | 12.895 | 14.892 |                                                   | 125     | 54        |
| 23  | 11.33333 | 10.76667 | 11.636                  | 15.109  | 15.51  | 14.187 | 13.503    | 13.329 | 13.329 |                                                   | 112     | 78        |
| 27  | 11.40889 | 11.22    | 11.182                  | 14.869  | 15.51  | 15.47  | 13.72     | 13.633 | 13.286 |                                                   | 138     | 138       |
|     |          |          | n = 3 cages mice/ group |         |        |        |           |        |        |                                                   |         |           |

  

| Time        | Chow-non |      |      | Com-non |      |      | AI-sh-AAV |      |      | RER      |         |           |      |      |      |      |      |      |      |      |      |      |      |      |      |
|-------------|----------|------|------|---------|------|------|-----------|------|------|----------|---------|-----------|------|------|------|------|------|------|------|------|------|------|------|------|------|
|             | Mean     | SEM  | N    | Mean    | SEM  | N    | Mean      | SEM  | N    | Chow-non | Com-non | AI-sh-AAV |      |      |      |      |      |      |      |      |      |      |      |      |      |
| 8:00-9:00   | 0.9      | 0.92 | 0.92 | 0.91    | 0.83 | 0.93 | 0.78      | 1.01 | 0.81 | 0.76     | 0.78    | 0.79      | 0.8  | 0.73 | 0.8  | 0.77 | 0.72 | 0.78 | 0.83 | 0.78 | 0.82 | 0.79 | 0.84 | 0.84 |      |
| 9:00-10:00  | 0.82     | 0.95 | 0.95 | 0.99    | 0.82 | 0.91 | 0.82      | 1.02 | 0.87 | 0.8      | 0.77    | 0.81      | 0.79 | 0.76 | 0.81 | 0.8  | 0.77 | 0.83 | 0.83 | 0.8  | 0.82 | 0.78 | 0.79 | 0.81 |      |
| 10:00-11:00 | 0.81     | 0.95 | 0.96 | 0.97    | 0.8  | 0.83 | 0.83      | 0.96 | 0.83 | 0.79     | 0.77    | 0.77      | 0.78 | 0.74 | 0.79 | 0.81 | 0.76 | 0.8  | 0.79 | 0.79 | 0.82 | 0.76 | 0.83 | 0.81 |      |
| 11:00-12:00 | 0.77     | 0.94 | 0.92 | 0.92    | 0.83 | 0.87 | 0.91      | 0.87 | 0.81 | 0.75     | 0.8     | 0.76      | 0.76 | 0.74 | 0.78 | 0.8  | 0.74 | 0.81 | 0.77 | 0.75 | 0.82 | 0.75 | 0.81 | 0.79 |      |
| 12:00-13:00 | 0.79     | 0.81 | 0.91 | 0.91    | 0.81 | 0.86 | 0.94      | 0.91 | 0.83 | 0.77     | 0.78    | 0.83      | 0.81 | 0.75 | 0.78 | 0.81 | 0.75 | 0.77 | 0.77 | 0.77 | 0.79 | 0.79 | 0.78 | 0.79 | 0.77 |
| 13:00-14:00 | 0.88     | 0.84 | 0.93 | 0.79    | 0.82 | 0.8  | 0.96      | 0.81 | 0.81 | 0.79     | 0.81    | 0.82      | 0.77 | 0.75 | 0.81 | 0.79 | 0.77 | 0.75 | 0.78 | 0.8  | 0.76 | 0.81 | 0.83 | 0.79 |      |
| 14:00-15:00 | 0.92     | 0.81 | 0.88 | 0.83    | 0.81 | 0.83 | 0.92      | 0.84 | 0.8  | 0.77     | 0.84    | 0.82      | 0.81 | 0.75 | 0.74 | 0.8  | 0.76 | 0.75 | 0.77 | 0.77 | 0.77 | 0.8  | 0.81 | 0.75 |      |
| 15:00-16:00 | 0.87     | 0.81 | 0.84 | 0.8     | 0.83 | 0.79 | 0.89      | 0.81 | 0.81 | 0.8      | 0.8     | 0.78      | 0.8  | 0.74 | 0.81 | 0.79 | 0.75 | 0.78 | 0.79 | 0.77 | 0.78 | 0.77 | 0.82 | 0.75 |      |
| 16:00-17:00 | 0.84     | 0.9  | 0.9  | 0.84    | 0.83 | 0.83 | 0.86      | 0.84 | 0.81 | 0.79     | 0.81    | 0.82      | 0.77 | 0.73 | 0.78 | 0.78 | 0.75 | 0.75 | 0.77 | 0.76 | 0.82 | 0.78 | 0.76 | 0.78 |      |
| 17:00-18:00 | 0.9      | 0.88 | 0.88 | 0.8     | 0.81 | 0.79 | 0.85      | 0.87 | 0.79 | 0.76     | 0.81    | 0.85      | 0.81 | 0.75 | 0.78 | 0.77 | 0.8  | 0.75 | 0.78 | 0.79 | 0.79 | 0.79 | 0.76 | 0.78 |      |
| 18:00-19:00 | 0.83     | 0.85 | 0.81 | 0.81    | 0.81 | 0.78 | 0.8       | 0.83 | 0.81 | 0.8      | 0.79    | 0.79      | 0.82 | 0.75 | 0.75 | 0.8  | 0.77 | 0.78 | 0.79 | 0.78 | 0.83 | 0.83 | 0.8  | 0.8  |      |
| 19:00-20:00 | 0.8      | 0.95 | 0.82 | 0.82    | 0.84 | 0.81 | 0.79      | 0.83 | 0.79 | 0.82     | 0.83    | 0.86      | 0.82 | 0.75 | 0.8  | 0.79 | 0.82 | 0.79 | 0.8  | 0.81 | 0.77 | 0.78 | 0.76 | 0.78 |      |
| 20:00-21:00 | 0.85     | 0.92 | 0.85 | 0.83    | 0.83 | 0.79 | 0.86      | 0.85 | 0.76 | 0.78     | 0.78    | 0.79      | 0.81 | 0.73 | 0.78 | 0.78 | 0.77 | 0.75 | 0.81 | 0.75 | 0.81 | 0.85 | 0.8  | 0.78 |      |
| 21:00-22:00 | 0.81     | 0.93 | 0.94 | 0.95    | 0.88 | 0.84 | 0.89      | 0.83 | 0.81 | 0.78     | 0.82    | 0.84      | 0.85 | 0.76 | 0.8  | 0.82 | 0.8  | 0.77 | 0.82 | 0.83 | 0.8  | 0.86 | 0.83 | 0.79 |      |
| 22:00-23:00 | 0.92     | 0.95 | 0.84 | 0.86    | 0.82 | 0.82 | 0.92      | 0.91 | 0.76 | 0.77     | 0.83    | 0.87      | 0.86 | 0.74 | 0.79 | 0.77 | 0.78 | 0.75 | 0.81 | 0.81 | 0.81 | 0.83 | 0.81 | 0.8  |      |
| 23:00-24:00 | 0.94     | 0.95 | 0.82 | 0.87    | 0.84 | 0.83 | 0.93      | 0.89 | 0.77 | 0.75     | 0.83    | 0.79      | 0.84 | 0.75 | 0.78 | 0.78 | 0.79 | 0.79 | 0.78 | 0.81 | 0.87 | 0.77 | 0.85 | 0.8  |      |
| 0:00-1:00   | 0.97     | 0.96 | 0.87 | 0.91    | 0.85 | 0.89 | 0.93      | 0.97 | 0.84 | 0.77     | 0.82    | 0.8       | 0.82 | 0.77 | 0.8  | 0.81 | 0.82 | 0.84 | 0.83 | 0.82 | 0.79 | 0.79 | 0.84 | 0.84 |      |
| 1:00-2:00   | 0.97     | 0.86 | 0.94 | 0.88    | 0.82 | 0.96 | 1         | 0.98 | 0.82 | 0.78     | 0.81    | 0.78      | 0.83 | 0.76 | 0.8  | 0.81 | 0.86 | 0.83 | 0.83 | 0.82 | 0.8  | 0.81 | 0.83 | 0.8  |      |
| 2:00-3:00   | 0.97     | 0.87 | 0.95 | 0.9     | 0.78 | 0.96 | 0.98      | 0.98 | 0.8  | 0.76     | 0.84    | 0.79      | 0.81 | 0.74 | 0.82 | 0.82 | 0.78 | 0.83 | 0.81 | 0.8  | 0.81 | 0.83 | 0.75 | 0.82 |      |
| 3:00-4:00   | 1        | 0.93 | 0.94 | 0.93    | 0.84 | 0.95 | 0.98      | 0.98 | 0.83 | 0.76     | 0.81    | 0.76      | 0.8  | 0.74 | 0.83 | 0.79 | 0.8  | 0.8  | 0.83 | 0.77 | 0.8  | 0.79 | 0.78 | 0.8  |      |
| 4:00-5:00   | 0.96     | 0.89 | 0.95 | 0.83    | 0.82 | 0.95 | 1         | 1.01 | 0.82 | 0.79     | 0.8     | 0.81      | 0.79 | 0.74 | 0.81 | 0.79 | 0.78 | 0.84 | 0.8  | 0.81 | 0.79 | 0.79 | 0.77 | 0.8  |      |
| 5:00-6:00   | 1        | 0.86 | 0.96 | 0.91    | 0.84 | 0.89 | 0.98      | 0.96 | 0.83 | 0.79     | 0.81    | 0.82      | 0.77 | 0.74 | 0.81 | 0.77 | 0.78 | 0.83 | 0.78 | 0.79 | 0.76 | 0.79 | 0.81 | 0.75 |      |
| 6:00-7:00   | 0.99     | 0.91 | 0.97 | 0.94    | 0.83 | 0.88 | 0.91      | 0.95 | 0.86 | 0.79     | 0.81    | 0.82      | 0.83 | 0.75 | 0.79 | 0.81 | 0.78 | 0.77 | 0.79 | 0.84 | 0.75 | 0.79 | 0.84 | 0.79 |      |
| 7:00-8:00   | 0.97     | 0.94 | 0.95 | 0.92    | 0.82 | 0.91 | 0.77      | 0.95 | 0.83 | 0.79     | 0.82    | 0.81      | 0.8  | 0.74 | 0.76 | 0.79 | 0.76 | 0.79 | 0.79 | 0.81 | 0.78 | 0.77 | 0.82 | 0.77 |      |

**Fig. 3D**

| Protein expression of TP12 (pixels) |         |           |
|-------------------------------------|---------|-----------|
| Chow-non                            | Com-non | AI-sh-AAV |
| 6489191                             | 3327561 | 6203896   |
| 5016890                             | 2660306 | 5937624   |
| 8459539                             | 3003681 | 5341887   |
| 5276599                             | 2167280 | 4365325   |
| 4441387                             | 2986248 | 5539061   |
| n=5 mice/group                      |         |           |

**Fig. 3E**

| Protein expression of HnRNPA1 (pixels) |         |         |            |            |
|----------------------------------------|---------|---------|------------|------------|
| Chow                                   | COM     | Cel     | Cel-AI-AAV | COM-AI-AAV |
| 1472957                                | 6043419 | 3120000 | 6148438    | 15588925   |
| 2589553                                | 5543019 | 2230000 | 8071688    | 16514105   |
| 1762188                                | 6843333 | 2025586 | 7984206    | 13729038   |
| 3098374                                | 6175566 | 3464059 | 7757866    | 9729038    |
| 2803256                                | 6559039 | 2433370 | 6600218    | 8039478    |
| n=5-6 mice/group                       |         |         |            |            |



Fig. 3G

| Week    | Time  | Weight (g) |      |       |         |      |       |         |       |       |            |      |       |            |      |     | Immobility time in the tail suspension tests (s) |         |         |            |            |
|---------|-------|------------|------|-------|---------|------|-------|---------|-------|-------|------------|------|-------|------------|------|-----|--------------------------------------------------|---------|---------|------------|------------|
|         |       | Chow-non   |      |       | Com-non |      |       | Cel-non |       |       | Cel-A1-AAV |      |       | COM-A1-AAV |      |     | Chow-non                                         | Com-non | Cel-non | Cel-A1-AAV | COM-A1-AAV |
|         |       | Mean       | SEM  | N     | Mean    | SEM  | N     | Mean    | SEM   | N     | Mean       | SEM  | N     | Mean       | SEM  | N   |                                                  |         |         |            |            |
| 0       | 23.98 | 0.28       | 21   | 29.8  | 0.72    | 9    | 30.13 | 0.83    | 10    | 30.59 | 0.84       | 9    | 31.1  | 0.69       | 5    | 54  | 172                                              | 102     | 126     | 153        |            |
| 1       | 25.52 | 0.27       | 21   | 31.88 | 0.66    | 9    | 31.8  | 1.04    | 10    | 29.94 | 1.3        | 9    | 31.36 | 0.28       | 5    | 44  | 105                                              | 128     | 104     | 92         |            |
| 2       | 26.35 | 0.29       | 21   | 33.74 | 0.75    | 9    | 33.78 | 1.21    | 10    | 32.57 | 1.03       | 9    | 32.66 | 1.97       | 5    | 117 | 181                                              | 35      | 120     | 142        |            |
| 3       | 26.81 | 0.32       | 21   | 35    | 0.8     | 9    | 35.71 | 1.33    | 10    | 34.91 | 1.4        | 9    | 35.04 | 1.93       | 5    | 108 | 137                                              | 33      | 118     | 132        |            |
| 4       | 27.05 | 0.34       | 21   | 37.36 | 0.88    | 9    | 37.9  | 1.48    | 10    | 37.74 | 1.59       | 9    | 38.22 | 2.07       | 5    | 92  | 169                                              | 50      | 176     | 128        |            |
| Week(5) | 1     | 27.07      | 0.32 | 21    | 37      | 0.9  | 9     | 37.7    | 1.49  | 10    | 37.89      | 1.78 | 9     | 37.92      | 2    | 5   | 107                                              | 144     | 120     | 158        |            |
|         | 2     | 27.42      | 0.36 | 21    | 37.46   | 0.87 | 9     | 37.71   | 1.43  | 10    | 37.76      | 1.64 | 9     | 38.7       | 2.02 | 5   | 76                                               | 158     | 118     | 144        |            |
|         | 3     | 27.41      | 0.35 | 21    | 37.68   | 0.95 | 9     | 37.75   | 1.47  | 10    | 37.62      | 1.49 | 9     | 38.96      | 1.97 | 5   | 82                                               | 129     | 110     | 144        |            |
|         | 4     | 27.22      | 0.34 | 21    | 37.76   | 0.96 | 9     | 37.72   | 1.44  | 10    | 37.27      | 1.43 | 9     | 39.5       | 2.01 | 5   | 99                                               | 101     | 111     | 131        |            |
|         | 5     | 27.22      | 0.34 | 21    | 37.78   | 1    | 9     | 37.32   | 1.44  | 10    | 37.47      | 1.42 | 9     | 39.92      | 1.96 | 5   | 86                                               | 98      | 128     |            |            |
|         | 6     | 27.58      | 0.35 | 21    | 37.8    | 0.98 | 9     | 37.04   | 1.36  | 10    | 37.98      | 1.5  | 9     | 40.26      | 1.9  | 5   |                                                  |         |         |            |            |
|         | 7     | 27.5       | 0.34 | 21    | 37.82   | 0.94 | 9     | 37.09   | 1.4   | 10    | 38.46      | 1.66 | 9     | 40.6       | 1.88 | 5   |                                                  |         |         |            |            |
| Week(6) | 1     | 27.49      | 0.35 | 21    | 38      | 0.93 | 9     | 36.89   | 1.34  | 10    | 36.89      | 1.75 | 9     | 41.08      | 1.76 | 5   |                                                  |         |         |            |            |
|         | 2     | 27.46      | 0.34 | 21    | 38.13   | 0.95 | 9     | 36.64   | 1.35  | 10    | 39.12      | 1.79 | 9     | 41.74      | 1.87 | 5   |                                                  |         |         |            |            |
|         | 3     | 27.58      | 0.35 | 21    | 38.19   | 0.93 | 9     | 36.75   | 1.39  | 10    | 39.81      | 1.86 | 9     | 41.82      | 1.88 | 5   |                                                  |         |         |            |            |
|         | 4     | 27.59      | 0.36 | 21    | 38.37   | 0.93 | 9     | 36.55   | 1.33  | 10    | 39.9       | 1.86 | 9     | 42.28      | 1.81 | 5   |                                                  |         |         |            |            |
|         | 5     | 27.59      | 0.36 | 21    | 38.57   | 0.96 | 9     | 36.44   | 1.24  | 10    | 40.23      | 1.85 | 9     | 42.6       | 1.73 | 5   |                                                  |         |         |            |            |
|         | 6     | 27.49      | 0.34 | 21    | 38.69   | 0.95 | 9     | 36.43   | 1.26  | 10    | 40.39      | 1.8  | 9     | 43         | 1.69 | 5   |                                                  |         |         |            |            |
|         | 7     | 27.77      | 0.35 | 21    | 38.87   | 0.97 | 9     | 35.49   | 1.11  | 10    | 40.77      | 1.83 | 9     | 43.26      | 1.66 | 5   |                                                  |         |         |            |            |
| Week(7) | 1     | 27.75      | 0.37 | 21    | 39.1    | 0.95 | 9     | 35.07   | 1.111 | 10    | 41.04      | 1.81 | 9     | 43.28      | 1.75 | 5   |                                                  |         |         |            |            |
|         | 2     | 27.9       | 0.37 | 21    | 39.07   | 0.94 | 9     | 33.89   | 1.078 | 10    | 41.48      | 1.91 | 9     | 43.58      | 1.73 | 5   |                                                  |         |         |            |            |

| Time (min) | Blood sugar (mmol/L) |      |    |         |      |   |         |      |    |            |      |   |            |      |   |
|------------|----------------------|------|----|---------|------|---|---------|------|----|------------|------|---|------------|------|---|
|            | Chow-non             |      |    | Com-non |      |   | Cel-non |      |    | Cel-A1-AAV |      |   | COM-A1-AAV |      |   |
|            | Mean                 | SEM  | N  | Mean    | SEM  | N | Mean    | SEM  | N  | Mean       | SEM  | N | Mean       | SEM  | N |
| 0min       | 9.37                 | 0.39 | 10 | 13.19   | 0.31 | 9 | 10.76   | 0.28 | 10 | 11.92      | 0.5  | 9 | 14.1       | 1.27 | 5 |
| 15min      | 20.83                | 0.46 | 10 | 31.18   | 0.57 | 9 | 26.62   | 0.64 | 10 | 30.17      | 0.85 | 9 | 32.2       | 0.6  | 5 |
| 30min      | 19.35                | 0.72 | 10 | 32.31   | 0.43 | 9 | 26.7    | 0.83 | 10 | 31.98      | 0.41 | 9 | 33.3       | 0    | 5 |
| 60min      | 13.59                | 0.4  | 10 | 28      | 0.94 | 9 | 21.19   | 1.36 | 10 | 28.53      | 1.26 | 9 | 31.58      | 0.96 | 5 |
| 120min     | 9.01                 | 0.39 | 10 | 17.93   | 0.87 | 9 | 12.86   | 0.66 | 10 | 18.53      | 1.68 | 9 | 24.5       | 2.71 | 5 |

| Day | Food Intake (Kcal) |        |        |              |        |        |              |        |        |                  |        |        |                      |        |        |
|-----|--------------------|--------|--------|--------------|--------|--------|--------------|--------|--------|------------------|--------|--------|----------------------|--------|--------|
|     | Chow-non Ctrl      |        |        | Chow-non COM |        |        | Chow-non CEL |        |        | Chow-non hnRNPA1 |        |        | Chow-non hnRNPA1+CEL |        |        |
| 3   | 11.492             | 10.506 | 9.418  | 13.372       | 13.068 | 13.068 | 14.119       | 12.139 | 12.765 | 16.22            | 16.429 | 14.935 | 14.119               | 17.506 | 15.526 |
| 6   | 13.668             | 11.152 | 10.948 | 15.239       | 15.891 | 15.239 | 16.62        | 15.422 | 14.796 | 16.151           | 16.325 | 15.699 | 19.121               | 15.161 | 15.317 |
| 9   | 12.308             | 10.778 | 11.39  | 15.934       | 15.109 | 14.849 | 15.891       | 14.536 | 14.484 | 16.568           | 15.943 | 14.588 | 15.838               | 16.828 | 15.995 |
| 12  | 11.9               | 11.56  | 11.934 | 15.934       | 15.066 | 12.244 | 15.213       | 15.265 | 11.202 | 17.054           | 16.359 | 11.427 | 17.61                | 14.536 | 11.775 |
| 15  | 11.22              | 12.682 | 11.016 | 13.459       | 15.283 | 14.371 | 13.129       | 14.588 | 13.233 | 12.504           | 14.38  | 12.99  | 11.097               | 15.213 | 16.255 |
| 18  | 11.39              | 12.036 | 11.798 | 14.11        | 16.412 | 16.021 | 13.39        | 14.484 | 15.109 | 13.963           | 15.248 | 16.151 | 12.869               | 15.943 | 17.766 |
| 21  | 11.39              | 10.404 | 10.336 | 15.63        | 13.98  | 14.796 | 13.155       | 12.66  | 12.869 | 15.769           | 13.65  | 13.129 | 18.079               | 13.233 | 12.608 |
| 24  | 11.186             | 10.948 | 11.424 | 15.239       | 13.754 | 14.024 | 13.546       | 12.817 | 12.4   | 14.97            | 13.998 | 13.372 | 14.223               | 13.546 | 12.244 |
| 27  | 12.24              | 10.506 | 12.138 | 15.022       | 13.702 | 15.37  | 12.921       | 12.712 | 13.242 | 14.796           | 13.025 | 14.623 | 14.953               | 13.129 | 14.901 |
| 30  | 11.798             | 11.152 | 11.424 | 15.328       | 13.503 | 13.702 | 11.94        | 12.244 | 11.879 | 13.789           | 12.851 | 12.122 | 13.859               | 13.025 | 12.296 |
| 33  | 12.308             | 10.982 | 11.254 | 14.892       | 14.38  | 13.416 | 12.417       | 11.149 | 12.66  | 16.116           | 11.844 | 14.032 | 13.077               | 12.608 | 13.546 |
| 36  | 11.696             | 10.948 | 11.356 | 14.588       | 13.155 | 14.718 | 12.494       | 12.191 | 12.39  | 14.692           | 13.025 | 15.422 | 14.067               | 12.139 | 15.057 |

n=3cages mice/group

| Hrs         | RER      |        |      |         |        |      |         |        |      |            |        |      |            |        |   |
|-------------|----------|--------|------|---------|--------|------|---------|--------|------|------------|--------|------|------------|--------|---|
|             | Chow-non |        |      | Com-non |        |      | Cel-non |        |      | Cel-A1-AAV |        |      | COM-A1-AAV |        |   |
| Mean        | SEM      | N      | Mean | SEM     | N      | Mean | SEM     | N      | Mean | SEM        | N      | Mean | SEM        | N      |   |
| 8:00-9:00   | 0.8842   | 0.0208 | 8    | 0.7996  | 0.0107 | 8    | 0.8004  | 0.0057 | 8    | 0.7805     | 0.0086 | 8    | 0.7965     | 0.005  | 8 |
| 9:00-10:00  | 0.8529   | 0.0232 | 8    | 0.7971  | 0.0045 | 8    | 0.7926  | 0.0052 | 8    | 0.7819     | 0.0104 | 8    | 0.7887     | 0.0071 | 8 |
| 10:00-11:00 | 0.9246   | 0.0154 | 8    | 0.8033  | 0.0075 | 8    | 0.7904  | 0.0059 | 8    | 0.7701     | 0.0055 | 8    | 0.7863     | 0.0043 | 8 |
| 11:00-12:00 | 0.9101   | 0.0156 | 8    | 0.7818  | 0.0062 | 8    | 0.7766  | 0.0077 | 8    | 0.7628     | 0.0038 | 8    | 0.7694     | 0.0076 | 8 |
| 12:00-13:00 | 0.8641   | 0.0211 | 8    | 0.7736  | 0.0059 | 8    | 0.7598  | 0.0082 | 8    | 0.7614     | 0.0085 | 8    | 0.7577     | 0.0057 | 8 |
| 13:00-14:00 | 0.8715   | 0.016  | 8    | 0.7932  | 0.0084 | 8    | 0.7796  | 0.0118 | 8    | 0.764      | 0.0067 | 8    | 0.7735     | 0.0061 | 8 |
| 14:00-15:00 | 0.872    | 0.0127 | 8    | 0.7891  | 0.0062 | 8    | 0.7833  | 0.0095 | 8    | 0.772      | 0.0082 | 8    | 0.7712     | 0.006  | 8 |
| 15:00-16:00 | 0.8566   | 0.0159 | 8    | 0.7856  | 0.0087 | 8    | 0.7776  | 0.0078 | 8    | 0.7665     | 0.0046 | 8    | 0.7738     | 0.0108 | 8 |
| 16:00-17:00 | 0.7796   | 0.024  | 8    | 0.7971  | 0.0098 | 8    | 0.7661  | 0.0057 | 8    | 0.7795     | 0.0064 | 8    | 0.7662     | 0.0049 | 8 |
| 17:00-18:00 | 0.8167   | 0.0103 | 8    | 0.7872  | 0.0082 | 8    | 0.7801  | 0.0071 | 8    | 0.7756     | 0.0061 | 8    | 0.771      | 0.0051 | 8 |
| 18:00-19:00 | 0.8333   | 0.0134 | 8    | 0.7862  | 0.0076 | 8    | 0.7737  | 0.0089 | 8    | 0.7577     | 0.005  | 8    | 0.7583     | 0.0054 | 8 |
| 19:00-20:00 | 0.8223   | 0.0199 | 8    | 0.7909  | 0.0094 | 8    | 0.7717  | 0.0089 | 8    | 0.768      | 0.0128 | 8    | 0.7697     | 0.0056 | 8 |
| 20:00-21:00 | 0.8527   | 0.0237 | 8    | 0.7946  | 0.0138 | 8    | 0.7789  | 0.0091 | 8    | 0.7814     | 0.0127 | 8    | 0.7683     | 0.0054 | 8 |
| 21:00-22:00 | 0.8819   | 0.0193 | 8    | 0.7914  | 0.013  | 8    | 0.7664  | 0.0073 | 8    | 0.7831     | 0.0137 | 8    | 0.7755     | 0.0084 | 8 |
| 22:00-23:00 | 0.9106   | 0.0236 | 8    | 0.8115  | 0.0104 | 8    | 0.7939  | 0.0092 | 8    | 0.7841     | 0.0104 | 8    | 0.7923     | 0.0101 | 8 |
| 23:00-24:00 | 0.8988   | 0.0215 | 8    | 0.7916  | 0.0086 | 8    | 0.8024  | 0.007  | 8    | 0.7787     | 0.0122 | 8    | 0.801      | 0.0128 | 8 |
| 0:00-1:00   | 0.9469   | 0.0192 | 8    | 0.8015  | 0.0108 | 8    | 0.8081  | 0.0103 | 8    | 0.7732     | 0.0063 | 8    | 0.7906     | 0.0098 | 8 |
| 1:00-2:00   | 0.9505   | 0.0187 | 8    | 0.7895  | 0.0111 | 8    | 0.821   | 0.0089 | 8    | 0.7898     | 0.0126 | 8    | 0.8001     | 0.0127 | 8 |
| 2:00-3:00   | 0.938    | 0.017  | 8    | 0.8044  | 0.0068 | 8    | 0.8027  | 0.0059 | 8    | 0.784      | 0.0108 | 8    | 0.7749     | 0.0064 | 8 |
| 3:00-4:00   | 0.9191   | 0.0206 | 8    | 0.8099  | 0.0069 | 8    | 0.7921  | 0.0079 | 8    | 0.7841     | 0.0103 | 8    | 0.7705     | 0.0068 | 8 |
| 4:00-5:00   | 0.9299   | 0.0149 | 8    | 0.7986  | 0.0079 | 8    | 0.7859  | 0.0081 | 8    | 0.7905     | 0.0087 | 8    | 0.7805     | 0.0056 | 8 |
| 5:00-6:00   | 0.9013   | 0.0221 | 8    | 0.7831  | 0.0061 | 8    | 0.7869  | 0.0054 | 8    | 0.7904     | 0.007  | 8    | 0.7782     | 0.003  | 8 |
| 6:00-7:00   | 0.8915   | 0.0164 | 8    | 0.7831  | 0.0066 | 8    | 0.771   | 0.0043 | 8    | 0.7851     | 0.0058 | 8    | 0.7792     | 0.012  | 8 |
| 7:00-8:00   | 0.91     | 0.0152 | 8    | 0.8071  | 0.0059 | 8    | 0.7972  | 0.0081 | 8    | 0.7892     | 0.011  | 8    | 0.7858     | 0.0071 | 8 |

Fig.
