# Supplementary material for: Celastrol alleviates comorbid obesity and depression by directly binding amygdala HnRNPA1 in a mouse model
Source: PubMed Central journal article supplement (PMC8181197; doi:10.1002/ctm2.394), 2021-06-06
Supplement: CTM2-11-e394-s005.pdf [file CTM2-11-e394-s005.pdf]

| Coverage [%] | Accession | Description                                                                                                                          | # Peptides | p-value  | ratio  |
|--------------|-----------|--------------------------------------------------------------------------------------------------------------------------------------|------------|----------|--------|
| 60           | P63038    | 60 kDa heat shock protein, mitochondrial OS=Mus musculus OX=10090 GN=Hspd1 PE=1 SV=1                                                 | 56         | 9.09E-08 | 12.978 |
| 14           | Q9QXS1    | Plectin OS=Mus musculus OX=10090 GN=Plec PE=1 SV=3                                                                                   | 27         | 2.54E-06 | 5.5103 |
| 20           | Q68FD5    | Clathrin heavy chain 1 OS=Mus musculus OX=10090 GN=Cltc PE=1 SV=3                                                                    | 26         | 9.57E-06 | 3.9455 |
| 43           | P52480    | Pyruvate kinase PKM OS=Mus musculus OX=10090 GN=Pkm PE=1 SV=4                                                                        | 25         | 1.24E-05 | 5.6871 |
| 42           | P38647    | Stress-70 protein, mitochondrial OS=Mus musculus OX=10090 GN=Hspa9 PE=1 SV=3                                                         | 25         | 4.33E-07 | 7.0573 |
| 46           | P63017    | Heat shock cognate 71 kDa protein OS=Mus musculus OX=10090 GN=Hspa8 PE=1 SV=1                                                        | 24         | 1.32E-08 | 5.4161 |
| 27           | Q05920    | Pyruvate carboxylase, mitochondrial OS=Mus musculus OX=10090 GN=Pc PE=1 SV=1                                                         | 24         | 0.000317 | 1.433  |
| 15           | Q8VDD5    | Myosin-9 OS=Mus musculus OX=10090 GN=M9 PE=1 SV=4                                                                                    | 23         | 4.52E-06 | 5.1306 |
| 32           | P20029    | Endoplasmic reticulum chaperone BiP OS=Mus musculus OX=10090 GN=Hspa5 PE=1 SV=3                                                      | 22         | 6.95E-06 | 8.519  |
| 36           | Q91ZA3    | Propionyl-CoA carboxylase alpha chain, mitochondrial OS=Mus musculus OX=10090 GN=Pcca PE=1 SV=2                                      | 21         | 8.33E-05 | 1.5155 |
| 24           | O70133    | ATP-dependent RNA helicase A OS=Mus musculus OX=10090 GN=Dhx9 PE=1 SV=2                                                              | 21         | 1.59E-06 | 5.7456 |
| 35           | P48678    | Prelamin-A/C OS=Mus musculus OX=10090 GN=Lma PE=1 SV=2                                                                               | 21         | 9.62E-07 | 7.7619 |
| 46           | P08249    | Malate dehydrogenase, mitochondrial OS=Mus musculus OX=10090 GN=Mdh2 PE=1 SV=3                                                       | 20         | 3.35E-06 | 5.7307 |
| 24           | Q3V3R1    | Monofunctional C1-tetrahydrofolate synthase, mitochondrial OS=Mus musculus OX=10090 GN=Mthfd11 PE=1 SV=2                             | 20         | 3.46E-07 | 6.8154 |
| 12           | Q6P4T2    | U5 small nuclear ribonucleoprotein 200 kDa helicase OS=Mus musculus OX=10090 GN=Snrnp200 PE=1 SV=1                                   | 19         | 7.28E-06 | 3.646  |
| 31           | Q03265    | ATP synthase subunit alpha, mitochondrial OS=Mus musculus OX=10090 GN=Atp5f1a PE=1 SV=1                                              | 18         | 9.55E-08 | 6.0996 |
| 15           | Q7TPV4    | Myb-binding protein 1A OS=Mus musculus OX=10090 GN=Mybbp1a PE=1 SV=2                                                                 | 18         | 3.11E-07 | 6.8167 |
| 26           | P08113    | Endoplasmic reticulum chaperone BiP OS=Mus musculus OX=10090 GN=Hspa5 PE=1 SV=3                                                      | 18         | 1.08E-06 | 7.3780 |
| 14           | O55143    | Sarcoplasmic/endoplasmic reticulum ATPase 2 OS=Mus musculus OX=10090 GN=Atp2a2 PE=1 SV=2                                             | 18         | 1.99E-07 | 6.3320 |
| 42           | P60710    | Actin, cytoplasmic 1 OS=Mus musculus OX=10090 GN=Actb PE=1 SV=1                                                                      | 18         | 9.57E-06 | 5.8414 |
| 15           | Q6PB66    | Leucine-rich PPR motif-containing protein, mitochondrial OS=Mus musculus OX=10090 GN=Lrpprc PE=1 SV=2                                | 17         | 7.56E-08 | 4.600  |
| 43           | P16858    | Glyceraldehyde-3-phosphate dehydrogenase OS=Mus musculus OX=10090 GN=Gapdh PE=1 SV=2                                                 | 16         | 6.39E-08 | 6.4984 |
| 26           | Q99K10    | Aconitate hydratase, mitochondrial OS=Mus musculus OX=10090 GN=Aco2 PE=1 SV=1                                                        | 16         | 5.67E-06 | 3.1261 |
| 23           | P11499    | Heat shock protein HSP 90-beta OS=Mus musculus OX=10090 GN=Hsp90ab1 PE=1 SV=3                                                        | 16         | 2.91E-08 | 8.0729 |
| 41           | P20152    | Vimentin OS=Mus musculus OX=10090 GN=Vim PE=1 SV=3                                                                                   | 16         | 5.12E-06 | 6.1653 |
| 30           | P09405    | Nucleolin OS=Mus musculus OX=10090 GN=Ncl PE=1 SV=2                                                                                  | 15         | 7.45E-07 | 12.842 |
| 24           | Q8VEK3    | Heterogeneous nuclear ribonucleoprotein U OS=Mus musculus OX=10090 GN=HnrnpU PE=1 SV=1                                               | 15         | 3.07E-07 | 6.7020 |
| 21           | P07901    | Heat shock protein HSP 90-alpha OS=Mus musculus OX=10090 GN=Hsp90aa1 PE=1 SV=4                                                       | 14         | 1.19E-07 | 7.0994 |
| 41           | P68369    | Tubulin alpha-1A chain OS=Mus musculus OX=10090 GN=Tab1a PE=1 SV=1                                                                   | 14         | 1.01E-05 | 5.059  |
| 27           | Q8BH04    | Phosphoenolpyruvate carboxykinase [GTP], mitochondrial OS=Mus musculus OX=10090 GN=Pck2 PE=1 SV=1                                    | 14         | 2.14E-10 | 5.8749 |
| 8            | Q9ERU9    | E3 SUMO-protein ligase RanBP2 OS=Mus musculus OX=10090 GN=Ranbp2 PE=1 SV=2                                                           | 14         | 1.56E-05 | 4.8931 |
| 19           | Q8K411    | Presequence protease, mitochondrial OS=Mus musculus OX=10090 GN=Pitrm1 PE=1 SV=1                                                     | 14         | 1.78E-05 | 4.0310 |
| 20           | Q99MR8    | Methylcrotonyl-CoA carboxylase subunit alpha, mitochondrial OS=Mus musculus OX=10090 GN=Mcccl PE=1 SV=2                              | 14         | 1.24E-05 | 1.6632 |
| 25           | P26443    | Glutamate dehydrogenase 1, mitochondrial OS=Mus musculus OX=10090 GN=Glud1 PE=1 SV=1                                                 | 13         | 1.92E-06 | 4.3911 |
| 35           | P17182    | Alpha-enolase OS=Mus musculus OX=10090 GN=Eno1 PE=1 SV=3                                                                             | 13         | 7.77E-05 | 6.1741 |
| 18           | Q8BMS1    | Trifunctional enzyme subunit alpha, mitochondrial OS=Mus musculus OX=10090 GN=Hadha PE=1 SV=1                                        | 13         | 6.5E-07  | 6.4082 |
| 15           | Q8CGK3    | Lon protease homolog, mitochondrial OS=Mus musculus OX=10090 GN=Lonp1 PE=1 SV=2                                                      | 12         | 5.45E-06 | 5.4439 |
| 29           | Q9CZ7N    | Serine hydroxymethyltransferase, mitochondrial OS=Mus musculus OX=10090 GN=Shmt2 PE=1 SV=1                                           | 12         | 3.82E-06 | 3.0169 |
| 21           | Q8R081    | Heterogeneous nuclear ribonucleoprotein L OS=Mus musculus OX=10090 GN=HnrnpL PE=1 SV=2                                               | 12         | 3.52E-06 | 4.8879 |
| 28           | O88569    | Heterogeneous nuclear ribonucleoproteins A2/B1 OS=Mus musculus OX=10090 GN=Hnrnpa2b1 PE=1 SV=2                                       | 12         | 2.05E-07 | 8.2143 |
| 36           | P51881    | ADP/ATP translocase 2 OS=Mus musculus OX=10090 GN=Slc25a5 PE=1 SV=3                                                                  | 12         | 4.17E-07 | 7.6114 |
| 9            | Q99PV0    | Pre-mRNA-processing-splicing factor 8 OS=Mus musculus OX=10090 GN=Prpf8 PE=1 SV=2                                                    | 12         | 4.45E-06 | 3.3670 |
| 8            | E9Q7G0    | Nuclear mitotic apparatus protein 1 OS=Mus musculus OX=10090 GN=Numa1 PE=1 SV=1                                                      | 12         | 2.3E-07  | 4.9753 |
| 37           | Q61937    | Nucleophosmin OS=Mus musculus OX=10090 GN=Npm1 PE=1 SV=1                                                                             | 12         | 8.61E-07 | 10.113 |
| 28           | P56480    | ATP synthase subunit beta, mitochondrial OS=Mus musculus OX=10090 GN=Atp5f1b PE=1 SV=2                                               | 12         | 4.89E-06 | 4.2619 |
| 22           | Q9QC91    | Heat shock protein 75 kDa, mitochondrial OS=Mus musculus OX=10090 GN=Trap1 PE=1 SV=1                                                 | 12         | 3.54E-06 | 4.938  |
| 22           | P47738    | Aldehyde dehydrogenase, mitochondrial OS=Mus musculus OX=10090 GN=Aldh2 PE=1 SV=1                                                    | 12         | 5.29E-06 | 4.3876 |
| 15           | Q8BG05    | Heterogeneous nuclear ribonucleoprotein A3 OS=Mus musculus OX=10090 GN=Hnrnpa3 PE=1 SV=1                                             | 12         | 5.54E-06 | 6.128  |
| 19           | Q8C437    | Transducin beta-like protein 3 OS=Mus musculus OX=10090 GN=Tb3 PE=2 SV=1                                                             | 12         | 8.31E-07 | 4.6951 |
| 23           | P54987    | Cis-aconitate decarboxylase OS=Mus musculus OX=10090 GN=Acoad1 PE=1 SV=2                                                             | 12         | 5.12E-06 | 4.9556 |
| 17           | Q8VEM8    | Phosphate carrier protein, mitochondrial OS=Mus musculus OX=10090 GN=Slc25a3 PE=1 SV=1                                               | 11         | 2.58E-05 | 6.4464 |
| 44           | P67778    | Prohibitin OS=Mus musculus OX=10090 GN=Phb PE=1 SV=1                                                                                 | 11         | 7.37E-07 | 5.8536 |
| 7            | P19096    | Fatty acid synthase OS=Mus musculus OX=10090 GN=Fasn PE=1 SV=2                                                                       | 11         | 1.38E-05 | 3.4707 |
| 27           | Q8BFR5    | Elongation factor Tu, mitochondrial OS=Mus musculus OX=10090 GN=Tufm PE=1 SV=1                                                       | 11         | 2.62E-08 | 5.7323 |
| 18           | Q62351    | Transferrin receptor protein 1 OS=Mus musculus OX=10090 GN=Tfrc PE=1 SV=1                                                            | 11         | 1.05E-06 | 2.7167 |
| 22           | Q8C111    | Guanine nucleotide-binding protein-like 3 OS=Mus musculus OX=10090 GN=Gnl3 PE=1 SV=2                                                 | 11         | 7.74E-07 | 5.1779 |
| 21           | Q921H8    | 3-ketoacyl-CoA thiolase A, peroxisomal OS=Mus musculus OX=10090 GN=Acaa1a PE=1 SV=1                                                  | 11         | 9.03E-08 | 6.8800 |
| 29           | Q92204    | Heterogeneous nuclear ribonucleoproteins C1/C2 OS=Mus musculus OX=10090 GN=Hnrnpc PE=1 SV=1                                          | 10         | 3.64E-09 | 5.4567 |
| 25           | P54071    | Isocitrate dehydrogenase [NADP], mitochondrial OS=Mus musculus OX=10090 GN=Idh2 PE=1 SV=3                                            | 10         | 2.69E-06 | 5.7722 |
| 13           | Q78P77    | Staphylococcal nuclease domain-containing protein 1 OS=Mus musculus OX=10090 GN=Snd1 PE=1 SV=1                                       | 10         | 1.94E-08 | 6.158  |
| 15           | O08810    | 116 kDa U5 small nuclear ribonucleoprotein component OS=Mus musculus OX=10090 GN=Eftud2 PE=1 SV=1                                    | 10         | 6.14E-06 | 4.4675 |
| 23           | P35564    | Calnexin OS=Mus musculus OX=10090 GN=Canx PE=1 SV=1                                                                                  | 10         | 1.1E-07  | 7.259  |
| 14           | Q60597    | 2-oxoglutarate dehydrogenase, mitochondrial OS=Mus musculus OX=10090 GN=Ogdh PE=1 SV=3                                               | 10         | 1.01E-07 | 3.7843 |
| 13           | Q912W3    | labeled matrix-associated actin-dependent regulator of chromatin subfamily A member 5 OS=Mus musculus OX=10090 GN=Smarca5            | 10         | 1.99E-05 | 6.0780 |
| 17           | Q64521    | Glycerol-3-phosphate dehydrogenase, mitochondrial OS=Mus musculus OX=10090 GN=Gpd2 PE=1 SV=2                                         | 10         | 1.56E-07 | 3.8268 |
| 19           | Q9Z110    | Delta-1-pyrroline-5-carboxylate synthase OS=Mus musculus OX=10090 GN=Aldh18a1 PE=1 SV=2                                              | 10         | 2.37E-06 | 4.8213 |
| 12           | O35286    | Pre-mRNA-splicing factor ATP-dependent RNA helicase DHX15 OS=Mus musculus OX=10090 GN=Dhx15 PE=1 SV=2                                | 10         | 1.82E-05 | 4.0631 |
| 2            | Q9QXZ0    | Microtubule-actin cross-linking factor 1 OS=Mus musculus OX=10090 GN=Macf1 PE=1 SV=2                                                 | 10         | 1.23E-05 | 4.928  |
| 13           | P02769    | SWISS-PROT:P02769 (Bos taurus) Bovine serum albumin precursor                                                                        | 10         | 5.25E-06 | 8.0004 |
| 11           | Q7TPR4    | Alpha-actinin-1 OS=Mus musculus OX=10090 GN=Actn1 PE=1 SV=1                                                                          | 10         | 1.63E-07 | 4.1892 |
| 20           | O08749    | Dihydrodipoloyl dehydrogenase, mitochondrial OS=Mus musculus OX=10090 GN=Dld PE=1 SV=2                                               | 10         | 3.3E-07  | 6.1991 |
| 28           | Q8BVY0    | Ribosomal L1 domain-containing protein 1 OS=Mus musculus OX=10090 GN=Rsl1d1 PE=1 SV=1                                                | 9          | 3.87E-07 | 8.2732 |
| 29           | Q99020    | Heterogeneous nuclear ribonucleoprotein A/B OS=Mus musculus OX=10090 GN=Hnrnpab PE=1 SV=1                                            | 9          | 1.07E-05 | 5.6990 |
| 25           | P99024    | Tubulin beta-5 chain OS=Mus musculus OX=10090 GN=Tubb5 PE=1 SV=1                                                                     | 9          | 8.25E-05 | 3.1115 |
| 11           | O08528    | Hexokinase-2 OS=Mus musculus OX=10090 GN=Hk2 PE=1 SV=1                                                                               | 9          | 3.86E-05 | 5.501  |
| 25           | P68372    | Tubulin beta-4B chain OS=Mus musculus OX=10090 GN=Tubb4b PE=1 SV=1                                                                   | 9          | 8.95E-06 | 4.6582 |
| 8            | Q9JKF1    | Ras GTPase-activating-like protein IQGAP1 OS=Mus musculus OX=10090 GN=Iqgap1 PE=1 SV=2                                               | 9          | 1.07E-06 | 3.0276 |
| 20           | P05064    | Fructose-bisphosphate aldolase A OS=Mus musculus OX=10090 GN=Aldoa PE=1 SV=2                                                         | 9          | 2.75E-09 | 6.1864 |
| 14           | Q04750    | DNA topoisomerase 1 OS=Mus musculus OX=10090 GN=Top1 PE=1 SV=2                                                                       | 9          | 1.17E-05 | 3.7999 |
| 17           | D3Z7P3    | Glutaminase kidney isoform, mitochondrial OS=Mus musculus OX=10090 GN=Gls PE=1 SV=1                                                  | 9          | 7.31E-07 | 6.3549 |
| 22           | P26041    | Moiesin OS=Mus musculus OX=10090 GN=Msn PE=1 SV=3                                                                                    | 9          | 1.38E-05 | 6.6565 |
| 18           | Q8K2B3    | Succinate dehydrogenase [ubiquinone] flavoprotein subunit, mitochondrial OS=Mus musculus OX=10090 GN=Sdha PE=1 SV=1                  | 9          | 3.19E-06 | 4.738  |
| 14           | Q9QXX4    | Calcium-binding mitochondrial carrier protein Aralar2 OS=Mus musculus OX=10090 GN=Slc25a13 PE=1 SV=1                                 | 9          | 1.47E-07 | 5.469  |
| 11           | Q3U821    | WD repeat-containing protein 75 OS=Mus musculus OX=10090 GN=Wdr75 PE=1 SV=1                                                          | 9          | 3.49E-05 | 5.7900 |
| 16           | Q921N6    | Probable ATP-dependent RNA helicase DDX27 OS=Mus musculus OX=10090 GN=Ddx27 PE=1 SV=3                                                | 9          | 1.22E-05 | 4.4854 |
| 18           | P37040    | NADPH-cytochrome P450 reductase OS=Mus musculus OX=10090 GN=Por PE=1 SV=2                                                            | 9          | 2.17E-06 | 4.9086 |
| 11           | P17710    | Hexokinase-1 OS=Mus musculus OX=10090 GN=Hk1 PE=1 SV=3                                                                               | 9          | 6.19E-07 | 4.6412 |
| 22           | P06151    | L-lactate dehydrogenase A chain OS=Mus musculus OX=10090 GN=Ldha PE=1 SV=3                                                           | 9          | 1.99E-07 | 4.258  |
| 11           | Q8BH59    | Calcium-binding mitochondrial carrier protein Aralar1 OS=Mus musculus OX=10090 GN=Slc25a12 PE=1 SV=1                                 | 9          | 1.65E-06 | 3.4216 |
| 26           | P61979    | Heterogeneous nuclear ribonucleoprotein K OS=Mus musculus OX=10090 GN=Hnrnpk PE=1 SV=1                                               | 9          | 1.87E-08 | 8.2985 |
| 30           | P17751    | Triosephosphate isomerase OS=Mus musculus OX=10090 GN=Tpi1 PE=1 SV=4                                                                 | 9          | 2.02E-06 | 5.8728 |
| 17           | Q8BMF4    | Acetyl-CoA:lysine-residue acetyltransferase component of pyruvate dehydrogenase complex, mitochondrial OS=Mus musculus OX=10090 GN=D | 9          | 2.45E-07 | 5.8231 |
| 16           | Q8BSY0    | Aspartyl/asparaginyl beta-hydroxylase OS=Mus musculus OX=10090 GN=Asph PE=1 SV=1                                                     | 9          | 0.000192 | 6.0449 |
| 27           | P05202    | Aspartate aminotransferase, mitochondrial OS=Mus musculus OX=10090 GN=Got2 PE=1 SV=1                                                 | 9          | 2.32E-08 | 4.4416 |

|    |         |                                                                                                                                           |   |          |        |
|----|---------|-------------------------------------------------------------------------------------------------------------------------------------------|---|----------|--------|
| 18 | Q91YQ5  | Dolichyl-diphosphooligosaccharide--protein glycosyltransferase subunit 1 OS=Mus musculus OX=10090 GN=Rpn1 PE=1 SV=1                       | 9 | 1.61E-06 | 4.625  |
| 5  | F6ZDS4  | Nucleoprotein TPR OS=Mus musculus OX=10090 GN=Tpr PE=1 SV=1                                                                               | 9 | 1.83E-05 | 4.4842 |
| 23 | Q922R8  | Protein disulfide-isomerase A6 OS=Mus musculus OX=10090 GN=Pdia6 PE=1 SV=3                                                                | 9 | 1.26E-06 | 4.4209 |
| 13 | Q6ZQL4  | WD repeat-containing protein 43 OS=Mus musculus OX=10090 GN=Wdr43 PE=1 SV=2                                                               | 8 | 1.78E-06 | 5.6997 |
| 8  | Q99NB9  | Splicing factor 3B subunit 1 OS=Mus musculus OX=10090 GN=Sf3b1 PE=1 SV=1                                                                  | 8 | 1.8E-06  | 4.239  |
| 18 | Q9D0K2  | Succinyl-CoA:3-ketoacid coenzyme A transferase 1, mitochondrial OS=Mus musculus OX=10090 GN=Oxct1 PE=1 SV=1                               | 8 | 4.51E-06 | 6.1283 |
| 17 | Q7TMK9  | Heterogeneous nuclear ribonucleoprotein Q OS=Mus musculus OX=10090 GN=Synrcp PE=1 SV=2                                                    | 8 | 5.36E-06 | 5.2875 |
| 16 | Q61656  | Probable ATP-dependent RNA helicase DDX5 OS=Mus musculus OX=10090 GN=Ddx5 PE=1 SV=2                                                       | 8 | 8.54E-08 | 5.997  |
| 17 | Q9EQ61  | Pescadillo homolog OS=Mus musculus OX=10090 GN=Pes1 PE=1 SV=1                                                                             | 8 | 3.74E-06 | 6.8605 |
| 20 | O35737  | Heterogeneous nuclear ribonucleoprotein H OS=Mus musculus OX=10090 GN=Hnmp1 PE=1 SV=3                                                     | 8 | 1.13E-08 | 7.1571 |
| 11 | P80317  | T-complex protein 1 subunit zeta OS=Mus musculus OX=10090 GN=Cct6a PE=1 SV=3                                                              | 8 | 0.000279 | 6.0328 |
| 8  | Q921M3  | Splicing factor 3B subunit 3 OS=Mus musculus OX=10090 GN=Sf3b3 PE=1 SV=1                                                                  | 8 | 1.51E-06 | 4.0945 |
| 38 | P35278  | Ras-related protein Rab-5C OS=Mus musculus OX=10090 GN=Rab5c PE=1 SV=2                                                                    | 8 | 0.000118 | 5.8140 |
| 10 | Q9Z1X4  | Interleukin enhancer-binding factor 3 OS=Mus musculus OX=10090 GN=Ilf3 PE=1 SV=2                                                          | 8 | 3.42E-05 | 4.8616 |
| 49 | P62806  | Histone H4 OS=Mus musculus OX=10090 GN=H4c1 PE=1 SV=2                                                                                     | 8 | 2.75E-06 | 4.3331 |
| 23 | Q9D051  | Pyruvate dehydrogenase E1 component subunit beta, mitochondrial OS=Mus musculus OX=10090 GN=Pdhb PE=1 SV=1                                | 8 | 5.14E-06 | 6.4463 |
| 23 | P48962  | ADP/ATP translocase 1 OS=Mus musculus OX=10090 GN=Slc25a4 PE=1 SV=4                                                                       | 8 | 8.41E-06 | 5.1624 |
| 8  | Q8R0G9  | Nuclear pore complex protein Nup133 OS=Mus musculus OX=10090 GN=Nup133 PE=1 SV=2                                                          | 8 | 2.73E-07 | 4.4343 |
| 16 | Q9CZL6  | Citrate synthase, mitochondrial OS=Mus musculus OX=10090 GN=Cs PE=1 SV=1                                                                  | 8 | 3.4E-07  | 3.8184 |
| 52 | P62821  | Ras-related protein Rab-1A OS=Mus musculus OX=10090 GN=Rab1A PE=1 SV=3                                                                    | 8 | 6.7E-06  | 6.4918 |
| 11 | Q8BHN3  | Neutral alpha-glucosidase AB OS=Mus musculus OX=10090 GN=Ganab PE=1 SV=1                                                                  | 8 | 2.46E-07 | 2.2861 |
| 12 | P70168  | Importin subunit beta-1 OS=Mus musculus OX=10090 GN=Kpnb1 PE=1 SV=2                                                                       | 8 | 2.46E-06 | 9.9300 |
| 26 | P29758  | Ornithine aminotransferase, mitochondrial OS=Mus musculus OX=10090 GN=Oat PE=1 SV=1                                                       | 8 | 3.14E-08 | 5.6191 |
| 16 | Q92511  | ATPase family AAA domain-containing protein 3 OS=Mus musculus OX=10090 GN=Atad3 PE=1 SV=1                                                 | 8 | 2.05E-06 | 7.2097 |
| 23 | Q9DCW4  | Electron transfer flavoprotein subunit beta OS=Mus musculus OX=10090 GN=Etfb PE=1 SV=3                                                    | 7 | 6.31E-08 | 7.4168 |
| 11 | P111103 | Poly [ADP-ribose] polymerase 1 OS=Mus musculus OX=10090 GN=Parp1 PE=1 SV=3                                                                | 7 | 1.94E-05 | 3.6121 |
| 25 | P27773  | Protein disulfide-isomerase A3 OS=Mus musculus OX=10090 GN=Pdia3 PE=1 SV=2                                                                | 7 | 5.97E-07 | 6.6087 |
| 16 | P24270  | Catalase OS=Mus musculus OX=10090 GN=Cat PE=1 SV=4                                                                                        | 7 | 3.95E-06 | 4.4652 |
| 12 | Q8BJ71  | Nuclear pore complex protein Nup93 OS=Mus musculus OX=10090 GN=Nup93 PE=1 SV=1                                                            | 7 | 3.79E-06 | 4.5065 |
| 10 | Q8K363  | ATP-dependent RNA helicase DDX18 OS=Mus musculus OX=10090 GN=Ddx18 PE=1 SV=1                                                              | 7 | 6.53E-06 | 6.8007 |
| 15 | Q62167  | ATP-dependent RNA helicase DDX3X OS=Mus musculus OX=10090 GN=Ddx3x PE=1 SV=3                                                              | 7 | 4.89E-05 | 5.6836 |
| 10 | Q9CZU3  | Exosome RNA helicase MTR4 OS=Mus musculus OX=10090 GN=Mtrex PE=1 SV=1                                                                     | 7 | 1.15E-09 | 6.4522 |
| 3  | Q9JHU4  | Cytoplasmic dynein 1 heavy chain 1 OS=Mus musculus OX=10090 GN=Dync1h1 PE=1 SV=2                                                          | 7 | 3.19E-06 | 3.5711 |
| 15 | Q8QZT1  | Acetyl-CoA acetyltransferase, mitochondrial OS=Mus musculus OX=10090 GN=Acac1 PE=1 SV=1                                                   | 7 | 3.38E-08 | 3.3259 |
| 17 | Q9CPY7  | Cytosol aminopeptidase OS=Mus musculus OX=10090 GN=Lap3 PE=1 SV=3                                                                         | 7 | 2.5E-07  | 5.5751 |
| 14 | P80314  | T-complex protein 1 subunit beta OS=Mus musculus OX=10090 GN=Cct2 PE=1 SV=4                                                               | 7 | 1.96E-05 | 5.2267 |
| 24 | Q9WV55  | Vesicle-associated membrane protein-associated protein A OS=Mus musculus OX=10090 GN=Vapa PE=1 SV=2                                       | 7 | 1.38E-06 | 8.0519 |
| 7  | P17225  | Polypyrimidine tract-binding protein 1 OS=Mus musculus OX=10090 GN=Ptbp1 PE=1 SV=2                                                        | 7 | 1.31E-05 | 5.8948 |
| 11 | Q9D8E6  | 60S ribosomal protein L4 OS=Mus musculus OX=10090 GN=Rpl4 PE=1 SV=3                                                                       | 7 | 8.17E-07 | 5.8208 |
| 15 | Q9Z218  | Succinate--CoA ligase [GDP-forming] subunit beta, mitochondrial OS=Mus musculus OX=10090 GN=Succlg2 PE=1 SV=3                             | 7 | 4.93E-05 | 5.1216 |
| 7  | Q61595  | Kinetin OS=Mus musculus OX=10090 GN=Ktn1 PE=1 SV=1                                                                                        | 7 | 1.76E-06 | 4.9880 |
| 5  | B2RQC6  | CAD protein OS=Mus musculus OX=10090 GN=Cad PE=1 SV=1                                                                                     | 7 | 6.38E-05 | 2.6317 |
| 9  | P58252  | Elongation factor 2 OS=Mus musculus OX=10090 GN=Eef2 PE=1 SV=2                                                                            | 7 | 4.15E-07 | 5.1745 |
| 23 | Q9CXV6  | Interleukin enhancer-binding factor 2 OS=Mus musculus OX=10090 GN=Ilf2 PE=1 SV=1                                                          | 7 | 3.72E-07 | 7.4156 |
| 15 | O35857  | Mitochondrial import inner membrane translocase subunit TIM44 OS=Mus musculus OX=10090 GN=Timm44 PE=1 SV=2                                | 7 | 0.000312 | 5.2838 |
| 17 | Q9D2G2  | -residue succinyltransferase component of 2-oxoglutarate dehydrogenase complex, mitochondrial OS=Mus musculus OX=10090 GN=Oxdl1 PE=1 SV=1 | 7 | 2.58E-06 | 6.3800 |
| 16 | Q99JR1  | Sideroflexin-1 OS=Mus musculus OX=10090 GN=Sfxn1 PE=1 SV=3                                                                                | 7 | 4.01E-05 | 4.7616 |
| 11 | Q9D6Z1  | Nucleolar protein 56 OS=Mus musculus OX=10090 GN=Nop56 PE=1 SV=2                                                                          | 7 | 9.56E-05 | 6.4446 |
| 18 | P35486  | Pyruvate dehydrogenase E1 component subunit alpha, somatic form, mitochondrial OS=Mus musculus OX=10090 GN=Pdhaf1 PE=1 SV=1               | 6 | 4.3E-07  | 6.3209 |
| 17 | O35855  | Branched-chain-amino-acid aminotransferase, mitochondrial OS=Mus musculus OX=10090 GN=Beat2 PE=1 SV=2                                     | 6 | 2.22E-05 | 5.3250 |
| 5  | O35134  | DNA-directed RNA polymerase I subunit RPA1 OS=Mus musculus OX=10090 GN=Polr1a PE=1 SV=2                                                   | 6 | 3.48E-06 | 4.5224 |
| 12 | Q9Z0N1  | Eukaryotic translation initiation factor 2 subunit 3, X-linked OS=Mus musculus OX=10090 GN=Eif2s3x PE=1 SV=2                              | 6 | 2.65E-05 | 6.7660 |
| 28 | Q64012  | RNA-binding protein Raly OS=Mus musculus OX=10090 GN=Raly PE=1 SV=3                                                                       | 6 | 1.66E-06 | 5.5327 |
| 15 | P27659  | 60S ribosomal protein L3 OS=Mus musculus OX=10090 GN=Rpl3 PE=1 SV=3                                                                       | 6 | 3.31E-07 | 4.9812 |
| 6  | Q6NS46  | Protein RRP5 homolog OS=Mus musculus OX=10090 GN=Pdccl1 PE=1 SV=2                                                                         | 6 | 2.37E-05 | 6.486  |
| 6  | P57780  | Alpha-actinin-4 OS=Mus musculus OX=10090 GN=Actn4 PE=1 SV=1                                                                               | 6 | 1.37E-09 | 6.3769 |
| 10 | Q9DBY8  | Nuclear valosin-containing protein-like OS=Mus musculus OX=10090 GN=Nvl PE=1 SV=1                                                         | 6 | 5.99E-05 | 4.1227 |
| 17 | P47911  | 60S ribosomal protein L6 OS=Mus musculus OX=10090 GN=Rpl6 PE=1 SV=3                                                                       | 6 | 1.01E-06 | 6.4714 |
| 23 | P62908  | 40S ribosomal protein S3 OS=Mus musculus OX=10090 GN=Rps3 PE=1 SV=1                                                                       | 6 | 6.62E-07 | 5.5653 |
| 17 | P10126  | Elongation factor 1-alpha OS=Mus musculus OX=10090 GN=Eef1a1 PE=1 SV=3                                                                    | 6 | 4.7E-06  | 5.8314 |
| 9  | Q8VDN2  | Sodium/potassium-transporting ATPase subunit alpha-1 OS=Mus musculus OX=10090 GN=Atp1a1 PE=1 SV=1                                         | 6 | 5.69E-07 | 5.82   |
| 4  | Q5SWU9  | Acetyl-CoA carboxylase 1 OS=Mus musculus OX=10090 GN=Acaca PE=1 SV=1                                                                      | 6 | 1.55E-05 | 2.4541 |
| 9  | Q8VHE0  | Translocation protein SEC63 homolog OS=Mus musculus OX=10090 GN=Sec63 PE=1 SV=4                                                           | 6 | 8.47E-07 | 5.8642 |
| 40 | P18760  | Cofilin-1 OS=Mus musculus OX=10090 GN=Cfl1 PE=1 SV=3                                                                                      | 6 | 7.32E-06 | 2.8422 |
| 23 | P49312  | Heterogeneous nuclear ribonucleoprotein A1 OS=Mus musculus OX=10090 GN=Hnmpa1 PE=1 SV=2                                                   | 6 | 8.46E-09 | 7.3188 |
| 10 | P41216  | Long-chain-fatty-acid--CoA ligase 1 OS=Mus musculus OX=10090 GN=Acsl1 PE=1 SV=2                                                           | 6 | 4.17E-07 | 5.4814 |
| 16 | Q9D6R2  | Isocitrate dehydrogenase [NAD] subunit alpha, mitochondrial OS=Mus musculus OX=10090 GN=Idh3a PE=1 SV=1                                   | 6 | 1.59E-05 | 8.2148 |
| 15 | Q9R112  | Sulfide:quinone oxidoreductase, mitochondrial OS=Mus musculus OX=10090 GN=Sqr PE=1 SV=3                                                   | 6 | 1.9E-05  | 3.8406 |
| 5  | P53569  | CCAAT/enhancer-binding protein zeta OS=Mus musculus OX=10090 GN=Cebpz PE=1 SV=2                                                           | 6 | 7.68E-07 | 6.1554 |
| 24 | P62702  | 40S ribosomal protein S4, X isoform OS=Mus musculus OX=10090 GN=Rps4x PE=1 SV=2                                                           | 6 | 4.29E-06 | 6.3401 |
| 9  | P46460  | Vesicle-fusing ATPase OS=Mus musculus OX=10090 GN=Nsf PE=1 SV=2                                                                           | 6 | 6.16E-06 | 5.0535 |
| 9  | Q8BU03  | Periodic tryptophan protein 2 homolog OS=Mus musculus OX=10090 GN=Pwp2 PE=1 SV=1                                                          | 6 | 5.19E-05 | 4.7085 |
| 14 | Q61233  | Plastin-2 OS=Mus musculus OX=10090 GN=Lcp1 PE=1 SV=4                                                                                      | 6 | 3.75E-06 | 4.2131 |
| 8  | P97452  | Ribosome biogenesis protein BOP1 OS=Mus musculus OX=10090 GN=Bop1 PE=1 SV=1                                                               | 6 | 1.41E-06 | 3.727  |
| 20 | P02533  | SWISS-PROT:P02533 Tax_Id=9606 Gene_Symbol=KRT14 Keratin, type I cytoskeletal 14                                                           | 6 | 0.000362 | 2.0467 |
| 12 | Q9EP69  | Phosphatidylinositol phosphate SAC1 OS=Mus musculus OX=10090 GN=Sacm11 PE=1 SV=1                                                          | 6 | 2.97E-05 | 4.4672 |
| 11 | Q8JZQ2  | AFG3-like protein 2 OS=Mus musculus OX=10090 GN=Afg3l2 PE=1 SV=1                                                                          | 6 | 2.34E-05 | 6.2813 |
| 10 | Q9DCD0  | 6-phosphogluconate dehydrogenase, decarboxylating OS=Mus musculus OX=10090 GN=Pgd PE=1 SV=3                                               | 6 | 1.35E-05 | 4.8052 |
| 24 | P62267  | 40S ribosomal protein S23 OS=Mus musculus OX=10090 GN=Rps23 PE=1 SV=3                                                                     | 6 | 2.78E-05 | 5.2300 |
| 5  | P26039  | Talin-1 OS=Mus musculus OX=10090 GN=Tln1 PE=1 SV=2                                                                                        | 6 | 6.56E-07 | 7.9577 |
| 8  | Q9CZW4  | Long-chain-fatty-acid--CoA ligase 3 OS=Mus musculus OX=10090 GN=Acsl3 PE=1 SV=2                                                           | 6 | 1.13E-05 | 4.355  |
| 27 | P63101  | 14-3-3 protein zeta/delta OS=Mus musculus OX=10090 GN=Ywhaz PE=1 SV=1                                                                     | 6 | 3.23E-06 | 6.9988 |
| 6  | Q61316  | Heat shock 70 kDa protein 4 OS=Mus musculus OX=10090 GN=Hspa4 PE=1 SV=1                                                                   | 6 | 1.04E-07 | 4.9032 |
| 18 | Q07417  | Short-chain specific acyl-CoA dehydrogenase, mitochondrial OS=Mus musculus OX=10090 GN=Acads PE=1 SV=2                                    | 6 | 1.76E-06 | 4.3960 |
| 11 | Q8C7V3  | U3 small nucleolar RNA-associated protein 15 homolog OS=Mus musculus OX=10090 GN=Utp15 PE=1 SV=1                                          | 6 | 9.85E-06 | 4.8146 |
| 12 | Q9DC61  | Mitochondrial-processing peptidase subunit alpha OS=Mus musculus OX=10090 GN=Pmpca PE=1 SV=1                                              | 6 | 1.12E-07 | 4.9199 |
| 6  | Q3TRM8  | Hexokinase-3 OS=Mus musculus OX=10090 GN=Hk3 PE=1 SV=2                                                                                    | 6 | 1.49E-05 | 5.8369 |
| 17 | Q91VC3  | Eukaryotic initiation factor 4A-III OS=Mus musculus OX=10090 GN=Eif4a3 PE=1 SV=3                                                          | 6 | 2.28E-07 | 4.4844 |
| 8  | Q61753  | D-3-phosphoglycerate dehydrogenase OS=Mus musculus OX=10090 GN=Pgdh PE=1 SV=3                                                             | 6 | 2.22E-06 | 6.4566 |
| 9  | Q920B9  | FACT complex subunit SPT16 OS=Mus musculus OX=10090 GN=Supt16h PE=1 SV=2                                                                  | 5 | 0.000231 | 4.9110 |
| 12 | Q50136  | Probable ATP-dependent RNA helicase DDX17 OS=Mus musculus OX=10090 GN=Ddx17 PE=1 SV=1                                                     | 5 | 4.16E-05 | 4.3502 |
| 36 | P61027  | Ras-related protein Rab-10 OS=Mus musculus OX=10090 GN=Rab10 PE=1 SV=1                                                                    | 5 | 5.33E-05 | 6.0778 |
| 17 | P35550  | rRNA 2'-O-methyltransferase fibrillar OS=Mus musculus OX=10090 GN=Fbl PE=1 SV=2                                                           | 5 | 3.67E-07 | 7.5256 |
| 13 | Q9DB77  | Cytochrome b-c1 complex subunit 2, mitochondrial OS=Mus musculus OX=10090 GN=Uqcrc2 PE=1 SV=1                                             | 5 | 9.35E-06 | 5.5453 |
| 14 | P80318  | T-complex protein 1 subunit gamma OS=Mus musculus OX=10090 GN=Cct3 PE=1 SV=1                                                              | 5 | 2.61E-07 | 5.1917 |

|    |        |                                                                                                                               |   |          |        |
|----|--------|-------------------------------------------------------------------------------------------------------------------------------|---|----------|--------|
| 11 | P14824 | Annexin A6 OS=Mus musculus OX=10090 GN=Anxa6 PE=1 SV=3                                                                        | 5 | 4.52E-06 | 5.4624 |
| 24 | Q60930 | Voltage-dependent anion-selective channel protein 2 OS=Mus musculus OX=10090 GN=Vdac2 PE=1 SV=2                               | 5 | 3.4E-05  | 6.1421 |
| 16 | P07372 | ELAV-like protein 1 OS=Mus musculus OX=10090 GN=Elav1 PE=1 SV=2                                                               | 5 | 6.91E-06 | 4.8598 |
| 22 | Q9WTP6 | Adenylate kinase 2, mitochondrial OS=Mus musculus OX=10090 GN=Ak2 PE=1 SV=5                                                   | 5 | 1.92E-05 | 5.1215 |
| 11 | Q9Z210 | Mitochondrial proton/calcium exchanger protein OS=Mus musculus OX=10090 GN=Letm1 PE=1 SV=1                                    | 5 | 1.14E-05 | 5.0168 |
| 12 | P50544 | Very long-chain specific acyl-CoA dehydrogenase, mitochondrial OS=Mus musculus OX=10090 GN=Acadvl PE=1 SV=3                   | 5 | 1.05E-05 | 3.4866 |
| 7  | Q8K1R3 | Polyribonucleotide nucleotidyltransferase 1, mitochondrial OS=Mus musculus OX=10090 GN=Pnpt1 PE=1 SV=1                        | 5 | 1.69E-06 | 5.3041 |
| 3  | A2AGT5 | Cytoskeleton-associated protein 5 OS=Mus musculus OX=10090 GN=Ckap5 PE=1 SV=1                                                 | 5 | 7.38E-05 | 5.9951 |
| 11 | P97807 | Fumarate hydratase, mitochondrial OS=Mus musculus OX=10090 GN=Fh PE=1 SV=3                                                    | 5 | 0.000659 | 4.991  |
| 8  | Q8BIJ6 | Isoleucine--tRNA ligase, mitochondrial OS=Mus musculus OX=10090 GN=lars2 PE=1 SV=1                                            | 5 | 3.01E-05 | 3.565  |
| 6  | Q99P91 | Transmembrane glycoprotein NMB OS=Mus musculus OX=10090 GN=Gpmb PE=1 SV=2                                                     | 5 | 1.14E-05 | 5.7580 |
| 3  | Q9Z1Q9 | Valine--tRNA ligase OS=Mus musculus OX=10090 GN=Vars PE=1 SV=1                                                                | 5 | 9.18E-06 | 4.5686 |
| 10 | Q9DBG7 | Signal recognition particle receptor subunit alpha OS=Mus musculus OX=10090 GN=Sprpa PE=1 SV=1                                | 5 | 9E-05    | 5.8007 |
| 14 | P11983 | T-complex protein 1 subunit alpha OS=Mus musculus OX=10090 GN=Tcp1 PE=1 SV=3                                                  | 5 | 6.09E-05 | 5.4112 |
| 41 | Q64475 | Histone H2B type 1-B OS=Mus musculus OX=10090 GN=Hist1h2bb PE=1 SV=3                                                          | 5 | 9.13E-07 | 9.4745 |
| 9  | Q9Z0X1 | Apoptosis-inducing factor 1, mitochondrial OS=Mus musculus OX=10090 GN=Aifm1 PE=1 SV=1                                        | 5 | 1.7E-06  | 5.196  |
| 6  | Q8BHB4 | WD repeat-containing protein 3 OS=Mus musculus OX=10090 GN=Wdr3 PE=1 SV=1                                                     | 5 | 3.94E-06 | 5.2163 |
| 8  | Q6PIC6 | Sodium/potassium-transporting ATPase subunit alpha-3 OS=Mus musculus OX=10090 GN=Atp1a3 PE=1 SV=1                             | 5 | 6.74E-06 | 4.9981 |
| 29 | Q91V41 | Ras-related protein Rab-14 OS=Mus musculus OX=10090 GN=Rab14 PE=1 SV=3                                                        | 5 | 4.28E-05 | 4.0819 |
| 10 | P60843 | Eukaryotic initiation factor 4A-1 OS=Mus musculus OX=10090 GN=EIF4a1 PE=1 SV=1                                                | 5 | 1.79E-05 | 4.1302 |
| 12 | P32067 | Lupus La protein homolog OS=Mus musculus OX=10090 GN=Ssb PE=1 SV=1                                                            | 5 | 8.27E-07 | 10.280 |
| 17 | Q6ZWX6 | Eukaryotic translation initiation factor 2 subunit 1 OS=Mus musculus OX=10090 GN=EIF2s1 PE=1 SV=3                             | 5 | 1.85E-05 | 5.3367 |
| 5  | Q8CGC7 | Bifunctional glutamate/proline--tRNA ligase OS=Mus musculus OX=10090 GN=Eprs PE=1 SV=4                                        | 5 | 4.7E-07  | 4.373  |
| 6  | Q9Z0W3 | Nuclear pore complex protein Nup160 OS=Mus musculus OX=10090 GN=Nup160 PE=1 SV=2                                              | 5 | 5.03E-08 | 4.1488 |
| 9  | Q9QUU7 | Long-chain-fatty-acid--CoA ligase 4 OS=Mus musculus OX=10090 GN=Acs4 PE=1 SV=2                                                | 5 | 1.29E-05 | 3.693  |
| 10 | Q9JIH2 | Nuclear pore complex protein Nup50 OS=Mus musculus OX=10090 GN=Nup50 PE=1 SV=3                                                | 5 | 8.08E-07 | 5.5812 |
| 9  | P58742 | Aladin OS=Mus musculus OX=10090 GN=Aaas PE=1 SV=1                                                                             | 5 | 7.51E-05 | 4.4136 |
| 20 | Q8BK72 | 28S ribosomal protein S27, mitochondrial OS=Mus musculus OX=10090 GN=Mrps27 PE=1 SV=2                                         | 5 | 8.37E-06 | 6.6300 |
| 9  | P24547 | Inosine-5'-monophosphate dehydrogenase 2 OS=Mus musculus OX=10090 GN=Impdh2 PE=1 SV=2                                         | 5 | 5.95E-06 | 3.973  |
| 11 | Q99ME9 | Nucleolar GTP-binding protein 1 OS=Mus musculus OX=10090 GN=Gtpbp4 PE=1 SV=3                                                  | 5 | 7.89E-06 | 6.0329 |
| 14 | P16110 | Galectin-3 OS=Mus musculus OX=10090 GN=Lgals3 PE=1 SV=3                                                                       | 5 | 2.22E-06 | 6.1816 |
| 9  | Q9JKR6 | Hypoxia up-regulated protein 1 OS=Mus musculus OX=10090 GN=Hyou1 PE=1 SV=1                                                    | 5 | 5.68E-07 | 4.5415 |
| 20 | Q9D1D4 | Transmembrane emp24 domain-containing protein 10 OS=Mus musculus OX=10090 GN=Tmed10 PE=1 SV=1                                 | 5 | 6.72E-07 | 6.0791 |
| 19 | P17742 | Peptidyl-prolyl cis-trans isomerase A OS=Mus musculus OX=10090 GN=Ppia PE=1 SV=2                                              | 5 | 5.21E-06 | 6.8427 |
| 5  | Q9CW03 | Structural maintenance of chromosomes protein 3 OS=Mus musculus OX=10090 GN=Smc3 PE=1 SV=2                                    | 5 | 1.91E-05 | 5.0090 |
| 10 | Q53658 | Complement component 1 Q subcomponent-binding protein, mitochondrial OS=Mus musculus OX=10090 GN=C1qbp PE=1 SV=1              | 5 | 9.56E-06 | 7.9553 |
| 36 | P62962 | Profilin-1 OS=Mus musculus OX=10090 GN=Pfn1 PE=1 SV=2                                                                         | 5 | 1.64E-05 | 5.4144 |
| 17 | Q8CBB9 | Radical S-adenosyl methionine domain-containing protein 2 OS=Mus musculus OX=10090 GN=Rsad2 PE=1 SV=1                         | 5 | 2.11E-05 | 7.6311 |
| 31 | P63242 | Eukaryotic translation initiation factor 5A-1 OS=Mus musculus OX=10090 GN=EIF5a PE=1 SV=2                                     | 5 | 5.41E-06 | 5.4067 |
| 8  | P42932 | T-complex protein 1 subunit theta OS=Mus musculus OX=10090 GN=Cct8 PE=1 SV=3                                                  | 5 | 1.33E-06 | 4.9381 |
| 23 | P35980 | 60S ribosomal protein L18 OS=Mus musculus OX=10090 GN=Rpl18 PE=1 SV=3                                                         | 5 | 2.58E-06 | 4.9711 |
| 11 | Q9CXT8 | Mitochondrial-processing peptidase subunit beta OS=Mus musculus OX=10090 GN=Pmpcb PE=1 SV=1                                   | 5 | 9.75E-07 | 4.52   |
| 12 | P14733 | Lamin-B1 OS=Mus musculus OX=10090 GN=Lmnb1 PE=1 SV=3                                                                          | 5 | 2.85E-06 | 4.550  |
| 8  | Q6NZF1 | Zinc finger CCCH domain-containing protein 11A OS=Mus musculus OX=10090 GN=Zc3h11a PE=1 SV=1                                  | 5 | 2.1E-06  | 6.0703 |
| 16 | Q9D883 | Splicing factor U2AF 35 kDa subunit OS=Mus musculus OX=10090 GN=U2af1 PE=1 SV=4                                               | 5 | 0.000115 | 6.8258 |
| 17 | Q9D903 | Probable rRNA-processing protein EBP2 OS=Mus musculus OX=10090 GN=Ebna1bp2 PE=2 SV=1                                          | 4 | 8.9E-06  | 10.091 |
| 9  | Q9D0E1 | Heterogeneous nuclear ribonucleoprotein M OS=Mus musculus OX=10090 GN=Hnrnpm PE=1 SV=3                                        | 4 | 4.48E-07 | 7.136  |
| 16 | P09103 | Protein disulfide-isomerase OS=Mus musculus OX=10090 GN=P4hb PE=1 SV=2                                                        | 4 | 7.23E-06 | 4.8776 |
| 9  | P26369 | Splicing factor U2AF 65 kDa subunit OS=Mus musculus OX=10090 GN=U2af2 PE=1 SV=3                                               | 4 | 8.05E-07 | 3.9946 |
| 15 | Q60932 | Voltage-dependent anion-selective channel protein 1 OS=Mus musculus OX=10090 GN=Vdac1 PE=1 SV=3                               | 4 | 1.11E-06 | 4.6944 |
| 4  | Q6P5E4 | UDP-glucose:glycoprotein glucosyltransferase 1 OS=Mus musculus OX=10090 GN=Uggt1 PE=1 SV=4                                    | 4 | 1.92E-05 | 2.8043 |
| 12 | O70503 | Very-long-chain 3-oxoacyl-CoA reductase OS=Mus musculus OX=10090 GN=Hsd17b12 PE=1 SV=1                                        | 4 | 3.08E-06 | 6.4048 |
| 25 | Q99LP6 | GrpE protein homolog 1, mitochondrial OS=Mus musculus OX=10090 GN=Grpel1 PE=1 SV=1                                            | 4 | 3.25E-07 | 4.4400 |
| 9  | Q1HFZ0 | RNA cytosine C(5)-methyltransferase NSUN2 OS=Mus musculus OX=10090 GN=Nsun2 PE=1 SV=2                                         | 4 | 3.07E-05 | 3.2468 |
| 3  | Q6P5D8 | Structural maintenance of chromosomes flexible hinge domain-containing protein 1 OS=Mus musculus OX=10090 GN=Smchd1 PE=1 SV=3 | 4 | 5.14E-08 | 2.7629 |
| 9  | Q99JX7 | Nuclear RNA export factor 1 OS=Mus musculus OX=10090 GN=Nxf1 PE=1 SV=3                                                        | 4 | 1.97E-05 | 4.0286 |
| 6  | Q5SU45 | Unconventional myosin-Ig OS=Mus musculus OX=10090 GN=Myo1g PE=1 SV=1                                                          | 4 | 2.4E-06  | 4.8008 |
| 14 | P14869 | 60S acidic ribosomal protein P0 OS=Mus musculus OX=10090 GN=Rplp0 PE=1 SV=3                                                   | 4 | 5.4E-06  | 8.9462 |
| 6  | Q8VH51 | RNA-binding protein 39 OS=Mus musculus OX=10090 GN=Rbm39 PE=1 SV=2                                                            | 4 | 3.95E-05 | 5.8608 |
| 27 | P35700 | Peroxisomal protein 1 OS=Mus musculus OX=10090 GN=Prdx1 PE=1 SV=1                                                             | 4 | 5.59E-09 | 6.0014 |
| 10 | P40124 | Adenylyl cyclase-associated protein 1 OS=Mus musculus OX=10090 GN=Cap1 PE=1 SV=4                                              | 4 | 1.93E-06 | 4.8246 |
| 8  | Q640M1 | U3 small nucleolar RNA-associated protein 14 homolog A OS=Mus musculus OX=10090 GN=Utp14a PE=1 SV=1                           | 4 | 3.55E-07 | 5.7199 |
| 9  | Q8R2N2 | U3 small nucleolar RNA-associated protein 4 homolog OS=Mus musculus OX=10090 GN=Utp4 PE=2 SV=3                                | 4 | 6.49E-05 | 4.0923 |
| 14 | Q922Q4 | Pyroline-5-carboxylate reductase 2 OS=Mus musculus OX=10090 GN=Pycr2 PE=1 SV=1                                                | 4 | 0.000152 | 3.576  |
| 5  | Q9WV70 | Nucleolar complex protein 2 homolog OS=Mus musculus OX=10090 GN=Noc2l PE=1 SV=2                                               | 4 | 8.78E-08 | 6.595  |
| 5  | Q8BKCS | Importin-5 OS=Mus musculus OX=10090 GN=Ipo5 PE=1 SV=3                                                                         | 4 | 1.82E-07 | 4.6744 |
| 4  | Q9WUA2 | Phenylalanine--tRNA ligase beta subunit OS=Mus musculus OX=10090 GN=Far5b PE=1 SV=2                                           | 4 | 8.15E-06 | 5.1188 |
| 11 | P29341 | Polyadenylate-binding protein 1 OS=Mus musculus OX=10090 GN=Pabp1 PE=1 SV=2                                                   | 4 | 1.4E-05  | 7.0327 |
| 10 | Q8C0C1 | Alkylidihydroxyacetonephosphate synthase, peroxisomal OS=Mus musculus OX=10090 GN=Agps PE=1 SV=1                              | 4 | 6.27E-05 | 7.107  |
| 12 | Q8QZS1 | 3-hydroxyisobutyryl-CoA hydrolase, mitochondrial OS=Mus musculus OX=10090 GN=Hibch PE=1 SV=1                                  | 4 | 2.88E-06 | 7.6628 |
| 8  | Q8BH74 | Nuclear pore complex protein Nup107 OS=Mus musculus OX=10090 GN=Nup107 PE=1 SV=1                                              | 4 | 3.97E-05 | 3.6775 |
| 25 | P14131 | 40S ribosomal protein S16 OS=Mus musculus OX=10090 GN=Rps16 PE=1 SV=4                                                         | 4 | 1.19E-06 | 5.4449 |
| 14 | P50580 | Proliferation-associated protein 2G4 OS=Mus musculus OX=10090 GN=Pa2g4 PE=1 SV=3                                              | 4 | 1.01E-06 | 6.0702 |
| 4  | Q6PFD9 | Nuclear pore complex protein Nup98-Nup96 OS=Mus musculus OX=10090 GN=Nup98 PE=1 SV=2                                          | 4 | 7.16E-06 | 5.3804 |
| 12 | P09411 | Phosphoglycerate kinase 1 OS=Mus musculus OX=10090 GN=Pgk1 PE=1 SV=4                                                          | 4 | 1.15E-06 | 7.5020 |
| 4  | Q64737 | Trifunctional purine biosynthetic protein adenosine-3 OS=Mus musculus OX=10090 GN=Gart PE=1 SV=3                              | 4 | 6.01E-06 | 5.1619 |
| 4  | Q61879 | Myosin-10 OS=Mus musculus OX=10090 GN=Myy10 PE=1 SV=2                                                                         | 4 | 0.000658 | 7.4256 |
| 7  | Q76MZ3 | e/threonine-protein phosphatase 2A 65 kDa regulatory subunit A alpha isoform OS=Mus musculus OX=10090 GN=Ppp2r1a PE=1 SV=1    | 4 | 6.6E-05  | 8.775  |
| 10 | Q14C51 | Pentatricopeptide repeat domain-containing protein 3, mitochondrial OS=Mus musculus OX=10090 GN=Pctd3 PE=1 SV=2               | 4 | 7.61E-06 | 4.1146 |
| 4  | Q60864 | Stress-induced-phosphoprotein 1 OS=Mus musculus OX=10090 GN=Stip1 PE=1 SV=1                                                   | 4 | 0.000208 | 8.7708 |
| 11 | Q9D8N0 | Elongation factor 1-gamma OS=Mus musculus OX=10090 GN=Eef1g PE=1 SV=3                                                         | 4 | 2.9E-05  | 5.103  |
| 3  | P06800 | Receptor-type tyrosine-protein phosphatase C OS=Mus musculus OX=10090 GN=Ptpcr PE=1 SV=4                                      | 4 | 8.54E-06 | 7.7532 |
| 20 | Q99J16 | Ras-related protein Rap-1b OS=Mus musculus OX=10090 GN=Rap1b PE=1 SV=2                                                        | 4 | 6.54E-06 | 5.4047 |
| 13 | P62814 | V-type proton ATPase subunit B, brain isoform OS=Mus musculus OX=10090 GN=Atp6v1b2 PE=1 SV=1                                  | 4 | 1.75E-06 | 4.9953 |
| 33 | P63276 | 40S ribosomal protein S17 OS=Mus musculus OX=10090 GN=Rps17 PE=1 SV=2                                                         | 4 | 0.00024  | 6.188  |
| 5  | Q80VL1 | Tudor and KH domain-containing protein OS=Mus musculus OX=10090 GN=Tdrkh PE=1 SV=1                                            | 4 | 2.13E-07 | 6.8489 |
| 7  | Q8V1I6 | Splicing factor, proline- and glutamine-rich OS=Mus musculus OX=10090 GN=Sfpq PE=1 SV=1                                       | 4 | 0.000129 | 5.871  |
| 14 | Q9ESX5 | H/ACA ribonucleoprotein complex subunit DKC1 OS=Mus musculus OX=10090 GN=Dkc1 PE=1 SV=4                                       | 4 | 0.000558 | 4.488  |
| 4  | Q9JIX8 | Apoptotic chromatin condensation inducer in the nucleus OS=Mus musculus OX=10090 GN=Acin1 PE=1 SV=3                           | 4 | 6.82E-05 | 5.4371 |
| 7  | Q8K224 | RNA cytidine acetyltransferase OS=Mus musculus OX=10090 GN=Nat10 PE=1 SV=1                                                    | 4 | 3.56E-06 | 5.1726 |
| 4  | Q01320 | DNA topoisomerase 2-alpha OS=Mus musculus OX=10090 GN=Top2a PE=1 SV=2                                                         | 4 | 6.6E-07  | 8.3134 |
| 6  | Q62318 | Transcription intermediary factor 1-beta OS=Mus musculus OX=10090 GN=Trim28 PE=1 SV=3                                         | 4 | 4.58E-06 | 4.5501 |
| 9  | Q922K7 | Probable 28S rRNA (cytosine-C(5))-methyltransferase OS=Mus musculus OX=10090 GN=Nop2 PE=1 SV=1                                | 4 | 7.41E-08 | 6.5478 |
| 8  | P46471 | 26S proteasome regulatory subunit 7 OS=Mus musculus OX=10090 GN=Psmc2 PE=1 SV=5                                               | 4 | 3.98E-05 | 9.6818 |
| 3  | Q99PL5 | Ribosome-binding protein 1 OS=Mus musculus OX=10090 GN=Rbp1 PE=1 SV=2                                                         | 4 | 4.41E-07 | 7.921  |

|    |        |                                                                                                                    |   |          |        |
|----|--------|--------------------------------------------------------------------------------------------------------------------|---|----------|--------|
| 7  | B9EJ86 | Oxysterol-binding protein-related protein 8 OS=Mus musculus OX=10090 GN=Ospl8 PE=1 SV=1                            | 4 | 2.11E-06 | 5.9120 |
| 5  | Q5SYD0 | Unconventional myosin-IId OS=Mus musculus OX=10090 GN=Myo1d PE=1 SV=1                                              | 4 | 4.92E-06 | 3.7575 |
| 7  | P67475 | Glucose-6-phosphate isomerase OS=Mus musculus OX=10090 GN=Gpi PE=1 SV=4                                            | 4 | 1.32E-05 | 4.7268 |
| 5  | Q99P88 | Nuclear pore complex protein Nup155 OS=Mus musculus OX=10090 GN=Nup155 PE=1 SV=1                                   | 4 | 2.76E-05 | 4.0037 |
| 6  | P10852 | 4F2 cell-surface antigen heavy chain OS=Mus musculus OX=10090 GN=Slc3a2 PE=1 SV=1                                  | 4 | 9.57E-06 | 5.7220 |
| 6  | Q8K0D5 | Elongation factor G, mitochondrial OS=Mus musculus OX=10090 GN=Gfm1 PE=1 SV=1                                      | 4 | 3.96E-06 | 3.7575 |
| 24 | Q9WVA4 | Transgelin-2 OS=Mus musculus OX=10090 GN=Tagln2 PE=1 SV=4                                                          | 4 | 2.71E-06 | 8.3292 |
| 5  | P58281 | Dynamin-like 120 kDa protein, mitochondrial OS=Mus musculus OX=10090 GN=Opa1 PE=1 SV=1                             | 4 | 9.56E-06 | 5.3864 |
| 3  | Q8BTM8 | Filamin-A OS=Mus musculus OX=10090 GN=Flna PE=1 SV=5                                                               | 4 | 1E-06    | 3.588  |
| 11 | Q3U0V1 | Far upstream element-binding protein 2 OS=Mus musculus OX=10090 GN=Khsrp PE=1 SV=2                                 | 4 | 7.32E-05 | 2.6147 |
| 37 | P62984 | Ubiquitin-60S ribosomal protein L40 OS=Mus musculus OX=10090 GN=Uba52 PE=1 SV=2                                    | 4 | 4.23E-06 | 5.1285 |
| 2  | Q9EPU4 | Cleavage and polyadenylation specificity factor subunit 1 OS=Mus musculus OX=10090 GN=Cpsf1 PE=1 SV=1              | 4 | 0.000103 | 4.0066 |
| 10 | Q9Z1N5 | Spliceosome RNA helicase Ddx39b OS=Mus musculus OX=10090 GN=Ddx39b PE=1 SV=1                                       | 4 | 2.59E-06 | 6.4739 |
| 11 | P14148 | 60S ribosomal protein L7 OS=Mus musculus OX=10090 GN=Rpl7 PE=1 SV=2                                                | 4 | 6.2E-07  | 3.2219 |
| 13 | Q30681 | High mobility group protein B2 OS=Mus musculus OX=10090 GN=Hmgb2 PE=1 SV=3                                         | 4 | 7.23E-06 | 6.7944 |
| 8  | Q9CWI9 | Bifunctional purine biosynthesis protein PURH OS=Mus musculus OX=10090 GN=Atic PE=1 SV=2                           | 4 | 3.01E-06 | 4.2026 |
| 30 | Q9D1G1 | Ras-related protein Rab-1B OS=Mus musculus OX=10090 GN=Rab1b PE=1 SV=1                                             | 4 | 7.99E-05 | 4.750  |
| 10 | P20108 | Thioredoxin-dependent peroxide reductase, mitochondrial OS=Mus musculus OX=10090 GN=Prdx3 PE=1 SV=1                | 4 | 8.51E-06 | 3.9806 |
| 13 | Q9CQA3 | Succinate dehydrogenase [ubiquinone] iron-sulfur subunit, mitochondrial OS=Mus musculus OX=10090 GN=Sdhb PE=1 SV=1 | 4 | 7.19E-06 | 4.8654 |
| 11 | Q9CY58 | Plasminogen activator inhibitor 1 RNA-binding protein OS=Mus musculus OX=10090 GN=Serbp1 PE=1 SV=2                 | 4 | 9.11E-07 | 7.5901 |
| 11 | Q60766 | Immunity-related GTPase family M protein 1 OS=Mus musculus OX=10090 GN=Irgm1 PE=1 SV=1                             | 4 | 5.67E-05 | 5.7087 |
| 10 | Q9R0X4 | Acyl-coenzyme A thioesterase 9, mitochondrial OS=Mus musculus OX=10090 GN=Acot9 PE=1 SV=1                          | 4 | 8.76E-05 | 5.7041 |
| 8  | Q6ZQ58 | La-related protein 1 OS=Mus musculus OX=10090 GN=Larp1 PE=1 SV=3                                                   | 4 | 8.68E-05 | 10.790 |
| 9  | Q6A068 | Cell division cycle 5-like protein OS=Mus musculus OX=10090 GN=Cdc5l PE=1 SV=2                                     | 4 | 3.82E-07 | 6.9685 |
| 8  | Q9R233 | Tapasin OS=Mus musculus OX=10090 GN=Tapbp PE=1 SV=2                                                                | 4 | 3.22E-06 | 5.9263 |
| 7  | Q91WM3 | U3 small nucleolar RNA-interacting protein 2 OS=Mus musculus OX=10090 GN=Rrp9 PE=1 SV=1                            | 4 | 0.000123 | 6.4939 |
| 11 | Q922Q8 | Leucine-rich repeat-containing protein 59 OS=Mus musculus OX=10090 GN=Lrrc59 PE=1 SV=1                             | 4 | 1.2E-05  | 9.7092 |
| 12 | P53026 | 60S ribosomal protein L10a OS=Mus musculus OX=10090 GN=Rpl10a PE=1 SV=3                                            | 4 | 0.001338 | 4.4207 |
| 8  | Q8VDF2 | E3 ubiquitin-protein ligase UHRF1 OS=Mus musculus OX=10090 GN=Uhrf1 PE=1 SV=2                                      | 4 | 5.39E-06 | 5.7847 |
| 13 | Q6PHZ2 | Calcium/calmodulin-dependent protein kinase type II subunit delta OS=Mus musculus OX=10090 GN=Camk2d PE=1 SV=1     | 4 | 2.15E-05 | 3.4608 |
| 11 | Q9Z2X1 | Heterogeneous nuclear ribonucleoprotein F OS=Mus musculus OX=10090 GN=Hnmpf PE=1 SV=3                              | 4 | 2.94E-05 | 11.520 |
| 4  | P97386 | DNA ligase 3 OS=Mus musculus OX=10090 GN=Lig3 PE=1 SV=2                                                            | 4 | 7.41E-05 | 4.9959 |
| 20 | Q6PDM2 | Serine/arginine-rich splicing factor 1 OS=Mus musculus OX=10090 GN=Srsf1 PE=1 SV=3                                 | 4 | 7.36E-06 | 5.5026 |
| 10 | Q8VDW0 | ATP-dependent RNA helicase DDX39A OS=Mus musculus OX=10090 GN=Ddx39a PE=1 SV=1                                     | 4 | 4.93E-05 | 3.7661 |
| 5  | Q02053 | Ubiquitin-like modifier-activating enzyme 1 OS=Mus musculus OX=10090 GN=Uba1 PE=1 SV=1                             | 4 | 5.74E-06 | 4.6481 |
| 4  | Q80X82 | Symplekin OS=Mus musculus OX=10090 GN=Sympk PE=1 SV=1                                                              | 4 | 2.69E-05 | 5.8658 |
| 11 | P68040 | Receptor of activated protein C kinase 1 OS=Mus musculus OX=10090 GN=Rack1 PE=1 SV=3                               | 4 | 4.72E-06 | 5.0671 |
| 6  | O89053 | Coronin-1A OS=Mus musculus OX=10090 GN=Coro1a PE=1 SV=5                                                            | 4 | 1.88E-05 | 5.9341 |
| 7  | P46061 | Ran GTPase-activating protein 1 OS=Mus musculus OX=10090 GN=Rangap1 PE=1 SV=2                                      | 4 | 4.18E-05 | 6.4269 |
| 3  | P70700 | DNA-directed RNA polymerase I subunit RPA2 OS=Mus musculus OX=10090 GN=Polr1b PE=1 SV=2                            | 4 | 3.68E-05 | 5.5475 |
| 4  | Q8VDM4 | 26S proteasome non-ATPase regulatory subunit 2 OS=Mus musculus OX=10090 GN=Psm2 PE=1 SV=1                          | 4 | 3.14E-06 | 3.8679 |
| 10 | P80315 | T-complex protein 1 subunit delta OS=Mus musculus OX=10090 GN=Cct4 PE=1 SV=3                                       | 4 | 7.78E-07 | 2.9784 |
| 5  | Q8VCY6 | U3 small nucleolar RNA-associated protein 6 homolog OS=Mus musculus OX=10090 GN=Utp6 PE=2 SV=1                     | 4 | 2.36E-05 | 2.6673 |
| 2  | Q61687 | Transcriptional regulator ATRX OS=Mus musculus OX=10090 GN=Atrx PE=1 SV=3                                          | 4 | 0.000137 | 4.3312 |
| 4  | O70318 | Band 4.1-like protein 2 OS=Mus musculus OX=10090 GN=Epb41l2 PE=1 SV=2                                              | 4 | 0.000359 | 2.5916 |
| 3  | Q8K4Z5 | Splicing factor 3A subunit 1 OS=Mus musculus OX=10090 GN=Sf3a1 PE=1 SV=1                                           | 4 | 1.98E-05 | 3.3488 |
| 18 | Q921F2 | TAR DNA-binding protein 43 OS=Mus musculus OX=10090 GN=Tardbp PE=1 SV=1                                            | 4 | 4.44E-07 | 8.0159 |
| 7  | Q9DBL1 | Short/branched chain specific acyl-CoA dehydrogenase, mitochondrial OS=Mus musculus OX=10090 GN=Acad5b PE=1 SV=1   | 4 | 1.39E-05 | 2.8236 |
| 9  | P32020 | Non-specific lipid-transfer protein OS=Mus musculus OX=10090 GN=Scp2 PE=1 SV=3                                     | 4 | 7.94E-07 | 8.9822 |
| 5  | Q8BHD7 | Polypyrimidine tract-binding protein 3 OS=Mus musculus OX=10090 GN=Ptbp3 PE=1 SV=1                                 | 4 | 0.000129 | 7.043  |
| 16 | Q8BL97 | Serine/arginine-rich splicing factor 7 OS=Mus musculus OX=10090 GN=Srsf7 PE=1 SV=1                                 | 4 | 3.07E-06 | 5.0575 |
| 10 | Q9CZR8 | Elongation factor Ts, mitochondrial OS=Mus musculus OX=10090 GN=Tsfm PE=1 SV=1                                     | 4 | 0.000134 | 4.4637 |
| 6  | P51660 | Peroxisomal multifunctional enzyme type 2 OS=Mus musculus OX=10090 GN=Hsd17b4 PE=1 SV=3                            | 4 | 9.97E-07 | 5.3644 |
| 25 | Q9CQR4 | Acyl-coenzyme A thioesterase 13 OS=Mus musculus OX=10090 GN=Acot13 PE=1 SV=1                                       | 4 | 1.35E-06 | 4.5910 |
| 2  | O88379 | Bromodomain adjacent to zinc finger domain protein 1A OS=Mus musculus OX=10090 GN=Baz1a PE=1 SV=3                  | 4 | 3.64E-06 | 7.0294 |
| 6  | Q9CZ91 | Serum response factor-binding protein 1 OS=Mus musculus OX=10090 GN=Srfbp1 PE=1 SV=1                               | 4 | 2.77E-05 | 10.730 |
| 3  | Q8BX70 | Vacuolar protein sorting-associated protein 13C OS=Mus musculus OX=10090 GN=Vps13c PE=1 SV=2                       | 4 | 0.018393 | 3.0064 |
